# Supplementary material for: Efficient trifluoromethylation of C(sp2)–H functionalized α-oxoketene dithioacetals: a route to the regioselective synthesis of functionalized trifluoromethylated pyrazoles
Source: Royal Society of Chemistry journal article supplement (doi:10.1039/c7ra01130j), 2017-01-01
Supplement: c7ra01130j1.pdf [file c7ra01130j1.pdf]

## Supporting Information

### Efficient trifluoromethylation of C(sp<sup>2</sup>)-H functionalized $\alpha$ -oxoketene dithioacetals : route to regioselective synthesis of trifluoromethylated pyrazoles

Nutan Sharma,<sup>a</sup> Neelam Kumari,<sup>b</sup> Tejpal Singh Chundawat,<sup>c</sup> Sushil Kumar<sup>d</sup> and Sunita Bhagat<sup>a\*</sup>

<sup>a</sup>Organic Synthesis Research Laboratory, Department of Chemistry, A.R.S.D. College, University of Delhi, New Delhi-110021, India.

<sup>b</sup>Institute of Nuclear Medicine & Allied Sciences, Defence Research & Development Organization, Brig. SK Mazumdar Marg, Delhi-110054, India

<sup>c</sup>Department of Applied Sciences, THE NORTHCAP UNIVERSITY (formerly ITM University), Gurgaon-122001, Haryana, India

<sup>d</sup>Physical Chemistry Division, CSIR-National Chemical Laboratory, Dr. Homi Bhabha Road, Pune-411008, India

Email id: sunitabhagat28@gmail.com

| S. No. |                                                                           | Page No. |
|--------|---------------------------------------------------------------------------|----------|
| 1.     | X-ray crystallographic data of <b>3l</b>                                  | 2-3      |
| 2.     | X-ray crystallographic data of <b>4i</b>                                  | 4-5      |
| 3.     | References                                                                | 6-6      |
| 4.     | General Procedure & Experimental data of compounds ( <b>2a-l</b> )        | 7-10     |
| 5.     | General Procedure & Experimental data of compounds ( <b>3a-l</b> )        | 10-14    |
| 6.     | General Procedure & Experimental data of compounds ( <b>4a-l</b> )        | 15-19    |
| 7.     | Copies of <sup>1</sup> H and <sup>13</sup> C NMRs ( <b>2a-l</b> )         | 21-32    |
| 8.     | Copies of <sup>1</sup> H, <sup>13</sup> C NMR & HRMS data ( <b>3a-l</b> ) | 33-56    |
| 9.     | Copies of <sup>1</sup> H, <sup>13</sup> C NMR & HRMS data ( <b>4a-l</b> ) | 57-80    |

# X-ray Crystallographic Studies

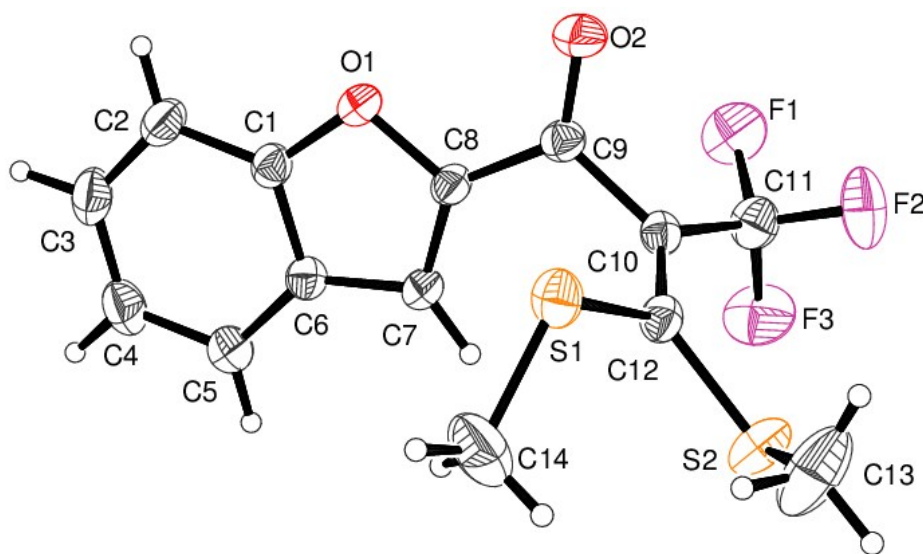

**Figure 1. ORTEP Structure of compound 31**

The intensity data for 31 was collected on an Oxford Xcalibur CCD diffractometer equipped with graphite monochromatic Mo-K $\alpha$  radiation ( $\lambda = 0.71073 \text{ \AA}$ ) at 293(2) K<sup>1</sup>. A multi-scan correction was applied. The structure was solved by the direct methods using SIR-92 and refined by full-matrix least-squares refinement techniques on  $F^2$  using SHELXL97<sup>2</sup>. The hydrogen atoms were placed into the calculated positions and included in the last cycles of the refinement. All calculations were done using Wingx software package<sup>3</sup>.

**Table 1.** Crystal data and structure refinement for compound **3I**

|                                                                     |                                                                              |
|---------------------------------------------------------------------|------------------------------------------------------------------------------|
| Empirical formula                                                   | C <sub>14</sub> H <sub>11</sub> F <sub>3</sub> O <sub>2</sub> S <sub>2</sub> |
| Formula weight                                                      | 332.35                                                                       |
| Temperature                                                         | 293(2) K                                                                     |
| Wavelength                                                          | 0.71073 Å                                                                    |
| Crystal system                                                      | Orthorhombic                                                                 |
| Space group                                                         | <i>P b c a</i>                                                               |
| <i>a</i>                                                            | 13.456(5) Å                                                                  |
| <i>b</i>                                                            | 10.034(5) Å                                                                  |
| <i>c</i>                                                            | 22.429(5) Å                                                                  |
| $\alpha$                                                            | 90(5)°                                                                       |
| $\beta$                                                             | 90(5)°                                                                       |
| $\gamma$                                                            | 90(5)°                                                                       |
| Volume                                                              | 3028(2) Å <sup>3</sup>                                                       |
| <i>Z</i>                                                            | 8                                                                            |
| Density (calculated)                                                | 1.458 Mg/m <sup>3</sup>                                                      |
| Absorption coefficient                                              | 0.383 mm <sup>-1</sup>                                                       |
| <i>F</i> (000)                                                      | 1360                                                                         |
| Crystal size                                                        | 0.22 x 0.20 x 0.18 mm <sup>3</sup>                                           |
| Theta range for data collection                                     | 3.12 to 25.00°                                                               |
| Index ranges                                                        | -16 ≤ <i>h</i> ≤ 15, -11 ≤ <i>k</i> ≤ 11, -21 ≤ <i>l</i> ≤ 26                |
| Reflections collected                                               | 9837                                                                         |
| Independent reflections                                             | 2653 [ <i>R</i> (int) = 0.0226]                                              |
| Completeness to theta = 25.00°                                      | 99.8 %                                                                       |
| Absorption correction                                               | Multi-scan                                                                   |
| Max. and min. transmission                                          | 0.9342 and 0.9204                                                            |
| Refinement method                                                   | Full-matrix least-squares on <i>F</i> <sup>2</sup>                           |
| Data / restraints / parameters                                      | 2653 / 0 / 190                                                               |
| Goodness-of-fit on <i>F</i> <sup>2</sup>                            | 1.087                                                                        |
| Final <i>R</i> indices [ <i>I</i> > 2σ( <i>I</i> )] <sup>a, b</sup> | <i>R</i> <sub>1</sub> = 0.0470, <i>wR</i> <sub>2</sub> = 0.1121              |
| <i>R</i> indices (all data)                                         | <i>R</i> <sub>1</sub> = 0.0583, <i>wR</i> <sub>2</sub> = 0.1175              |
| Largest diff. peak and hole                                         | 0.205 and -0.180 e.Å <sup>-3</sup>                                           |

$$^a R = \sum(|F_o| - |F_c|) / \sum |F_o|; \quad ^b wR = \{ \sum [w(F_o^2 - F_c^2)^2] / \sum [w(F_o^2)] \}^{1/2}$$

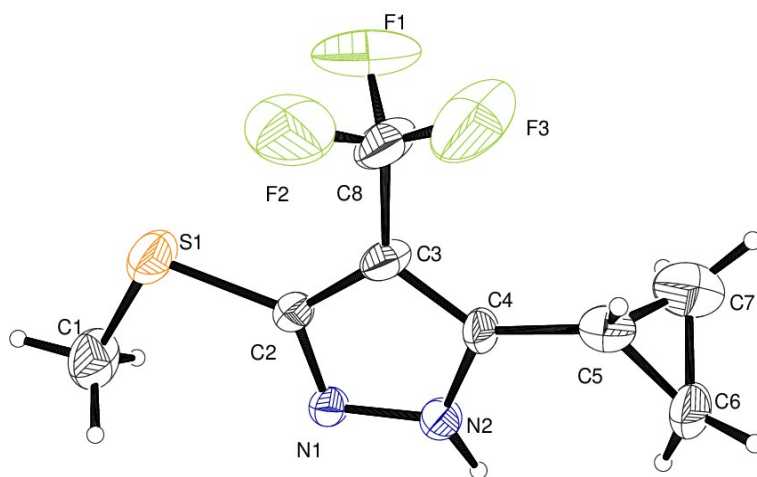

**Figure 2. ORTEP drawings of compound 4i**

The intensity data for was collected on an Oxford CCD diffractometer equipped with Xcalibur Sapphire diffraction measurement device graphite monochromatic Mo-K $\alpha$  radiation ( $\lambda = 0.71073 \text{ \AA}$ ) at 293(2) K<sup>1</sup>. A multi-scan correction was applied. The structure was solved by the direct methods using SIR-92 and refined by full-matrix least-squares refinement techniques on  $F^2$  using SHELXL97<sup>2</sup>. The hydrogen atoms were placed into the calculated positions and included in the last cycles of the refinement. All calculations were done using Wingx software package<sup>3</sup>.

**Table 2.** Crystallographic data and structure refinement for compounds **4i**

|                                                                     |                                                                 |
|---------------------------------------------------------------------|-----------------------------------------------------------------|
| Empirical formula                                                   | C <sub>8</sub> H <sub>9</sub> N <sub>2</sub> F <sub>3</sub> S   |
| Formula weight                                                      | 222.23                                                          |
| Temperature                                                         | 293(2) K                                                        |
| Wavelength                                                          | 0.71073 Å                                                       |
| Crystal system                                                      | Monoclinic                                                      |
| Space group                                                         | <i>P</i> 2/c                                                    |
| <i>a</i>                                                            | 19.392(5) Å                                                     |
| <i>b</i>                                                            | 12.369(5) Å                                                     |
| <i>c</i>                                                            | 18.099(5) Å                                                     |
| $\alpha$                                                            | 90(5)°                                                          |
| $\beta$                                                             | 110.204(5)°                                                     |
| $\gamma$                                                            | 90(5)°                                                          |
| Volume                                                              | 4074(2) Å <sup>3</sup>                                          |
| <i>Z</i>                                                            | 16                                                              |
| Density (calculated)                                                | 1.449 Mg/m <sup>3</sup>                                         |
| Absorption coefficient                                              | 0.323 mm <sup>-1</sup>                                          |
| <i>F</i> (000)                                                      | 1824                                                            |
| Crystal size                                                        | 0.22 x 0.21 x 0.20 mm <sup>3</sup>                              |
| Theta range for data collection                                     | 2.98 to 25.00°                                                  |
| Index ranges                                                        | -21 ≤ <i>h</i> ≤ 23, -14 ≤ <i>k</i> ≤ 14, -21 ≤ <i>l</i> ≤ 21   |
| Reflections collected                                               | 24995                                                           |
| Independent reflections                                             | 6891 [ <i>R</i> (int) = 0.0832]                                 |
| Completeness to theta = 25.00°                                      | 95.9 %                                                          |
| Absorption correction                                               | Multi-scan                                                      |
| Max. and min. transmission                                          | 0.9382 and 0.9323                                               |
| Refinement method                                                   | Full-matrix least-squares on <i>F</i> <sup>2</sup>              |
| Data / restraints / parameters                                      | 6891 / 2 / 523                                                  |
| Goodness-of-fit on <i>F</i> <sup>2</sup>                            | 1.041                                                           |
| Final <i>R</i> indices [ <i>I</i> > 2σ( <i>I</i> )] <sup>a, b</sup> | <i>R</i> <sub>1</sub> = 0.1116, <i>wR</i> <sub>2</sub> = 0.2682 |
| <i>R</i> indices (all data)                                         | <i>R</i> <sub>1</sub> = 0.2134, <i>wR</i> <sub>2</sub> = 0.3318 |
| Largest diff. peak and hole                                         | 0.417 and -0.278 e.Å <sup>-3</sup>                              |

$${}^a R = \sum (\|F_o\| - |F_c|) / \sum |F_o|; {}^b wR = \{\sum [w(F_o^2 - F_c^2)^2] / \sum [w(F_o^2)^2]\}^{1/2}$$

## References :

1. CrysAlispro, *Agilent Technologies*, Version 1.171.34.49 (2011).
2. Sheldrick, G. M. *Acta Cryst.* **2008**, *A64*, 112-122.
3. Farrugia, L.J. WinGX Version 1.80.05, *An integrated system of Windows Programs for the Solution, Refinement and Analysis of Single Crystal X-Ray Diffraction Data*; Department of Chemistry, University of Glasgow (1997-2009).

### General procedure for the synthesis of $\alpha$ -iodo substituted oxoketene dithioacetals (2a-l)

To a stirred solution of substituted oxoketene dithioacetal (1equiv.) in  $\text{CHCl}_3$ , N-iodosuccinimide (1.2equiv.) was added portionwise at rt. Colour of the reaction mixture changes to dark brown. Reaction mixture was stirred at rt for 1hr. Progress of reaction was monitored by TLC. After consumption of starting material, solvent was evaporated and crude compound was directly purified by column chromatography using silica gel (100: 200 mesh) in n-Hexane to afford **2a-l** as pure compound.

#### Analytical data of $\alpha$ -iodo substituted oxoketene dithioacetals (2a-l)

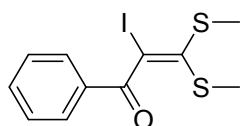

#### **2-iodo-3,3-bis(methylthio)-1-phenylprop-2-en-1-one (2a)** :

The compound was obtained as a yellow viscous material, yield : (718 mg, 92%) ;  $^1\text{H NMR}$  (400 MHz,  $\text{CDCl}_3$ )  $\delta$ : 7.84 (d,  $J = 7.93$  Hz, 1H), 7.79 (d,  $J = 7.93$  Hz, 1H), 7.26 (d,  $J = 7.93$  Hz, 3H), 2.45 (s, 3H, -SCH<sub>3</sub>), 2.13 (s, 3H, -SCH<sub>3</sub>);  $^{13}\text{C NMR}$  (100 MHz,  $\text{CDCl}_3$ )  $\delta$ : 185.3, 165.3, 142.2, 136.5, 129.0, 127.7, 95.2 (vinylic CI), 17.2 (-SCH<sub>3</sub>), 14.9 (-SCH<sub>3</sub>).

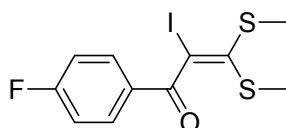

#### **1-(4-fluorophenyl)-2-iodo-3,3-bis(methylthio)prop-2-en-1-one (2b)** :

The compound was obtained as a pale yellow liquid, yield : (706 mg, 93%) ;  $^1\text{H NMR}$  (400 MHz,  $\text{CDCl}_3$ )  $\delta$ : 7.86 (dd,  $J = 8.24, 2.75$  Hz, 2H), 7.08 (t,  $J = 8.24$ , 2H), 2.41 (s, 3H, -SCH<sub>3</sub>), 2.07 (s, 3H, -SCH<sub>3</sub>);  $^{13}\text{C NMR}$  (100 MHz,  $\text{CDCl}_3$ )  $\delta$ : 189.0, 167.2, 164.6, 142.5, 132.4, 130.3, 116.0, 115.8, 96.7 (vinylic C-I), 19.3 (-SCH<sub>3</sub>), 17.3 (-SCH<sub>3</sub>).

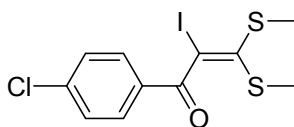

#### **1-(4-chlorophenyl)-2-iodo-3,3-bis(methylthio)prop-2-en-1-one (2c)** :

The compound was obtained as a yellow liquid, yield : (698 mg, 94%) ;  $^1\text{H NMR}$  (400 MHz,  $\text{CDCl}_3$ )  $\delta$ : 7.81 (d,  $J = 8.70$  Hz, 2H), 7.42 (d,  $J = 8.70$  Hz, 2H),

2.45 (s, 3H, -SCH<sub>3</sub>), 2.11 (s, 3H, -SCH<sub>3</sub>); <sup>13</sup>C NMR (100 MHz, CDCl<sub>3</sub>) δ: 189.2, 142.9, 140.1, 132.4, 131.0, 129.1, 96.4 (vinylic C-I), 19.3 (-SCH<sub>3</sub>), 17.3 (-SCH<sub>3</sub>).

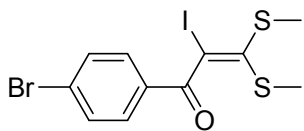

**1-(4-bromophenyl)-2-iodo-3,3-bis(methylthio)prop-2-en-1-**

**one (2d)** : The compound was obtained as a brown solid, yield : (643 mg, 91%) ; mp 50-52°C; <sup>1</sup>H NMR (400 MHz, CDCl<sub>3</sub>) δ: 7.74 (d, *J* = 8.70, 2H), 7.59 (d, *J* = 8.70, 2H), 2.46 (s, 3H, -SCH<sub>3</sub>), 2.12 (s, 3H, -SCH<sub>3</sub>); <sup>13</sup>C NMR (100 MHz, CDCl<sub>3</sub>) δ: 189.4, 142.9, 132.8, 132.1, 131.1, 128.9, 96.4 (vinylic C-I), 19.3 (-SCH<sub>3</sub>), 17.3 (-SCH<sub>3</sub>).

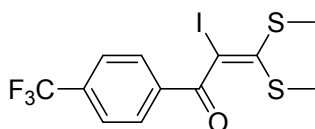

**2-iodo-3,3-bis(methylthio)-1-(4-**

**(trifluoromethyl)phenyl)prop-2-en-1-one (2e)** : The compound was obtained as a pale yellow liquid, yield : (665 mg, 93%) ; <sup>1</sup>H NMR (400 MHz, CDCl<sub>3</sub>) δ: 7.98 (d, *J* = 8.24, 2H), 7.72 (d, *J* = 8.24, 2H), 2.47 (s, 3H, -SCH<sub>3</sub>), 2.10 (s, 3H, -SCH<sub>3</sub>); <sup>13</sup>C NMR (100 MHz, CDCl<sub>3</sub>) δ: 189.2, 143.8, 137.1, 134.8, 134.5, 129.9, 125.7, 124.8, 122.2, 95.8 (vinylic C-I), 19.3 (-SCH<sub>3</sub>), 17.4 (-SCH<sub>3</sub>).

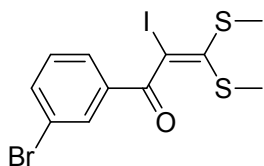

**1-(3-bromophenyl)-2-iodo-3,3-bis(methylthio)prop-2-en-1-one**

**(2f)** : The compound was obtained as a light yellow solid, yield : (665 mg, 94%) ; mp 54-56°C; <sup>1</sup>H NMR (400 MHz, CDCl<sub>3</sub>) δ: 7.91 (t, *J* = 1.83 Hz, 1H), 7.67 (dt, *J* = 7.79, 2.75, 1H), 7.57 (dq, *J* = 7.79, 2.75, 1H), 7.24 (t, *J* = 7.79, 1H), 2.37 (s, 3H, -SCH<sub>3</sub>), 2.05 (s, 3H, -SCH<sub>3</sub>); <sup>13</sup>C NMR (100 MHz, CDCl<sub>3</sub>) δ: 188.9, 143.5, 136.3, 136.0, 132.3, 130.2, 128.2, 122.9, 96.0 (vinylic C-I), 19.3 (-SCH<sub>3</sub>), 17.3 (-SCH<sub>3</sub>).



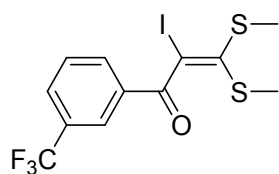

**2-iodo-3,3-bis(methylthio)-1-(3-(trifluoromethyl)phenyl)prop-**

**2-en-1-one (2g)** : The compound was obtained as yellow liquid, yield : (644 mg, 90%) ; <sup>1</sup>H NMR (400 MHz, CDCl<sub>3</sub>) δ: 8.14 (s, 1H), 8.04 (d, *J* = 8.39, 1H), 7.81 (d, *J* = 7.63, 1H), 7.61 (t, *J* = 7.63, 1H), 2.48 (s, 3H, -SCH<sub>3</sub>), 2.10 (s, 3H, -SCH<sub>3</sub>); <sup>13</sup>C NMR (100 MHz, CDCl<sub>3</sub>) δ: 189.0, 143.9, 134.8, 132.8, 131.5, 129.9, 129.3, 126.2, 124.9, 95.6 (vinylic C-I), 19.2 (-SCH<sub>3</sub>), 17.4 (-SCH<sub>3</sub>).

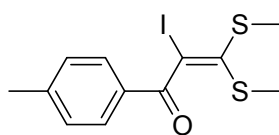

**2-iodo-3,3-bis(methylthio)-1-(p-tolyl)prop-2-en-1-one (2h)** :

The compound was obtained as a yellow liquid, yield : (687 mg, 90%) ; <sup>1</sup>H NMR (400 MHz, CDCl<sub>3</sub>) δ: 7.78 (d, *J* = 8.24, 2H), 7.25 (d, *J* = 8.24, 2H), 2.45 (s, 3H, -SCH<sub>3</sub>), 2.40 (s, 3H, Ar-CH<sub>3</sub>), 2.11 (s, 3H, -SCH<sub>3</sub>); <sup>13</sup>C NMR (100 MHz, CDCl<sub>3</sub>) δ: 190.1, 144.7, 141.7, 131.3, 129.9, 129.4, 97.8 (vinylic C-I), 21.7 (Ar-CH<sub>3</sub>), 19.3 (-SCH<sub>3</sub>), 17.3 (-SCH<sub>3</sub>).

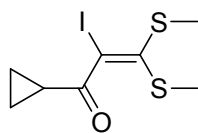

**1-cyclopropyl-2-iodo-3,3-bis(methylthio)prop-2-en-1-one (2i)** :

The compound was obtained as a yellow liquid, yield : (792 mg, 95%) ; <sup>1</sup>H NMR (400 MHz, CDCl<sub>3</sub>) δ: 2.39 (s, 3H, SCH<sub>3</sub>), 2.25 (s, 3H, SCH<sub>3</sub>), 2.16-2.12 (m, 1H, cyclopropyl CH), 1.20-1.16 (m, 2H, cyclopropyl CH<sub>2</sub>), 1.01-0.96 (s, 2H, cyclopropyl CH<sub>2</sub>); <sup>13</sup>C NMR (100 MHz, CDCl<sub>3</sub>) δ: 206.9, 200.4, 100.5 (vinylic C-I), 30.8 (cyclopropyl CH), 19.7 (-SCH<sub>3</sub>), 17.6 (-SCH<sub>3</sub>), 13.1 (cyclopropyl CH<sub>2</sub>).

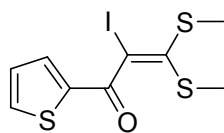

**2-iodo-3,3-bis(methylthio)-1-(thiophen-2-yl)prop-2-en-1-one (2j)**

: The compound was obtained as a yellow liquid, yield : (711 mg, 92%) ; <sup>1</sup>H NMR (400 MHz, CDCl<sub>3</sub>) δ: 7.68 (d, *J* = 5.04 Hz, 1H), 7.61 (d, *J* = 4.58, 1H), 7.11(t, *J* =

4.58, 1H), 2.45 (s, 3H, -SCH<sub>3</sub>), 2.17 (s, 3H, -SCH<sub>3</sub>); <sup>13</sup>C NMR (100 MHz, CDCl<sub>3</sub>) δ: 183.4, 143.2, 140.9, 135.2, 134.4, 128.3, 95.8 (vinylic C-I), 19.6 (-SCH<sub>3</sub>), 17.4 (-SCH<sub>3</sub>).

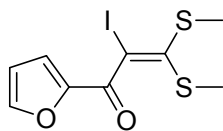

**1-(furan-2-yl)-2-iodo-3,3-bis(methylthio)prop-2-en-1-one (2k) :**

The compound was obtained as a yellow liquid, yield : (722 mg, 91%) ; <sup>1</sup>H NMR (400 MHz, CDCl<sub>3</sub>) δ: 7.63 (t, *J* = 1.83 Hz, 1H), 7.14 (d, *J* = 3.66 Hz, 1H), 6.54 (dd, *J* = 3.66, 1.83 Hz, 1H), 2.45 (s, 3H, -SCH<sub>3</sub>), 2.18 (s, 3H, -SCH<sub>3</sub>); <sup>13</sup>C NMR (100 MHz, CDCl<sub>3</sub>) δ: 178.7, 149.7, 147.7, 144.2, 120.2, 112.6, 94.8 (vinylic C-I), 19.6 (-SCH<sub>3</sub>), 17.4 (-SCH<sub>3</sub>).

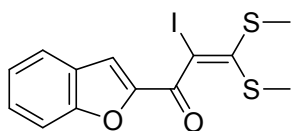

**1-(benzofuran-2-yl)-2-iodo-3,3-bis(methylthio)prop-2-en-1-**

**one (2l) :** The compound was obtained as a yellow viscous material, yield : (686 mg, 93%) ; <sup>1</sup>H NMR (400 MHz, CDCl<sub>3</sub>) δ: 7.68 (d, *J* = 7.79 Hz, 1H), 7.57 (d, *J* = 8.70 Hz, 1H), 7.48-7.44 (m, 2H), 7.29 (t, *J* = 7.79 Hz, 1H), 2.48 (s, 3H, -SCH<sub>3</sub>), 2.18 (s, 3H, -SCH<sub>3</sub>); <sup>13</sup>C NMR (100 MHz, CDCl<sub>3</sub>) δ: 180.5, 156.2, 149.9, 145.2, 128.6, 126.9, 124.0, 123.4, 115.9, 112.5, 94.2 (vinylic C-I), 19.7 (-SCH<sub>3</sub>), 17.4 (-SCH<sub>3</sub>).

### **General procedure for synthesis of trifluoromethylated $\alpha$ -oxoketene dithioacetals (3a-l)**

To a solution of compound **2** (1equiv.) in DMF, CuI (1.2equiv.) was added portionwise. After stirring for 5 minutes, FSO<sub>2</sub>CF<sub>2</sub>COOMe (1.5equiv.) was added dropwise at rt and reaction mass was heated to 90°C and stirred for 2-3hrs. Progress of reaction was monitored by TLC. After consumption of starting material **2**, crude was quenched with NH<sub>4</sub>OAc and extracted with EtOAc. Organic layer was washed with water. Combined organic layers were concentrated and crude was purified by column chromatography using 5% EtOAc: Hexane in silica gel(100:200) mesh to afford **3a-l** as pure compound.

### Analytical data of trifluoromethylated $\alpha$ -oxoketene dithioacetals (3a-l)

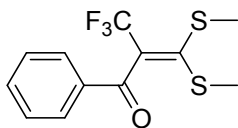

**3,3-bis(methylthio)-1-phenyl-2-(trifluoromethyl)prop-2-en-1-one (3a)**

: The compound was obtained as a light yellow solid, yield : (434 mg, 80%) ; mp 77-79°C; **IR** ( $\nu_{\max}$ cm<sup>-1</sup>) (CHCl<sub>3</sub>): 2927, 1672 ; **<sup>1</sup>H NMR** (400 MHz, CDCl<sub>3</sub>)  $\delta$ : 7.89 (d,  $J$  = 8.54, 2H), 7.59 (t,  $J$  = 7.32 Hz, 1H), 7.48 (t,  $J$  = 7.32, 2H), 2.44 (s, 3H, -SCH<sub>3</sub>), 2.16 (s, 3H, -SCH<sub>3</sub>) ; **<sup>13</sup>C NMR** (100 MHz, DMSO-d<sub>6</sub>)  $\delta$ : 188.2, 151.2, 135.0, 132.2, 130.5, 129.2, 125.9, 122.2 (vinylic C-CF<sub>3</sub>), 119.5 (-CF<sub>3</sub>), 17.2 (-SCH<sub>3</sub>), 16.9 (-SCH<sub>3</sub>) ; **HRMS** (ESI) (M+H)<sup>+</sup> Calcd for C<sub>12</sub>H<sub>11</sub>F<sub>3</sub>OS<sub>2</sub>: 293.0281, found 293.0282.

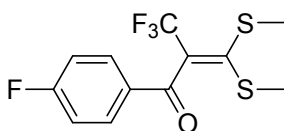

**1-(4-fluorophenyl)-3,3-bis(methylthio)-2-(trifluoromethyl)prop-2-en-1-one (3b)**

: The compound was obtained as a pale yellow viscous material, yield : (465 mg, 85%) ; **IR** ( $\nu_{\max}$ cm<sup>-1</sup>) (CHCl<sub>3</sub>): 2925, 1671 ; **<sup>1</sup>H NMR** (400 MHz, CDCl<sub>3</sub>)  $\delta$ : 7.92 (dd,  $J$  = 8.24, 2.75 Hz, 2H), 7.15 (t,  $J$  = 8.24, 2H), 2.44 (s, 3H, -SCH<sub>3</sub>), 2.18 (s, 3H, -SCH<sub>3</sub>) ; **<sup>13</sup>C NMR** (100 MHz, CDCl<sub>3</sub>)  $\delta$ : 187.8, 167.5, 164.9, 150.8, 132.6, 131.8, 122.2 (vinylic C-CF<sub>3</sub>), 119.5 (-CF<sub>3</sub>), 116.2, 116.0, 17.2 (-SCH<sub>3</sub>), 16.9 (-SCH<sub>3</sub>) ; **HRMS** (ESI) (M+H)<sup>+</sup> Calcd for C<sub>12</sub>H<sub>10</sub>F<sub>4</sub>OS<sub>2</sub>: 311.0187, found 311.0177.

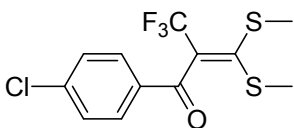

**1-(4-chlorophenyl)-3,3-bis(methylthio)-2-(trifluoromethyl)prop-2-en-1-one (3c)**

: The compound was obtained as a yellow solid, yield : (463 mg, 84%) ; mp 50-52°C; **IR** ( $\nu_{\max}$ cm<sup>-1</sup>) (CHCl<sub>3</sub>): 2927, 1685 ; **<sup>1</sup>H NMR** (400 MHz, CDCl<sub>3</sub>)  $\delta$ : 7.83 (d,  $J$  = 8.24 Hz, 2H), 7.45 (d,  $J$  = 8.70 Hz, 2H), 2.44 (s, 3H, -SCH<sub>3</sub>), 2.17 (s, 3H, -SCH<sub>3</sub>) ; **<sup>13</sup>C NMR** (100 MHz, CDCl<sub>3</sub>)  $\delta$ : 181.1, 151.0, 140.4, 134.6, 130.4, 129.2, 122.0 (vinylic C-CF<sub>3</sub>), 119.5 (-CF<sub>3</sub>), 17.2 (-SCH<sub>3</sub>), 17.0 (-SCH<sub>3</sub>) ; **HRMS** (ESI) (M+H)<sup>+</sup> Calcd for C<sub>12</sub>H<sub>10</sub>ClF<sub>3</sub>OS<sub>2</sub>: 326.9892, found 326.9898.

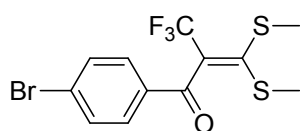

**1-(4-bromophenyl)-3,3-bis(methylthio)-2-(trifluoromethyl)prop-**

**2-en-1-one (3d)** : The compound was obtained as a light yellow viscous material, yield : (446 mg, 86%) ; **IR** ( $\nu_{\max}$ cm<sup>-1</sup>) (CHCl<sub>3</sub>): 2927, 1672 ; **<sup>1</sup>H NMR** (400 MHz, CDCl<sub>3</sub>)  $\delta$ : 7.75 (d,  $J$  = 8.70, 2H), 7.62 (d,  $J$  = 8.70, 2H), 2.43 (s, 3H, -SCH<sub>3</sub>), 2.17 (s, 3H, -SCH<sub>3</sub>); **<sup>13</sup>C NMR** (100 MHz, CDCl<sub>3</sub>)  $\delta$ : 188.2, 151.2, 135.0, 132.2, 130.5, 129.2, 125.9, 122.2 (vinylic C-CF<sub>3</sub>), 119.5 (-CF<sub>3</sub>), 17.2 (-SCH<sub>3</sub>), 16.9 (-SCH<sub>3</sub>) ; **HRMS** (ESI) (M+H)<sup>+</sup> Calcd for C<sub>12</sub>H<sub>10</sub>ClF<sub>3</sub>OS<sub>2</sub>: 370.9387, found 370.9381.

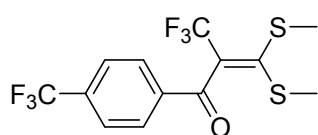

**3,3-bis(methylthio)-2-(trifluoromethyl)-1-(4-**

**(trifluoromethyl)phenyl)prop-2-en-1-one (3e)** : The compound was obtained as a yellow solid, yield : (444 mg, 86%) ; **IR** ( $\nu_{\max}$ cm<sup>-1</sup>) (CHCl<sub>3</sub>): 2826, 1685 ; **<sup>1</sup>H NMR** (400 MHz, CDCl<sub>3</sub>)  $\delta$ : 7.99 (d,  $J$  = 8.24, 2H), 7.74 (d,  $J$  = 8.24, 2H), 2.45 (s, 3H, -SCH<sub>3</sub>), 2.16 (s, 3H, -SCH<sub>3</sub>); **<sup>13</sup>C NMR** (100 MHz, CDCl<sub>3</sub>)  $\delta$ : 188.1, 152.0, 139.0, 135.1, 134.7, 131.0, 130.7, 129.2, 125.9, 124.8, 122.2, 122.0 (vinylic C-CF<sub>3</sub>), 119.5 (-CF<sub>3</sub>), 17.2 (-SCH<sub>3</sub>), 17.0 (-SCH<sub>3</sub>) ; **HRMS** (ESI) (M+H)<sup>+</sup> Calcd for C<sub>13</sub>H<sub>10</sub>F<sub>6</sub>OS<sub>2</sub>: 361.0155, found 361.0156.

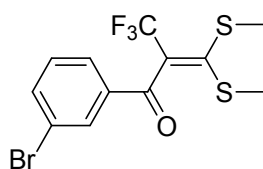

**1-(3-bromophenyl)-3,3-bis(methylthio)-2-(trifluoromethyl)prop-2-**

**en-1-one (3f)** : The compound was obtained as a light yellow viscous material, yield : (441 mg, 85%) ; **IR** ( $\nu_{\max}$ cm<sup>-1</sup>) (CHCl<sub>3</sub>): 2925, 1670 ; **<sup>1</sup>H NMR** (400 MHz, CDCl<sub>3</sub>)  $\delta$ : 8.04 (d,  $J$  = 1.53 Hz, 1H), 7.77 (d,  $J$  = 7.63, 1H), 7.71 (d,  $J$  = 7.63, 1H), 7.36 (t,  $J$  = 7.63, 1H), 2.45 (s, 3H, -SCH<sub>3</sub>), 2.17 (s, 3H, -SCH<sub>3</sub>); **<sup>13</sup>C NMR** (100 MHz, CDCl<sub>3</sub>)  $\delta$ : 187.8, 151.6, 138.0, 136.6, 131.8, 130.3, 127.6, 123.1, 122.2 (vinylic C-CF<sub>3</sub>), 119.5 (-CF<sub>3</sub>), 17.2 (-SCH<sub>3</sub>), 16.9 (-SCH<sub>3</sub>) ; **HRMS** (ESI) (M+H)<sup>+</sup> Calcd for C<sub>12</sub>H<sub>10</sub>BrF<sub>3</sub>OS<sub>2</sub>: 370.9387, found 370.9389.

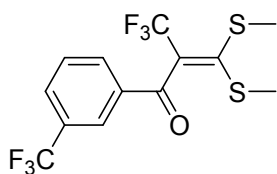

**3,3-bis(methylthio)-2-(trifluoromethyl)-1-(3-(trifluoromethyl)phenyl)prop-2-en-1-one (3g)** : The compound was obtained as a pale yellow solid, yield : (429 mg, 83%) ; **IR** ( $\nu_{\max}$ cm<sup>-1</sup>) (CHCl<sub>3</sub>): 2925, 1680 ; **<sup>1</sup>H NMR** (400 MHz, CDCl<sub>3</sub>)  $\delta$ : 8.15 (s, 1H), 8.04 (d,  $J = 7.63$ , 1H), 7.84 (d,  $J = 7.63$ , 1H), 7.63 (t,  $J = 8.01$ , 1H), 2.45 (s, 3H, -SCH<sub>3</sub>), 2.16 (s, 3H, -SCH<sub>3</sub>); **<sup>13</sup>C NMR** (100 MHz, CDCl<sub>3</sub>)  $\delta$ : 187.8, 152.2, 136.8, 132.1, 131.7, 131.4, 130.8, 130.5, 130.1, 129.5, 125.6, 122.1 (vinylic C-CF<sub>3</sub>), 119.6 (vinylic CF<sub>3</sub>), 17.1 (-SCH<sub>3</sub>), 17.0 (-SCH<sub>3</sub>) ; **HRMS** (ESI) (M+H)<sup>+</sup> Calcd for C<sub>13</sub>H<sub>10</sub>F<sub>6</sub>OS<sub>2</sub>: 361.0155, found 361.0156.

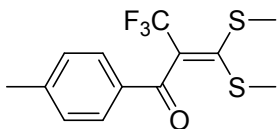

**3,3-bis(methylthio)-1-(p-tolyl)-2-(trifluoromethyl)prop-2-en-1-one (3h)**: The compound was obtained as a yellow liquid, yield : (413 mg, 82%) ; **IR** ( $\nu_{\max}$ cm<sup>-1</sup>) (CHCl<sub>3</sub>): 2928, 1665 ; **<sup>1</sup>H NMR** (400 MHz, CDCl<sub>3</sub>)  $\delta$ : 7.74 (d,  $J = 8.39$ , 2H), 7.21 (d,  $J = 7.63$ , 2H), 2.40 (s, 3H, -SCH<sub>3</sub>), 2.35 (s, 3H, Ar-CH<sub>3</sub>), 2.06 (s, 3H, -SCH<sub>3</sub>); **<sup>13</sup>C NMR** (100 MHz, CDCl<sub>3</sub>)  $\delta$ : 190.1, 144.7, 141.7, 131.3, 129.9, 129.4, 125.9, 122.4 (vinylic C-CF<sub>3</sub>), 119.4 (-CF<sub>3</sub>), 21.7 (Ar-CH<sub>3</sub>), 19.3 (-SCH<sub>3</sub>), 17.3 (-SCH<sub>3</sub>) ; **HRMS** (ESI) (M+H)<sup>+</sup> Calcd for C<sub>13</sub>H<sub>13</sub>F<sub>3</sub>OS<sub>2</sub>: 307.0438, found 307.0457.

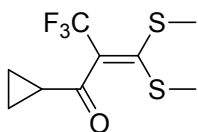

**1-cyclopropyl-3,3-bis(methylthio)-2-(trifluoromethyl)prop-2-en-1-one (3i)** : The compound was obtained as a yellow liquid, yield : (491 mg, 86%) ; **IR** ( $\nu_{\max}$ cm<sup>-1</sup>) (CHCl<sub>3</sub>): 2884, 1692 ; **<sup>1</sup>H NMR** (400 MHz, CDCl<sub>3</sub>)  $\delta$ : 2.36 (s, 6H, 2 x SCH<sub>3</sub>), 2.12-2.07 (m, 1H, cyclopropyl CH), 1.22-1.18 (m, 2H, cyclopropyl CH<sub>2</sub>), 1.05-1.00 (m, 2H, cyclopropyl CH<sub>2</sub>); **<sup>13</sup>C NMR** (100 MHz, CDCl<sub>3</sub>)  $\delta$ : 198.9, 150.3, 122.4 (vinylic C-CF<sub>3</sub>), 119.7 (vinylic CF<sub>3</sub>), 22.5 (cyclopropyl CH), 17.3 (-SCH<sub>3</sub>), 12.7 (cyclopropyl CH<sub>2</sub>) ; **HRMS** (ESI) (M+H)<sup>+</sup> Calcd for C<sub>9</sub>H<sub>11</sub>F<sub>3</sub>OS<sub>2</sub>: 257.0281, found 257.0280.

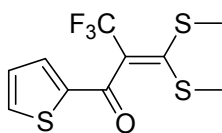

**3,3-bis(methylthio)-1-(thiophen-2-yl)-2-(trifluoromethyl)prop-2-en-1-**

**one (3j)** : The compound was obtained as a yellow liquid, yield : (462 mg, 85%) ; **IR** ( $\nu_{\max}$ cm<sup>-1</sup>) (CHCl<sub>3</sub>): 2885, 1665 ; **<sup>1</sup>H NMR** (400 MHz, CDCl<sub>3</sub>)  $\delta$ : 7.71 (d,  $J$  = 5.34 Hz, 1H), 7.60 (d,  $J$  = 3.81, 1H), 7.12 (t,  $J$  = 3.81, 1H), 2.43 (s, 3H, -SCH<sub>3</sub>), 2.22 (s, 3H, -SCH<sub>3</sub>) ; **<sup>13</sup>C NMR** (100 MHz, CDCl<sub>3</sub>)  $\delta$ : 181.4, 151.5, 143.4, 135.6, 134.1, 128.3, 122.2 (vinylic C-CF<sub>3</sub>), 119.5 (-CF<sub>3</sub>), 17.4 (-SCH<sub>3</sub>), 16.9 (-SCH<sub>3</sub>) ; **HRMS** (ESI) (M+H)<sup>+</sup> Calcd for C<sub>10</sub>H<sub>9</sub>F<sub>3</sub>OS<sub>2</sub>: 298.9846, found 298.9839.

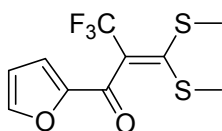

**1-(furan-2-yl)-3,3-bis(methylthio)-2-(trifluoromethyl)prop-2-en-1-one**

**(3k)** : The compound was obtained as a yellow liquid, yield : (453 mg, 84%) ; **IR** ( $\nu_{\max}$ cm<sup>-1</sup>) (CHCl<sub>3</sub>): 2878, 1655 ; **<sup>1</sup>H NMR** (400 MHz, CDCl<sub>3</sub>)  $\delta$ : 7.64 (t,  $J$  = 1.83 Hz, 1H), 7.15 (d,  $J$  = 3.66 Hz, 1H), 6.55 (q,  $J$  = 3.66, 1.83 Hz, 1H), 2.42 (s, 3H), 2.23 (s, 3H) ; **<sup>13</sup>C NMR** (100 MHz, CDCl<sub>3</sub>)  $\delta$ : 176.5, 152.6, 151.9, 147.9, 130.8, 130.4, 122.3 (vinylic C-CF<sub>3</sub>), 119.9 (-CF<sub>3</sub>), 112.7, 17.5 (-SCH<sub>3</sub>), 16.9 (-SCH<sub>3</sub>) ; **HRMS** (ESI) (M+H)<sup>+</sup> Calcd for C<sub>10</sub>H<sub>9</sub>F<sub>3</sub>O<sub>2</sub>S<sub>2</sub>: 283.0074, found 283.0072.

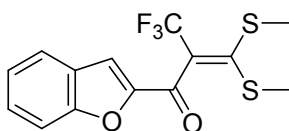

**1-(benzofuran-2-yl)-3,3-bis(methylthio)-2-(trifluoromethyl)prop-2-**

**en-1-one (3l)** : The compound was obtained as a yellow solid, yield : (475 mg, 93%) ; **IR** ( $\nu_{\max}$ cm<sup>-1</sup>) (CHCl<sub>3</sub>): 2925, 1656 ; **<sup>1</sup>H NMR** (400 MHz, CDCl<sub>3</sub>)  $\delta$ : 7.70 (d,  $J$  = 8.24 Hz, 1H), 7.57 (d,  $J$  = 8.24 Hz, 1H), 7.48 (t,  $J$  = 8.24 Hz, 2H) 7.30 (t,  $J$  = 7.79 Hz, 1H), 2.46 (s, 3H), 2.23 (s, 3H) ; **<sup>13</sup>C NMR** (100 MHz, CDCl<sub>3</sub>)  $\delta$ : 178.3, , 156.3, 153.5, 152.0, 128.9, 126.9, 124.1, 123.5, 122.4 (vinylic C-CF<sub>3</sub>), 119.5 (-CF<sub>3</sub>), 115.6, 112.5, 17.7 (-SCH<sub>3</sub>), 17.0 (-SCH<sub>3</sub>) ; **HRMS** (ESI) (M+H)<sup>+</sup> Calcd for C<sub>14</sub>H<sub>11</sub>F<sub>3</sub>O<sub>2</sub>S<sub>2</sub>: 333.0231, found 333.0230.

## General procedure for the synthesis of trifluoromethylated 1*H*-pyrazoles (4a-l)

In an oven-dried RBF, hydrazine hydrate (1.5equiv.) was added to a solution of compound **3** (1equiv.) in EtOH and reaction mass was heated at 90°C for 2-3hrs. Progress of reaction was monitored by TLC. The reaction mixture was then cooled and solvent was evaporated. After that crude was purified by column chromatography using 20% ethyl acetate/hexane as eluent to afford the corresponding products **4a-l**.

### 5.7.4.1 Analytical data of 3,4-dihydro-1*H*-quinazolin-2-ylidenes (4a-l)

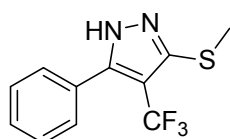

#### 3-(methylthio)-5-phenyl-4-(trifluoromethyl)-1*H*-pyrazole (4a) :

The compound was obtained as light yellow solid, yield : (247 mg, 80%) ;mp 122-124°C; **IR** ( $\nu_{\max}$ cm<sup>-1</sup>) (CHCl<sub>3</sub>): 3221, 2924 ; **<sup>1</sup>H NMR** (400 MHz, CDCl<sub>3</sub>)  $\delta$ : 7.45 (s, 5H), 2.54 (s, 3H, -SCH<sub>3</sub>); **<sup>13</sup>C NMR** (100 MHz, CDCl<sub>3</sub>)  $\delta$ : 146.3, 146.1, 129.8, 128.7, 128.4, 128.1, 124.2, 121.5(C-CF<sub>3</sub>), 114.0, 108.7 (q,  $J$  = 32.5Hz, -CF<sub>3</sub>), 15.4 (-SCH<sub>3</sub>) ; **<sup>19</sup>F NMR** (376 MHz, CDCl<sub>3</sub>)  $\delta$ : -54.22 (s, 3F); **HRMS** (ESI) (M+H)<sup>+</sup> Calcd for C<sub>11</sub>H<sub>9</sub>F<sub>3</sub>N<sub>2</sub>S: 259.0517, found 259.0515.

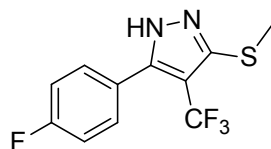

#### 5-(4-fluorophenyl)-3-(methylthio)-4-(trifluoromethyl)-1*H*-pyrazole (4b) :

The compound was obtained as light yellow solid, yield : (252 mg, 81%) ; mp 112-114°C; **IR** ( $\nu_{\max}$ cm<sup>-1</sup>) (CHCl<sub>3</sub>): 3218, 2926 ; **<sup>1</sup>H NMR** (400 MHz, CDCl<sub>3</sub>)  $\delta$ : 7.45 (dd,  $J$  = 8.70, 3.21 Hz, 2H), 7.12 (t,  $J$  = 8.70 Hz, 2H), 2.53 (s, 3H, -SCH<sub>3</sub>); **<sup>13</sup>C NMR** (100 MHz, CDCl<sub>3</sub>)  $\delta$ : 164.8, 162.3, 146.0, 145.4, 130.5, 124.4, 124.0, 121.3 (C-CF<sub>3</sub>), 116.0, 115.7, 109.0 (-CF<sub>3</sub>), 15.7 (-SCH<sub>3</sub>) ; **<sup>19</sup>F NMR** (376 MHz, CDCl<sub>3</sub>)  $\delta$ : -54.92 (s, 3F); **HRMS** (ESI) (M+H)<sup>+</sup> Calcd for C<sub>11</sub>H<sub>8</sub>F<sub>4</sub>N<sub>2</sub>S: 277.0422, found 277.0417.

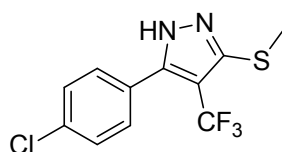

**5-(4-chlorophenyl)-3-(methylthio)-4-(trifluoromethyl)-1*H*-pyrazole (4c) :** The compound was obtained as light yellow solid, yield : (257 mg, 82%) ;

mp 120-122°C; **IR** ( $\nu_{\max}$ cm<sup>-1</sup>) (CHCl<sub>3</sub>): 3216, 2925 ; **<sup>1</sup>H NMR** (400 MHz, CDCl<sub>3</sub>)  $\delta$ : 8.20 (bs, 1H, NH), 7.36 (s, 4H), 2.50 (s, 3H, -SCH<sub>3</sub>); **<sup>13</sup>C NMR** (100 MHz, CDCl<sub>3</sub>)  $\delta$ : 146.1, 145.0, 136.0, 129.7, 128.9, 126.9, 124.0, 121.3(C-CF<sub>3</sub>), 118.7, 113.6, 109.1(-CF<sub>3</sub>), 15.9 (-SCH<sub>3</sub>) ; **<sup>19</sup>F NMR** (376 MHz, CDCl<sub>3</sub>)  $\delta$ : -53.91 (s, 3F); **HRMS** (ESI) (M+H)<sup>+</sup> Calcd for C<sub>11</sub>H<sub>8</sub>ClF<sub>3</sub>N<sub>2</sub>S: 293.0127, found 293.0126.

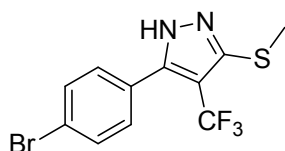

**5-(4-bromophenyl)-3-(methylthio)-4-(trifluoromethyl)-1H-pyrazole (4d)** : The compound was obtained as light yellow viscous material, yield : (254 mg, 80%) ; **IR** ( $\nu_{\max}$ cm<sup>-1</sup>) (CHCl<sub>3</sub>): 3219, 2925 ; **<sup>1</sup>H NMR** (400 MHz, CDCl<sub>3</sub>)  $\delta$ : 8.41 (bs, 1H, NH), 7.53 (d, J = 7.79 Hz, 2H), 7.30 (d, J = 8.24 Hz, 2H), 2.50 (s, 3H, -SCH<sub>3</sub>); **<sup>13</sup>C NMR** (100 MHz, CDCl<sub>3</sub>)  $\delta$ : 131.9, 130.0, 128.9, 127.4, 125.5, 124.3, 15.9 (-SCH<sub>3</sub>) ; **<sup>19</sup>F NMR** (376 MHz, CDCl<sub>3</sub>)  $\delta$ : -53.22 (s, 3F); **HRMS** (ESI) (M+H)<sup>+</sup> Calcd for C<sub>11</sub>H<sub>8</sub>BrF<sub>3</sub>N<sub>2</sub>S: 336.9622, found 336.9620.

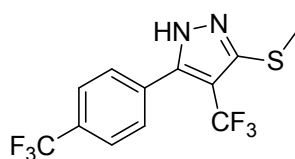

**3-(methylthio)-4-(trifluoromethyl)-5-(4-(trifluoromethyl)phenyl)-1H-pyrazole (4e)** : The compound was obtained as light yellow solid, yield : (253 mg, 80%) ; mp 76-78°C; **IR** ( $\nu_{\max}$ cm<sup>-1</sup>) (CHCl<sub>3</sub>): 3226, 2926 ; **<sup>1</sup>H NMR** (400 MHz, CDCl<sub>3</sub>)  $\delta$ : 8.19 (bs, 1H, NH), 7.67 (d, J = 8.24 Hz, 2H), 7.59 (d, J = 7.33 Hz, 2H), 2.54 (s, 3H); **<sup>13</sup>C NMR** (100 MHz, CDCl<sub>3</sub>)  $\delta$ : 146.5, 144.4, 132.4, 131.8, 131.4, 128.9, 125.6, 124.1, 122.3, 121.3 (C-CF<sub>3</sub>), 109.2 (-CF<sub>3</sub>), 16.2 (-SCH<sub>3</sub>) ; **<sup>19</sup>F NMR** (376 MHz, CDCl<sub>3</sub>)  $\delta$ : -53.93 (s, 3F), -62.82 (s, 3F, Ar-CF<sub>3</sub>); **HRMS** (ESI) (M+H)<sup>+</sup> Calcd for C<sub>12</sub>H<sub>8</sub>F<sub>6</sub>N<sub>2</sub>S: 327.0390, found 327.0385.

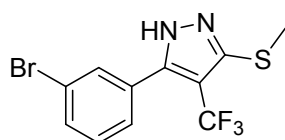

**5-(3-bromophenyl)-3-(methylthio)-4-(trifluoromethyl)-1H-pyrazole (4f)** : The compound was obtained as light yellow viscous material, yield : (257 mg, 81%) ; mp 104-106°C; **IR** ( $\nu_{\max}$ cm<sup>-1</sup>) (CHCl<sub>3</sub>): 3219, 2925; **<sup>1</sup>H NMR** (400 MHz, CDCl<sub>3</sub>)  $\delta$ : 8.84 (bs, 1H, NH), 7.58-7.52 (m, 2H), 7.37 (d, J = 7.33 Hz, 1H), 7.25 (d, J = 8.24 Hz, 1H), 2.49 (s,



3H, -SCH<sub>3</sub>); <sup>13</sup>C NMR (100 MHz, CDCl<sub>3</sub>) δ: 145.8, 144.7, 132.7, 131.3, 130.7, 130.1, 127.2, 124.0, 122.5, 121.3(C-CF<sub>3</sub>), 18.7, 109.6 (-CF<sub>3</sub>), 16.0 (-SCH<sub>3</sub>); <sup>19</sup>F NMR (376 MHz, CDCl<sub>3</sub>) δ: -53.25 (s, 3F); **HRMS** (ESI) (M+H)<sup>+</sup> Calcd for C<sub>11</sub>H<sub>8</sub>BrF<sub>3</sub>N<sub>2</sub>S: 336.9622, found 336.9621.

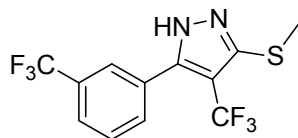

**3-(methylthio)-4-(trifluoromethyl)-5-(3-(trifluoromethyl)phenyl)-1H-pyrazole (4g)** : The compound was obtained as light yellow solid, yield : (263 mg, 83%) ; mp 92-94°C; **IR** (ν<sub>max</sub>cm<sup>-1</sup>) (CHCl<sub>3</sub>): 3219, 2925 ; **<sup>1</sup>H NMR** (400 MHz, CDCl<sub>3</sub>) δ: 7.74 (s, 1H), 7.67 (t, *J* = 8.39 Hz, 2H), 7.54 (d, *J* = 8.39 Hz, 1H), 2.52 (s, 3H, -SCH<sub>3</sub>); <sup>13</sup>C NMR (100 MHz, CDCl<sub>3</sub>) δ: 146.4, 144.2, 131.9, 131.3, 130.0, 129.9, 129.2, 126.3, 125.3, 122.2, 121.3(C-CF<sub>3</sub>), 114.0, 109.7(-CF<sub>3</sub>), 16.1 (-SCH<sub>3</sub>); <sup>19</sup>F NMR (376 MHz, CDCl<sub>3</sub>) δ: -53.81 (s, 3F), 62.84 (s, 3F, Ar-CF<sub>3</sub>); **HRMS** (ESI) (M+H)<sup>+</sup> Calcd for C<sub>12</sub>H<sub>8</sub>F<sub>6</sub>N<sub>2</sub>S: 327.0390, found 327.0382.

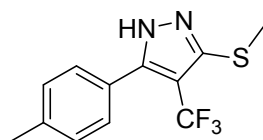

**3-(methylthio)-5-(p-tolyl)-4-(trifluoromethyl)-1H-pyrazole (4h)** : The compound was obtained as light yellow solid, yield : (223 mg, 72%) ; mp 128-130°C; **IR** (ν<sub>max</sub>cm<sup>-1</sup>) (CHCl<sub>3</sub>): 3233, 2927 ; **<sup>1</sup>H NMR** (400 MHz, CDCl<sub>3</sub>) δ: 7.87 (bs, 1H, NH), 7.32(d, *J* = 8.24 Hz, 2H), 7.21 (d, *J* = 8.24 Hz, 2H), 2.51 (s, 3H,-SCH<sub>3</sub>), 2.37 (s, 3H, Ar-CH<sub>3</sub>); <sup>13</sup>C NMR (100 MHz, CDCl<sub>3</sub>) δ: 146.4, 146.2, 140.1, 129.4, 128.3, 125.0, 124.2, 121.5(C-CF<sub>3</sub>), 108.1(-CF<sub>3</sub>), 21.3 (Ar-CH<sub>3</sub>), 15.2 (-SCH<sub>3</sub>) ; <sup>19</sup>F NMR (376 MHz, CDCl<sub>3</sub>) δ: -53.95 (s, 3F); **HRMS** (ESI) (M+H)<sup>+</sup> Calcd for C<sub>12</sub>H<sub>11</sub>F<sub>3</sub>N<sub>2</sub>S: 273.0673, found 273.0664.

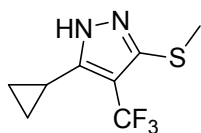

**5-cyclopropyl-3-(methylthio)-4-(trifluoromethyl)-1H-pyrazole (4i)** : The compound was obtained as a off white crystalline solid, yield : (230 mg, 76%) ; mp 116-118°C; **IR** (ν<sub>max</sub>cm<sup>-1</sup>) (CHCl<sub>3</sub>): 3174, 2920 ; **<sup>1</sup>H NMR** (400 MHz, CDCl<sub>3</sub>) δ: 9.30 (bs, 1H, NH), 2.46 (s, 3H,-SCH<sub>3</sub>), 2.01-1.93 (m, 1H,cyclopropyl CH), 1.02-0.97 (q, 2H, cyclopropyl CH<sub>2</sub>), 0.81-0.76 (q, 2H, cyclopropyl CH<sub>2</sub>) ; <sup>13</sup>C NMR (100 MHz, CDCl<sub>3</sub>) δ: 148.5, 144.7,

121.8 (C-CF<sub>3</sub>), 110.2 (q, *J* = 37.3 Hz, -CF<sub>3</sub>), 15.9 (-SCH<sub>3</sub>), 6.9 (cyclopropyl CH), 6.2 (cyclopropyl CH<sub>2</sub>); <sup>19</sup>F NMR (376 MHz, CDCl<sub>3</sub>) δ: -54.95 (s, 3F); HRMS (ESI) (M+H)<sup>+</sup> Calcd for C<sub>8</sub>H<sub>9</sub>F<sub>3</sub>N<sub>2</sub>S: 223.0517, found 223.0521.

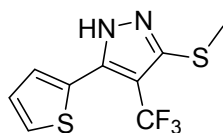

**3-(methylthio)-5-(thiophen-2-yl)-4-(trifluoromethyl)-1H-pyrazole (4j)**

: The compound was obtained as a viscous brown material, yield : (244 mg, 79%) ; IR (ν<sub>max</sub>cm<sup>-1</sup>) (CHCl<sub>3</sub>): 3459, 2923 ; <sup>1</sup>H NMR (400 MHz, CDCl<sub>3</sub>) δ: 9.38 (bs, 1H, NH), 7.28 (d, *J* = 5.04 Hz, 1H), 7.24 (d, *J* = 3.66 Hz, 1H), 6.98 (t, *J* = 4.58 Hz, 1H), 2.39 (s, 3H); <sup>13</sup>C NMR (100 MHz, CDCl<sub>3</sub>) δ: 144.1, 141.7, 129.2, 128.5, 127.8, 127.4, 124.1, 121.4(C-CF<sub>3</sub>), 108.4 (-CF<sub>3</sub>), 15.9(-SCH<sub>3</sub>) ; <sup>19</sup>F NMR (376 MHz, CDCl<sub>3</sub>) δ: -54.40 (s, 3F); HRMS (ESI) (M+H)<sup>+</sup> Calcd for C<sub>9</sub>H<sub>7</sub>F<sub>3</sub>N<sub>2</sub>S<sub>2</sub>: 265.0081, found 265.0082.

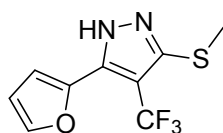

**5-(furan-2-yl)-3-(methylthio)-4-(trifluoromethyl)-1H-pyrazole (4k) :**

The compound was obtained as a off white crystalline solid, yield : (240 mg, 78%) ; mp 146-148°C; IR (ν<sub>max</sub>cm<sup>-1</sup>) (CHCl<sub>3</sub>): 3440, 2926 ; <sup>1</sup>H NMR (400 MHz, CDCl<sub>3</sub>) δ: 9.05 (bs, 1H, NH), 7.45 (d, *J* = 1.83 Hz, 1H), 6.83 (d, *J* = 3.21 Hz, 1H), 6.50 (dd, *J* = 3.66, 1.83 Hz, 1H), 2.55 (s, 3H, -SCH<sub>3</sub>) ; <sup>13</sup>C NMR (100 MHz, CDCl<sub>3</sub>) δ: 146.5, 143.3, 141.8, 136.3, 124.1, 121.5 (C-CF<sub>3</sub>), 112.1, 111.4, 105.8 (q, *J* = 38.3 Hz, -CF<sub>3</sub>), 15.0 (-SCH<sub>3</sub>) ; <sup>19</sup>F NMR (376 MHz, CDCl<sub>3</sub>) δ: -54.60 (s, 3F); HRMS (ESI) (M+H)<sup>+</sup> Calcd for C<sub>9</sub>H<sub>7</sub>F<sub>3</sub>N<sub>2</sub>OS: 249.0309, found 249.0306.

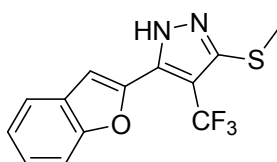

**5-(benzofuran-2-yl)-3-(methylthio)-4-(trifluoromethyl)-1H-pyrazole (4l) :**

The compound was obtained as a off white crystalline solid, yield : (241 mg, 77%) ; mp 178-180°C; IR (ν<sub>max</sub>cm<sup>-1</sup>) (CHCl<sub>3</sub>): 3420, 2924 ; <sup>1</sup>H NMR (400 MHz, DMSO-d<sub>6</sub>) δ: 7.67 (d, *J* = 7.79 Hz, 1H), 7.56 (d, *J* = 8.24 Hz, 1H), 7.31 (t, *J* = 8.24 Hz, 1H) 7.24-7.21 (m, 2H), 2.49 (s, 3H, -SCH<sub>3</sub>) ; <sup>13</sup>C NMR (100 MHz, DMSO-d<sub>6</sub>) δ: 154.2, 127.6,

125.8, 124.4, 123.6, 121.9 (C-CF<sub>3</sub>), 111.3, 106.7(-CF<sub>3</sub>), 14.7 (-SCH<sub>3</sub>) ; **<sup>19</sup>F NMR** (376 MHz, CDCl<sub>3</sub>) δ: -55.20 (s, 3F); **HRMS** (ESI) (M+H)<sup>+</sup> Calcd for C<sub>13</sub>H<sub>9</sub>F<sub>3</sub>N<sub>2</sub>OS: 299.0466, found 299.0466.

***COPIES OF  $^1\text{H}$ ,  $^{13}\text{C}$ NMR & HRMS  
DATA***

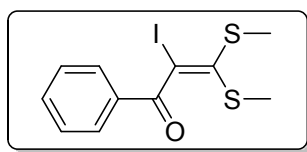

2a

$^1\text{H-NMR}$  in  $\text{CDCl}_3$  (400MHz)

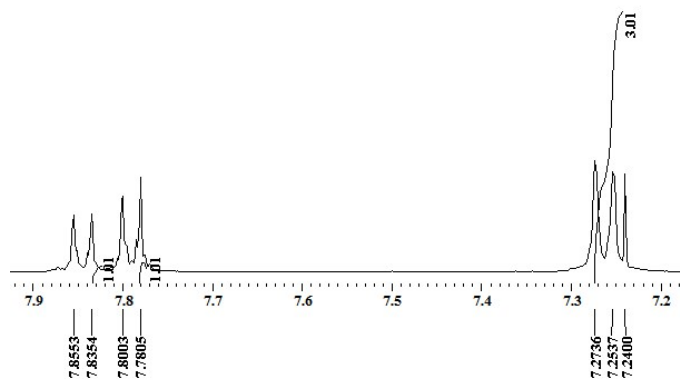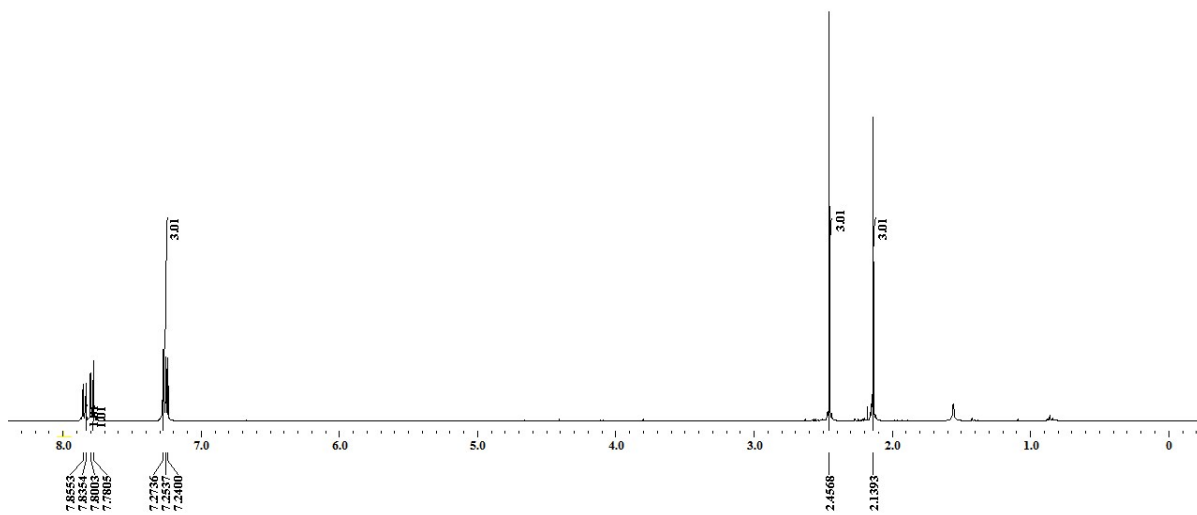

$^{13}\text{C-NMR}$  in  $\text{CDCl}_3$  (100MHz)

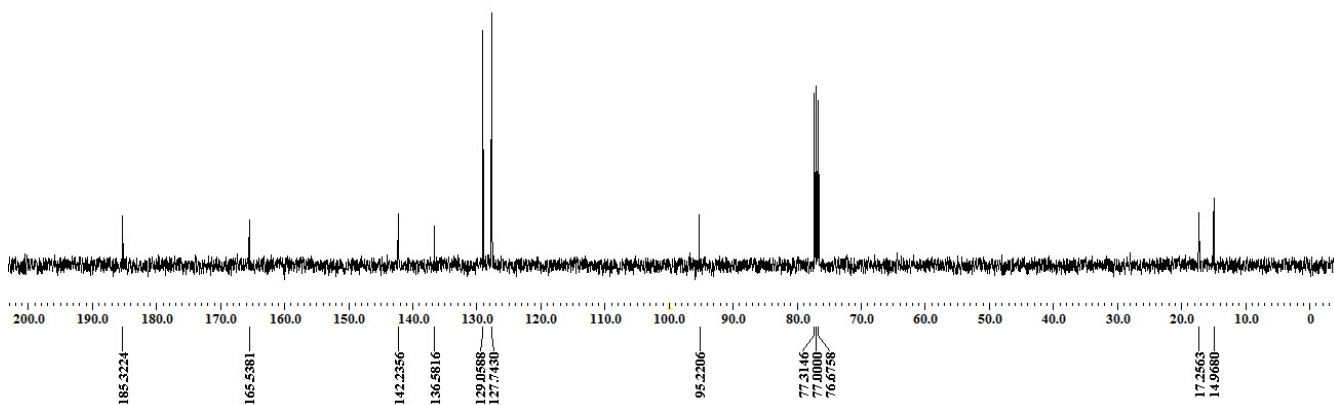

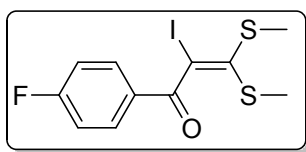

2b

$^1\text{H-NMR}$  in  $\text{CDCl}_3$  (400MHz)

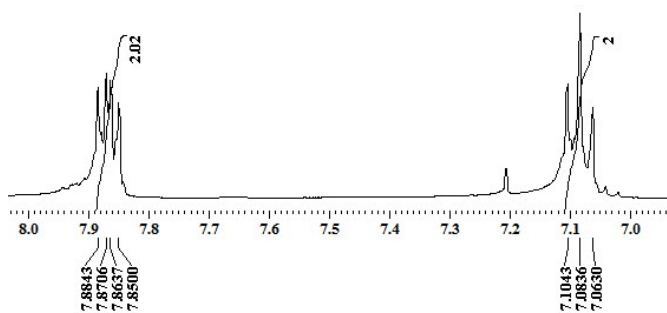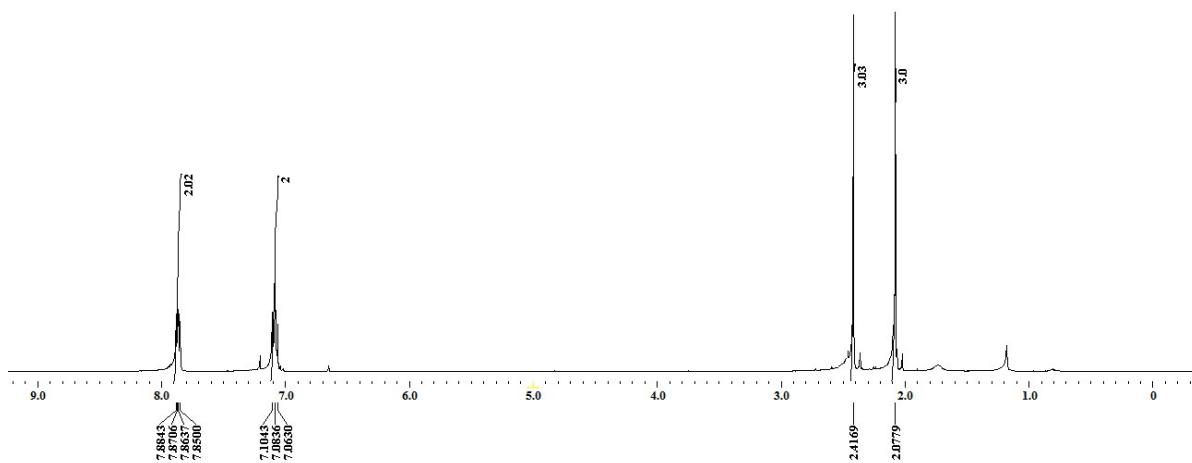

$^{13}\text{C-NMR}$  in  $\text{CDCl}_3$  (100MHz)

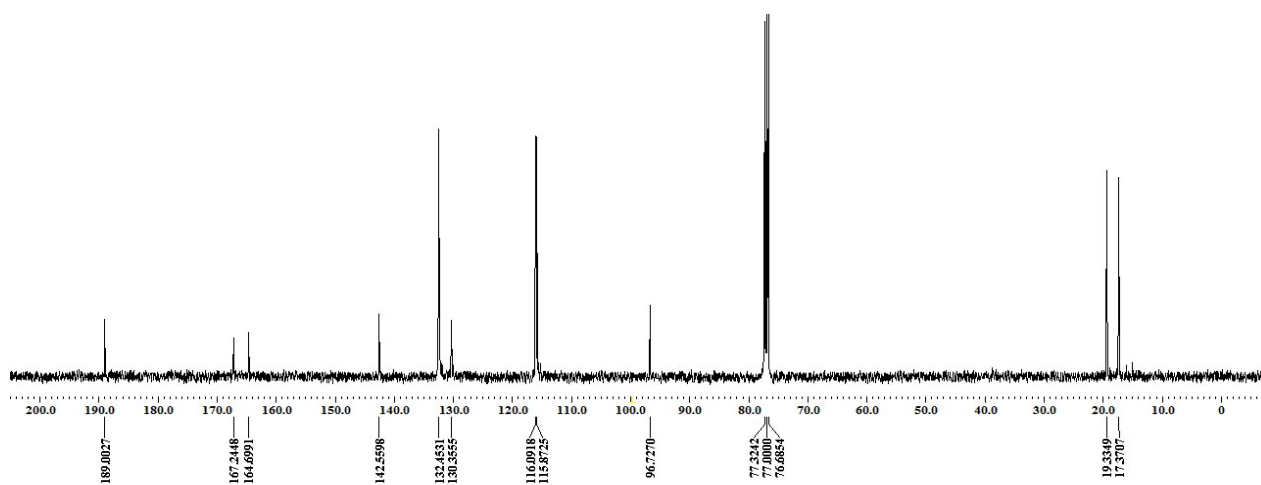

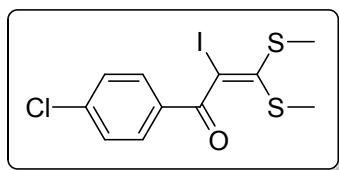

2c

$^1\text{H-NMR}$  in  $\text{CDCl}_3$  (400MHz)

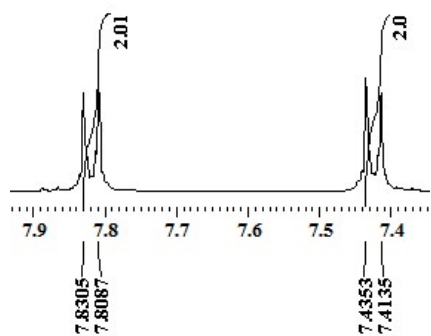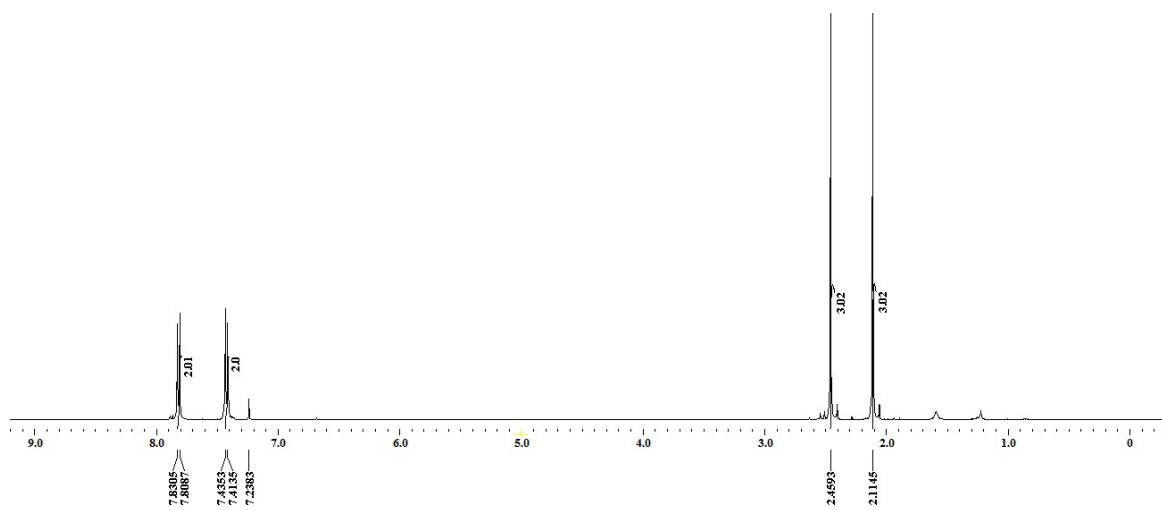

$^{13}\text{C-NMR}$  in  $\text{CDCl}_3$  (100MHz)

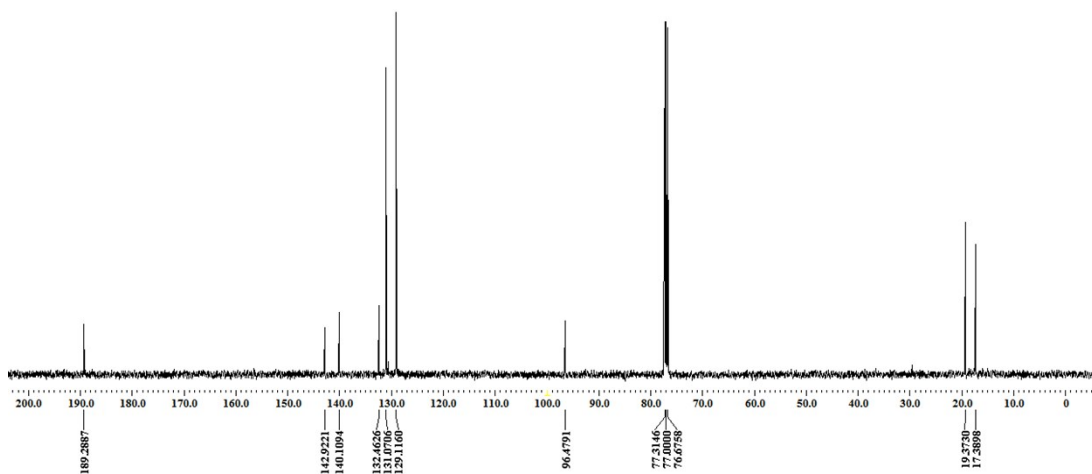

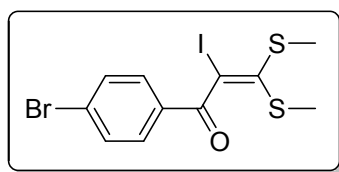

2d

$^1\text{H-NMR}$  in  $\text{CDCl}_3$  (400MHz)

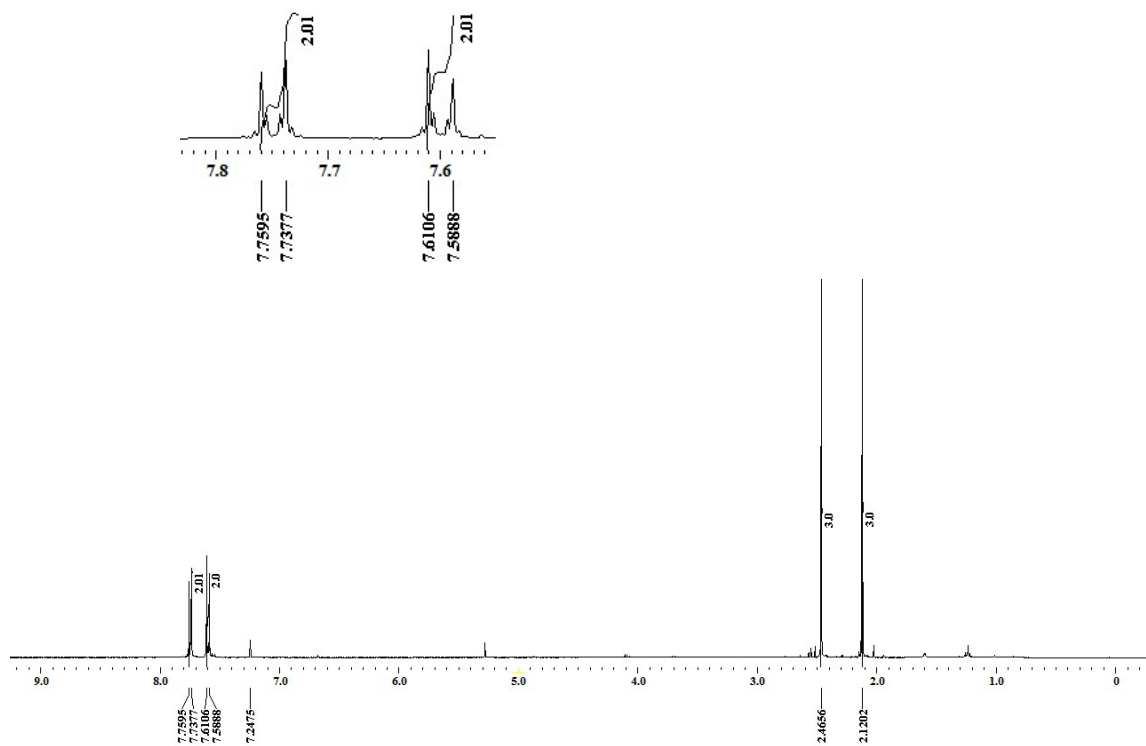

$^{13}\text{C-NMR}$  in  $\text{CDCl}_3$  (100MHz)

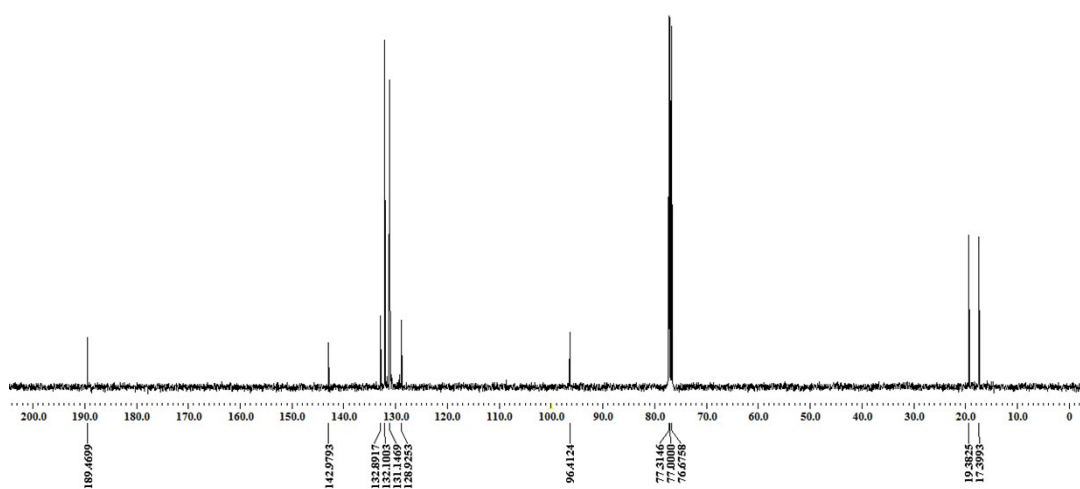



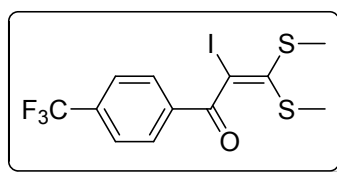

2e

$^1\text{H-NMR}$  in  $\text{CDCl}_3$  (400MHz)

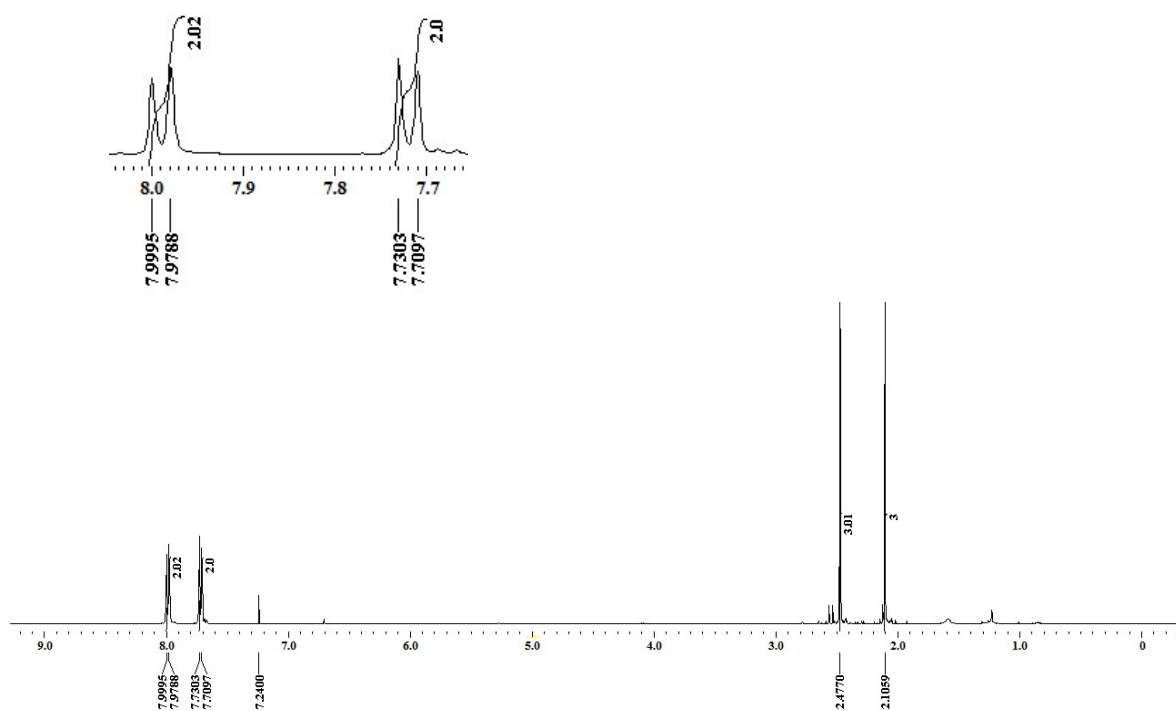

$^{13}\text{C-NMR}$  in  $\text{CDCl}_3$  (100MHz)

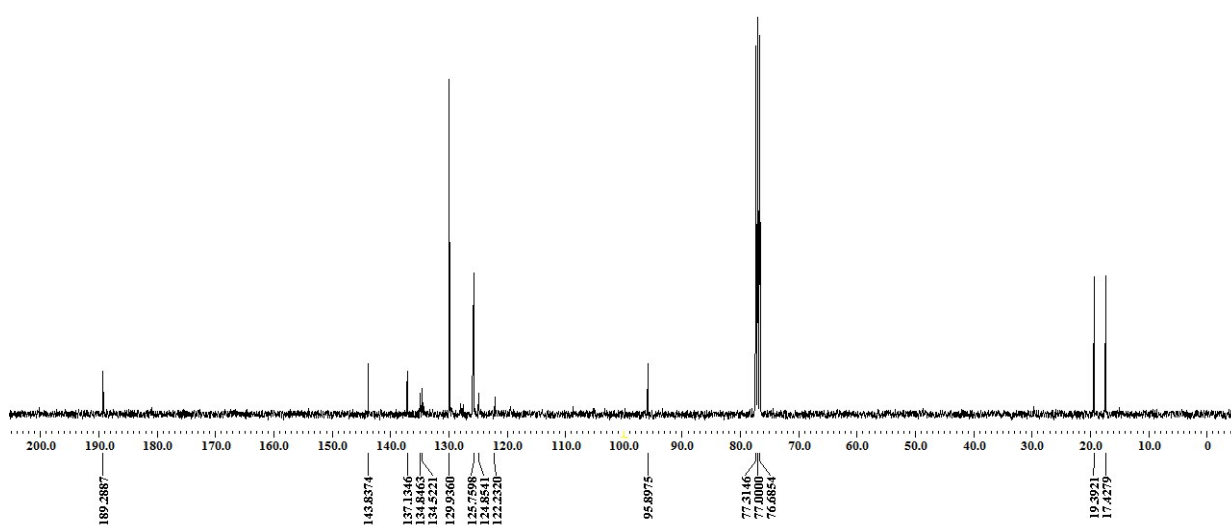

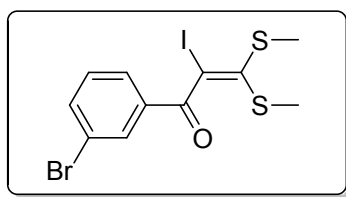

2f

$^1\text{H-NMR}$  in  $\text{CDCl}_3$  (400MHz)

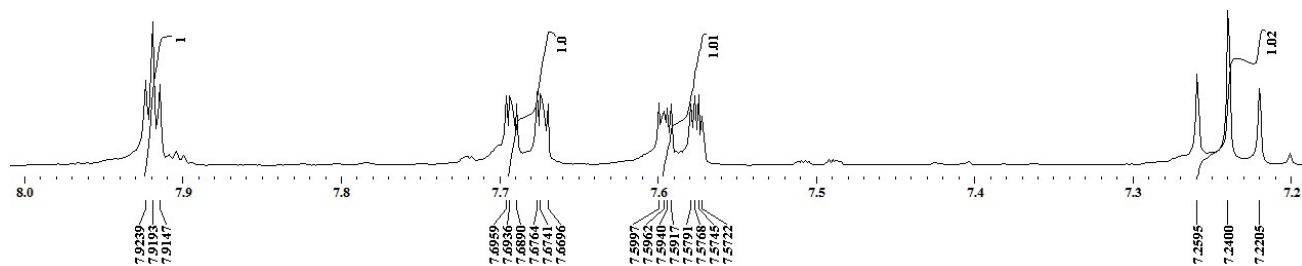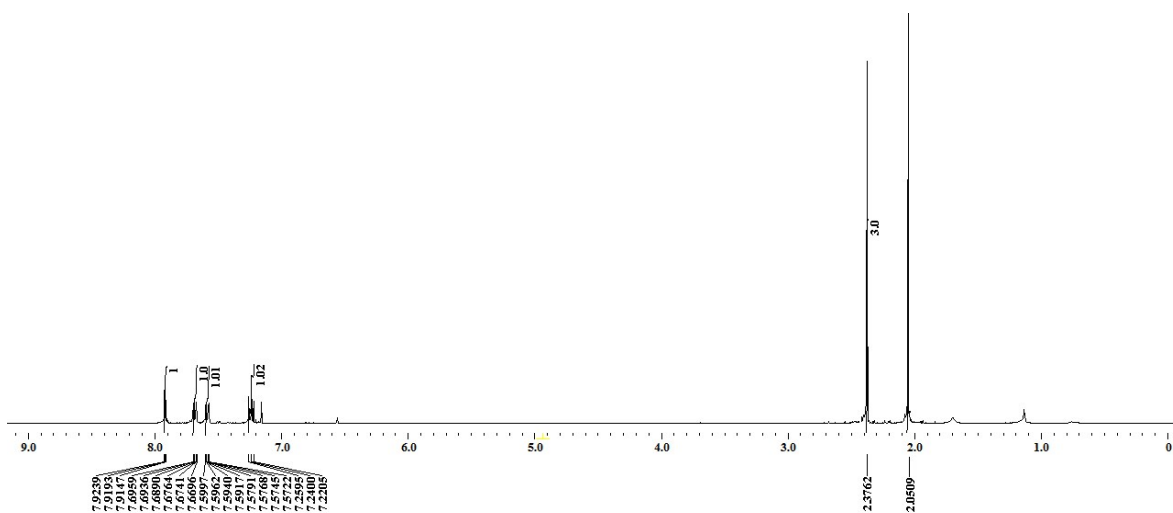

$^{13}\text{C-NMR}$  in  $\text{CDCl}_3$  (100MHz)

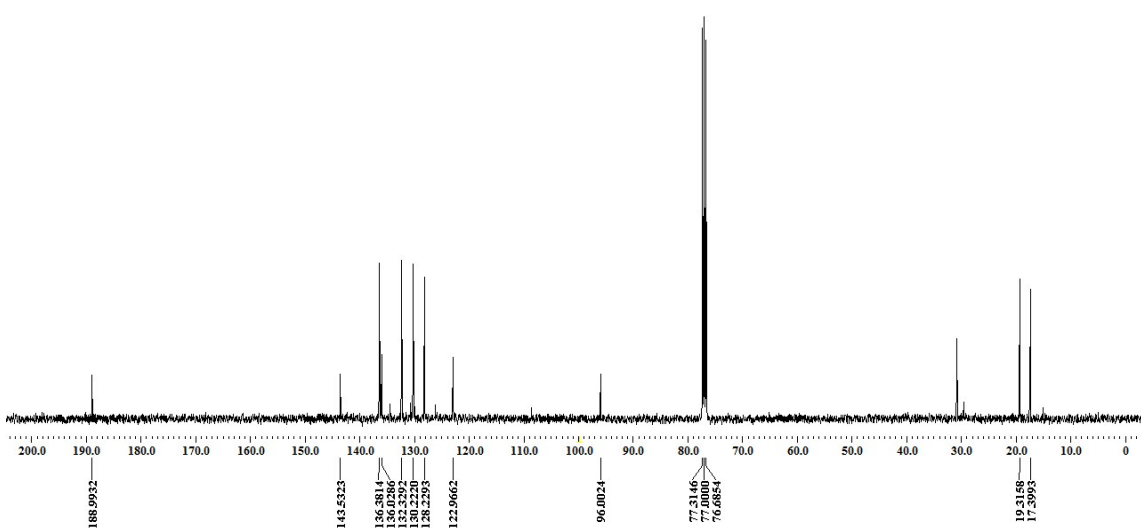

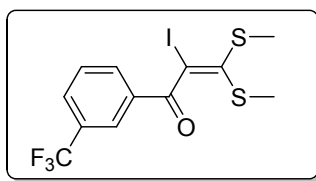

2g

<sup>1</sup>H-NMR in CDCl<sub>3</sub> (400MHz)

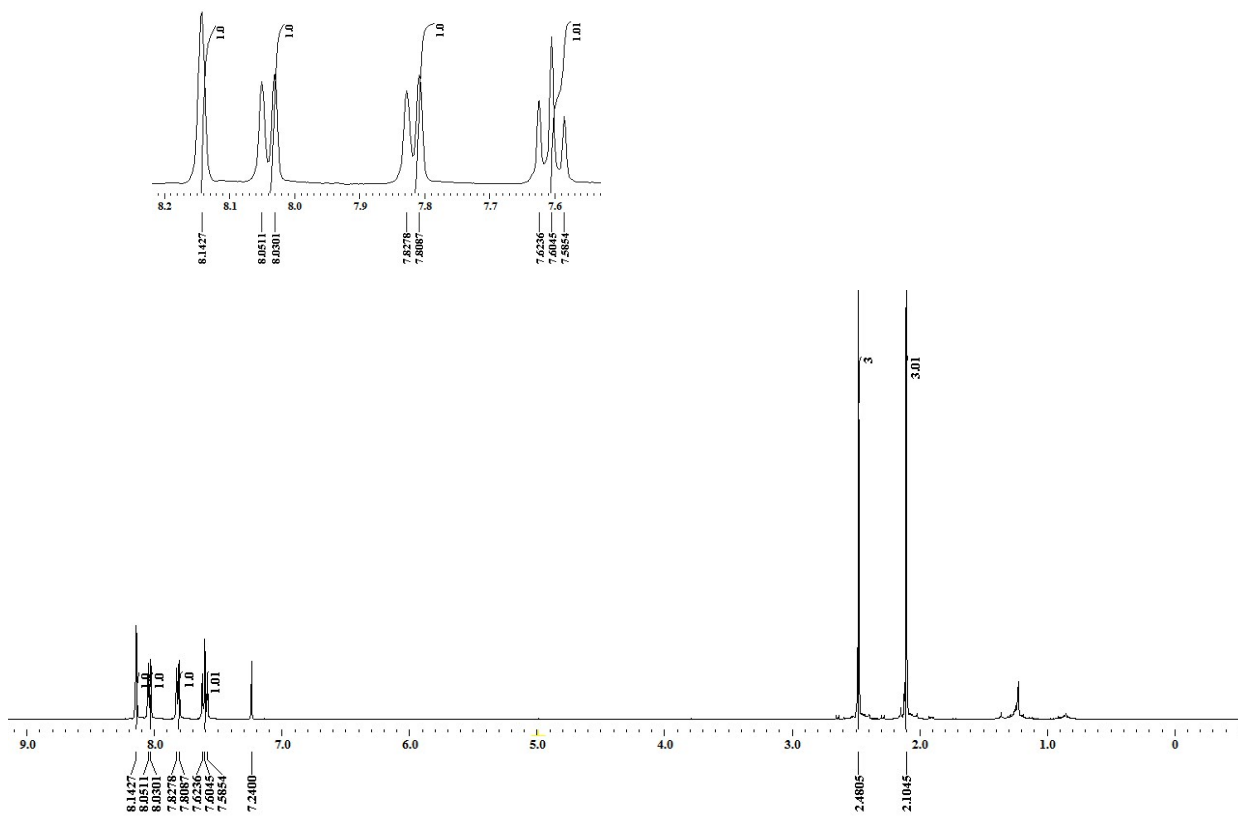

<sup>13</sup>C-NMR in CDCl<sub>3</sub> (100MHz)

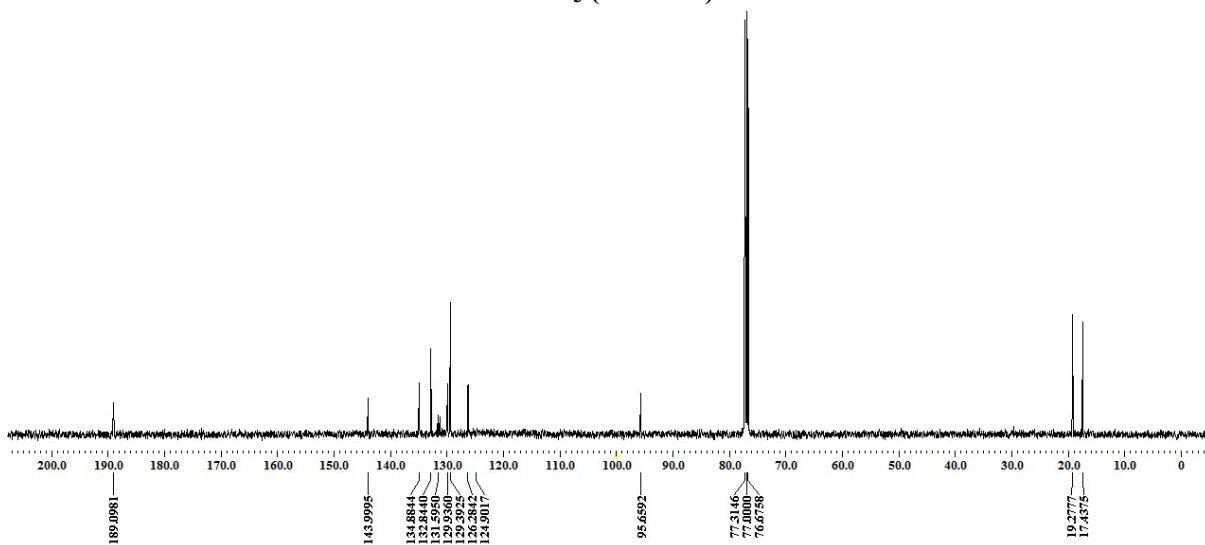

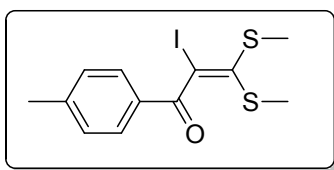

2h

$^1\text{H-NMR}$  in  $\text{CDCl}_3$  (400MHz)

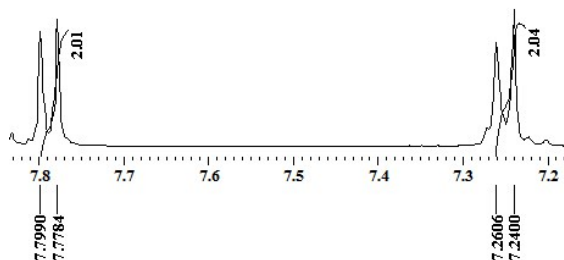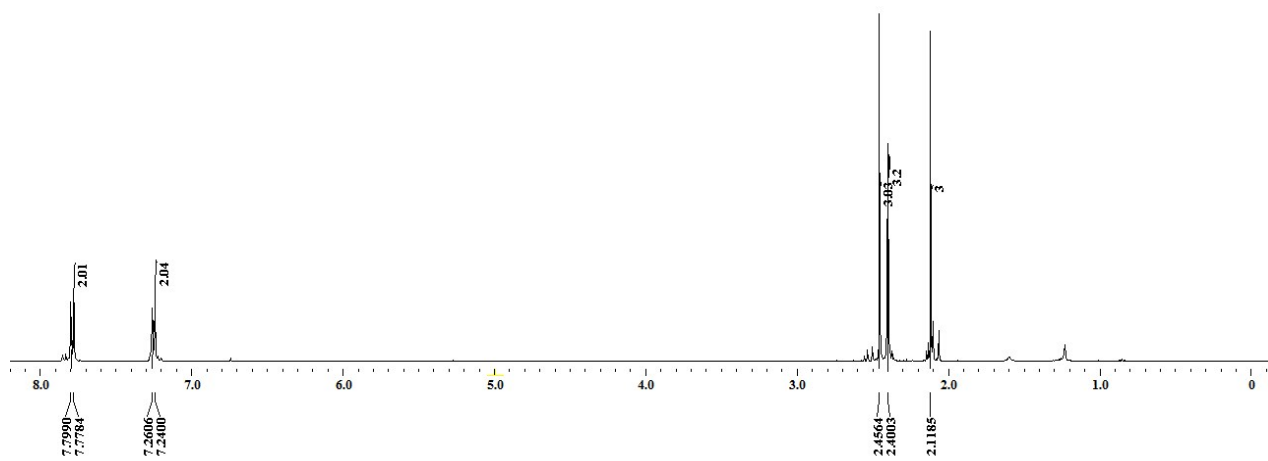

$^{13}\text{C-NMR}$  in  $\text{CDCl}_3$  (100MHz)

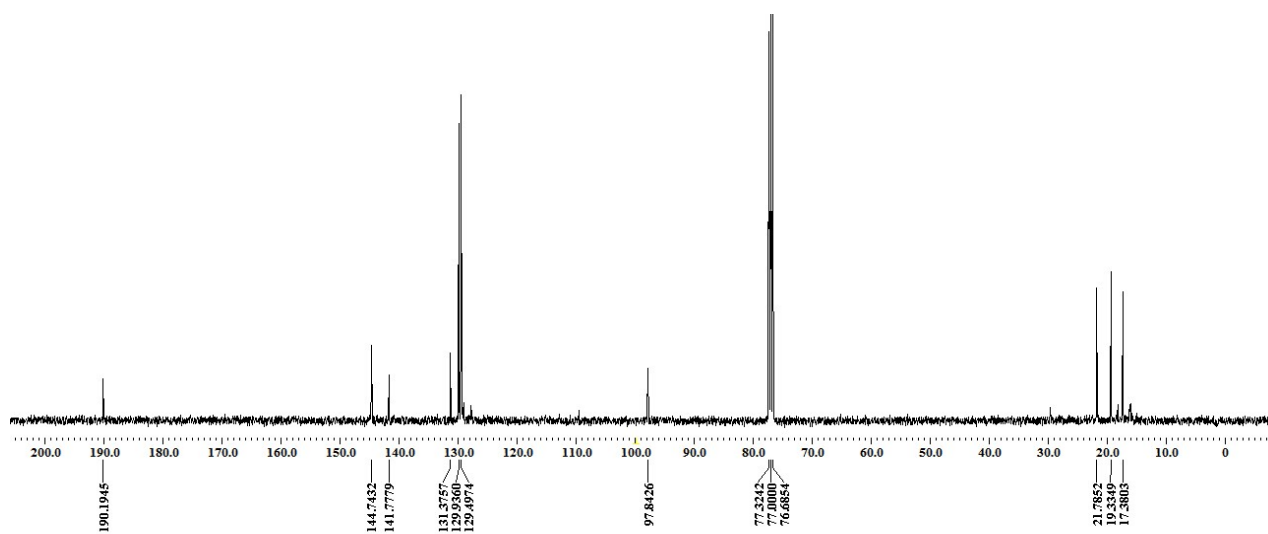

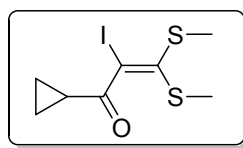

2i

$^1\text{H-NMR}$  in  $\text{CDCl}_3$  (400MHz)

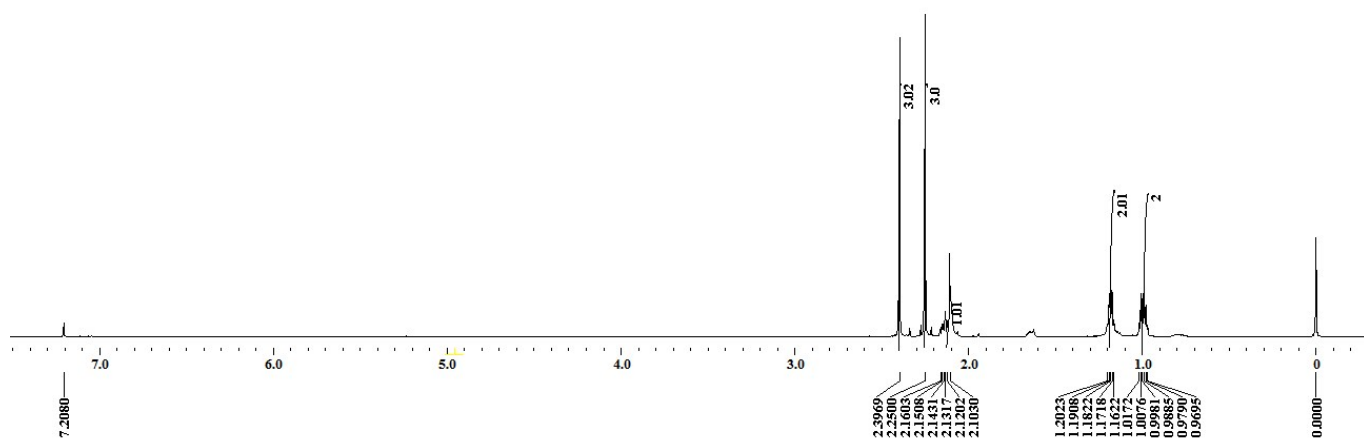

$^{13}\text{C-NMR}$  in  $\text{CDCl}_3$  (100MHz)

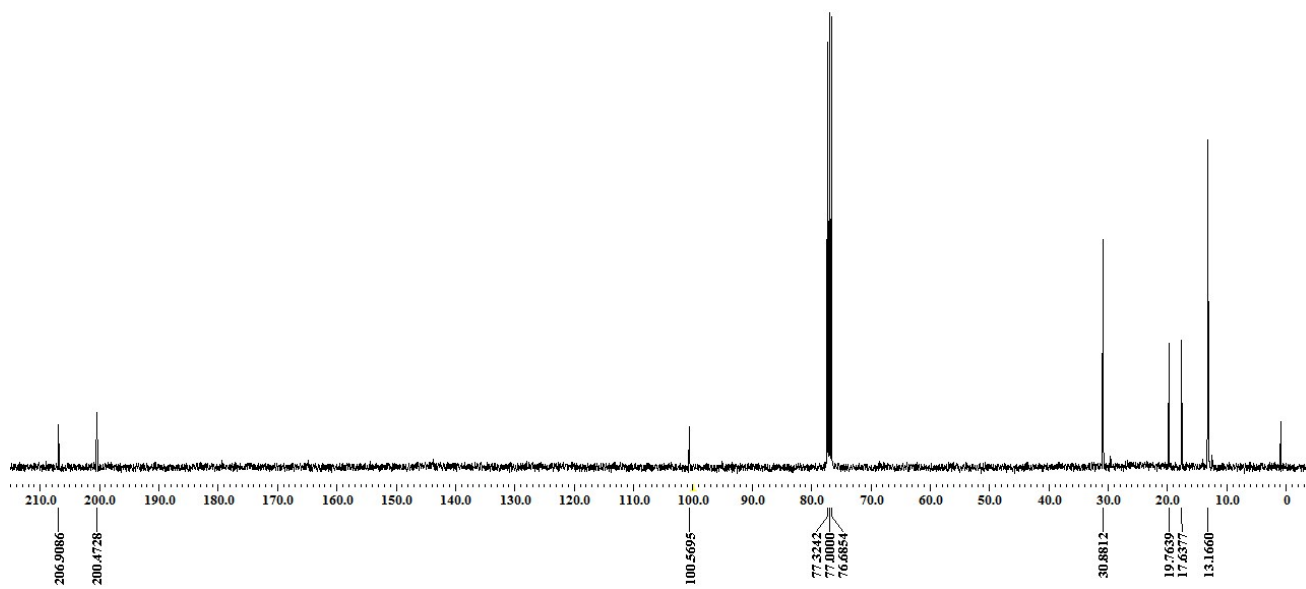

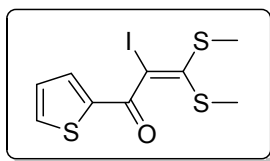

2j

<sup>1</sup>H-NMR in CDCl<sub>3</sub> (400MHz)

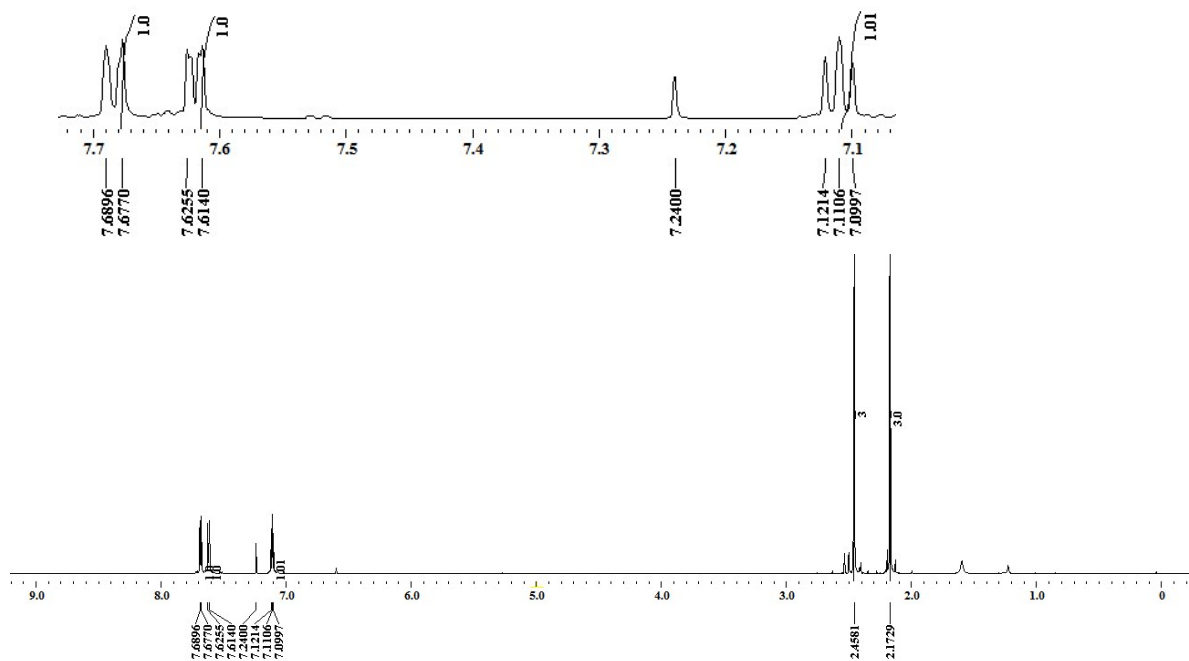

<sup>13</sup>C-NMR in CDCl<sub>3</sub> (100MHz)

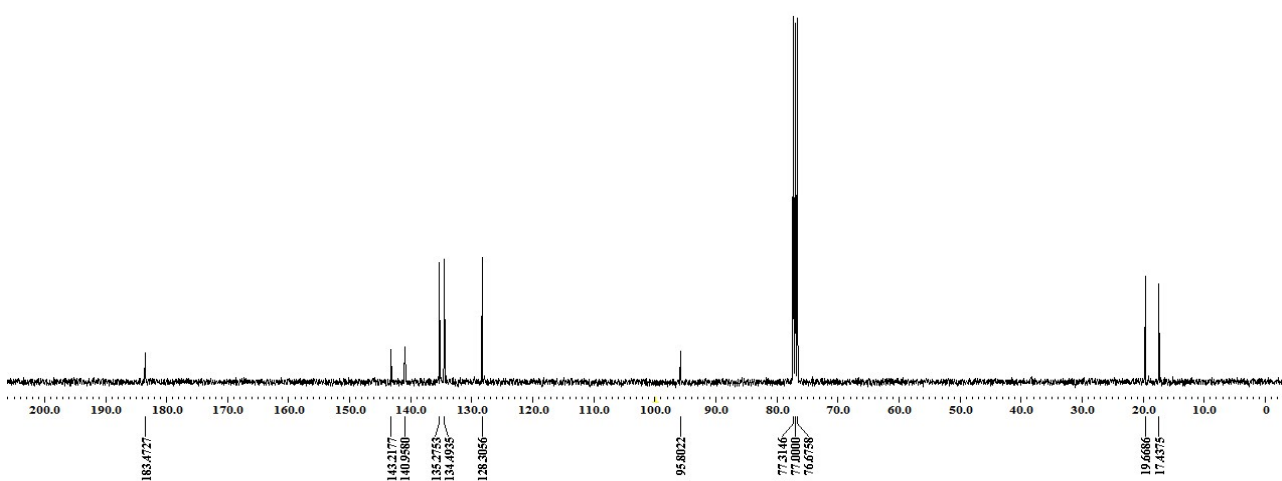

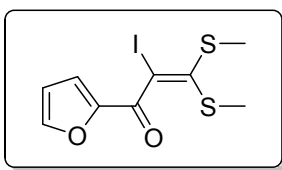

2k

$^1\text{H-NMR}$  in  $\text{CDCl}_3$  (400MHz)

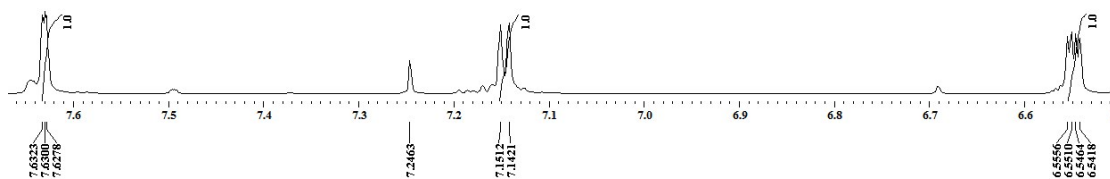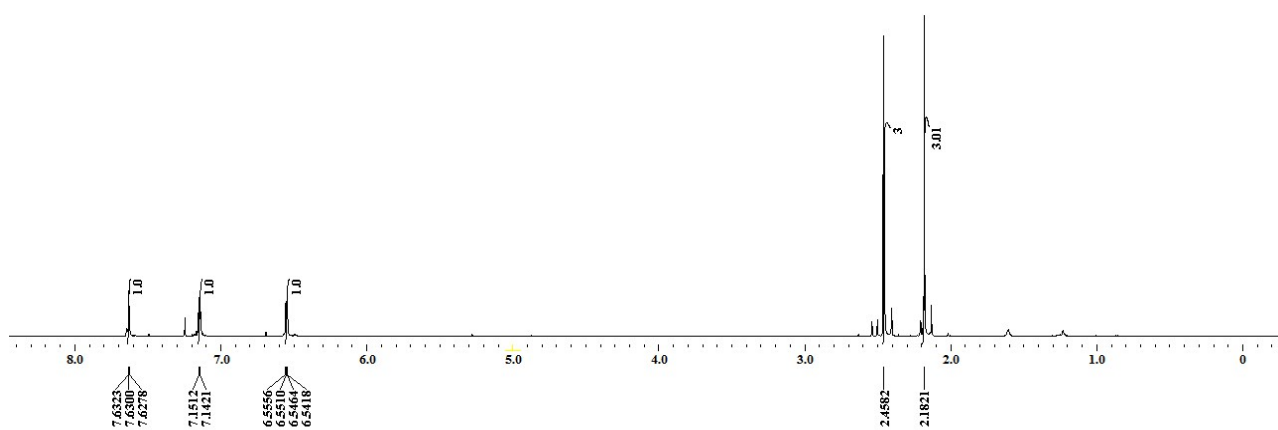

$^{13}\text{C-NMR}$  in  $\text{CDCl}_3$  (100MHz)

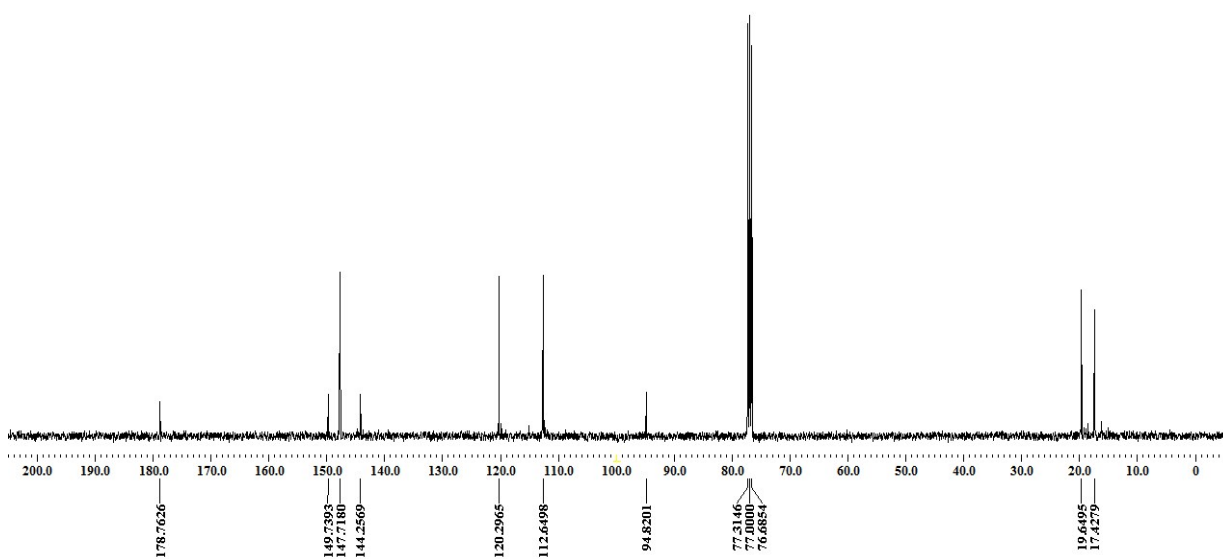

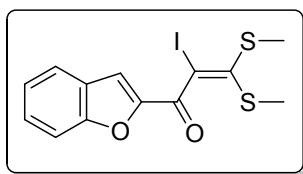

21

$^1\text{H-NMR}$  in  $\text{CDCl}_3$  (400MHz)

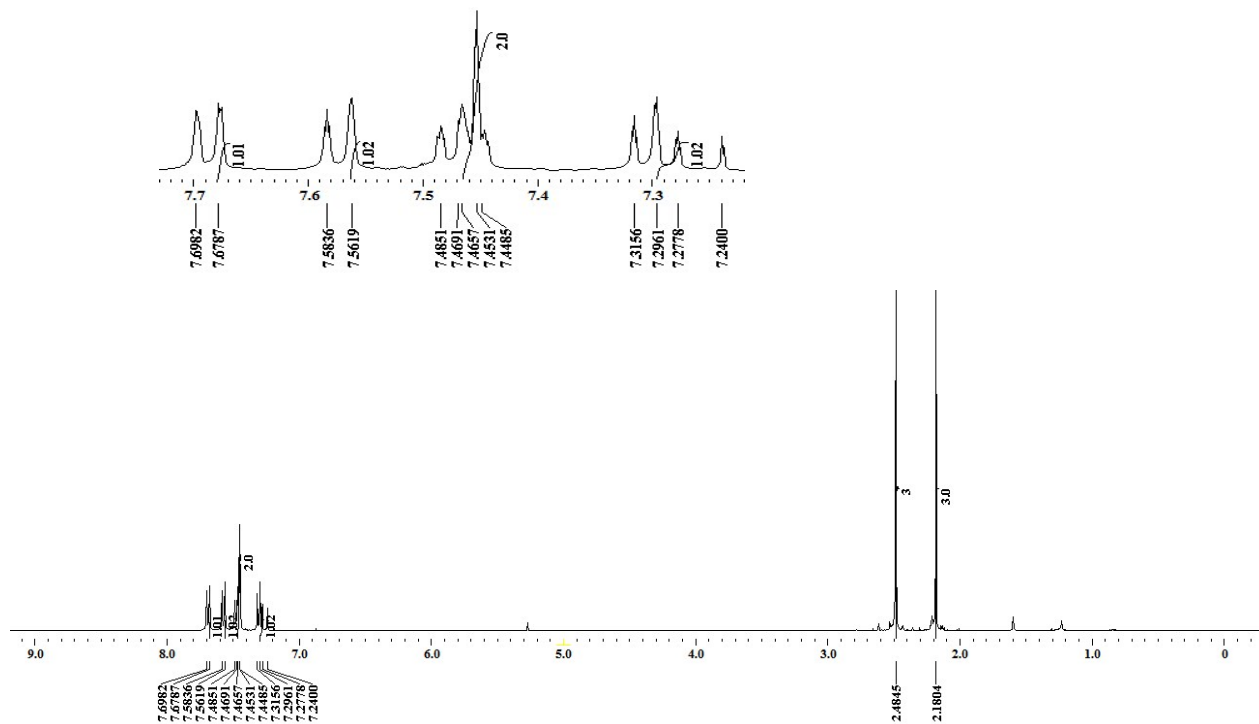

$^{13}\text{C-NMR}$  in  $\text{CDCl}_3$  (100MHz)

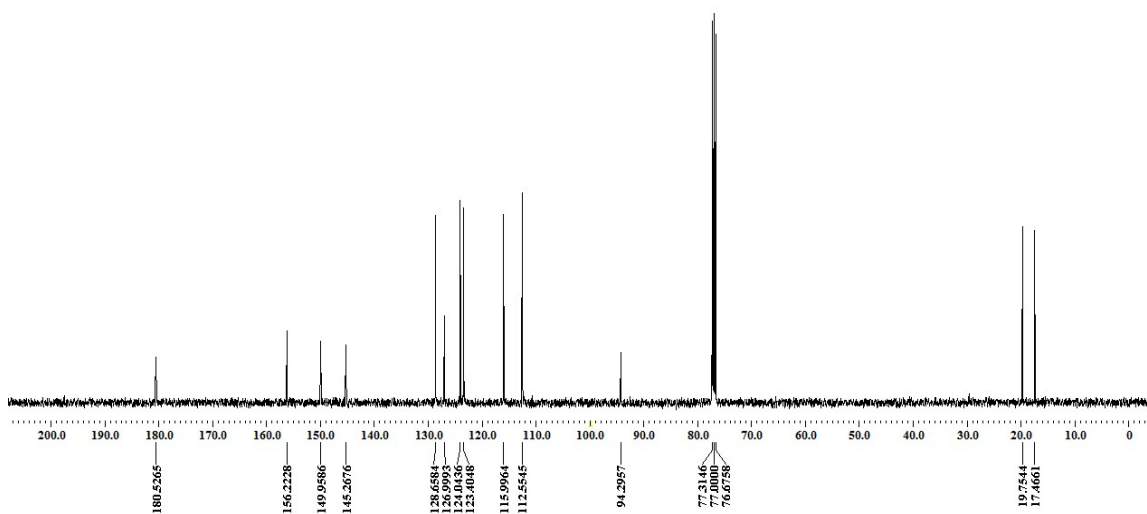



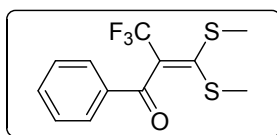

**3a**

**<sup>1</sup>H-NMR in CDCl<sub>3</sub> (400MHz)**

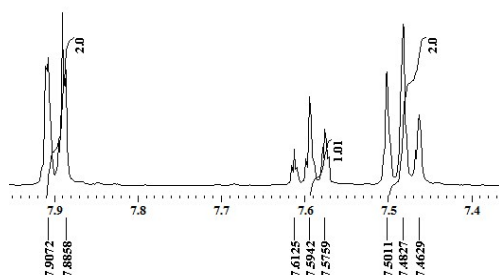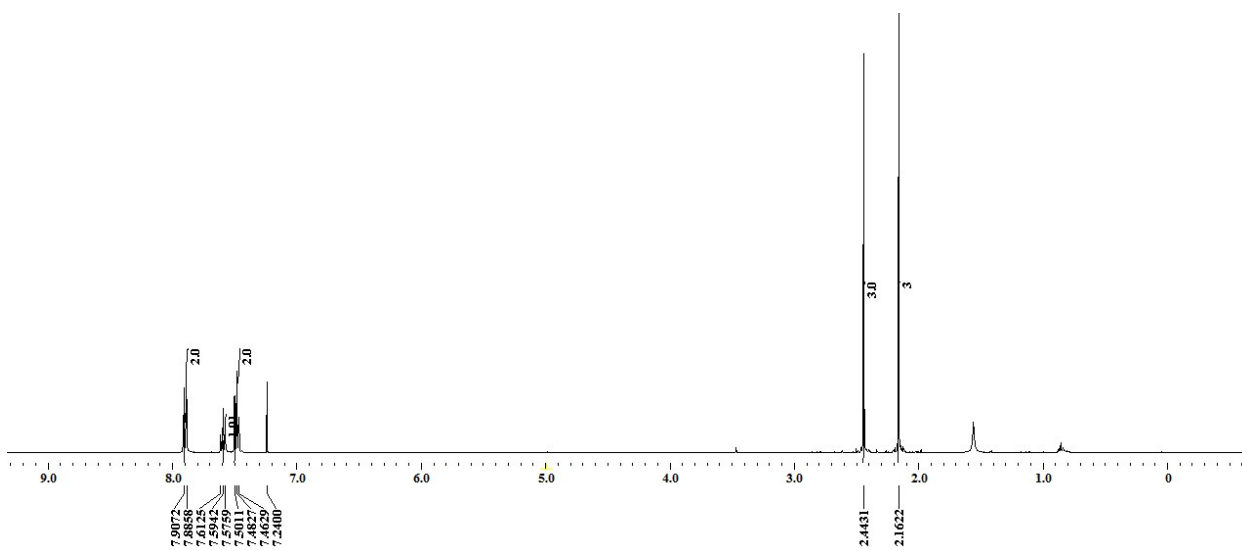

**<sup>13</sup>C-NMR in CDCl<sub>3</sub> (400MHz)**

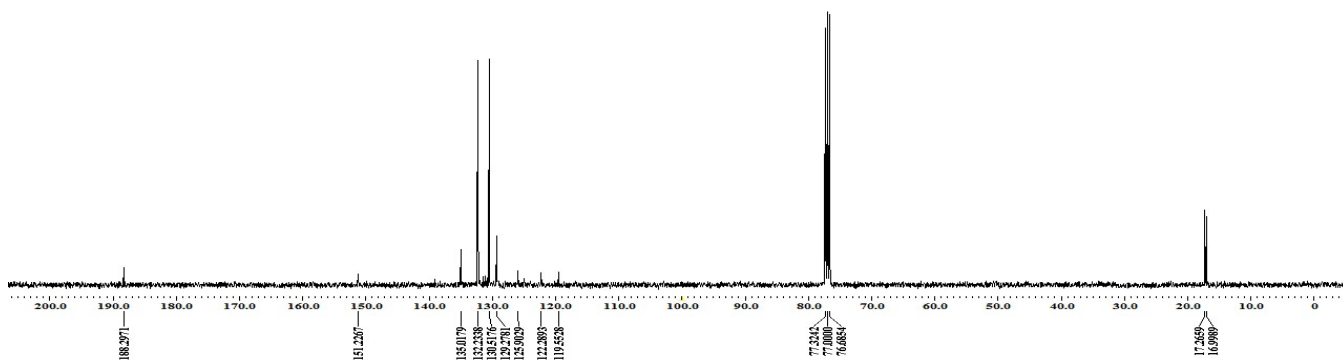

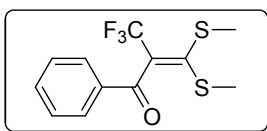

3a

Data File SBNS318.d Sample Name SBNS318  
 Sample Type Sample Position P2A3  
 Instrument Name Instrument 1 User Name lcmsdu-PC\admin  
 IRM Calibration Status Success DA Method Default.m  
 Comment

Sample Group Info.  
 Acquisition SW 6200 series TOF/6500 series  
 Version Q-TOF B.05.01 (B5125)

Compound Table

| Compound Label         | RT    | Mass     | Formula         | MFG Formula     | MFG Diff (ppm) | DB Formula      |
|------------------------|-------|----------|-----------------|-----------------|----------------|-----------------|
| Cpd 7: C12 H11 F3 O S2 | 0.204 | 292.0209 | C12 H11 F3 O S2 | C12 H11 F3 O S2 | -1.85          | C12 H11 F3 O S2 |

| Compound Label         | m/z      | RT    | Algorithm                 | Mass     |
|------------------------|----------|-------|---------------------------|----------|
| Cpd 7: C12 H11 F3 O S2 | 293.0282 | 0.204 | Find by Molecular Feature | 292.0209 |

MFE MS Spectrum

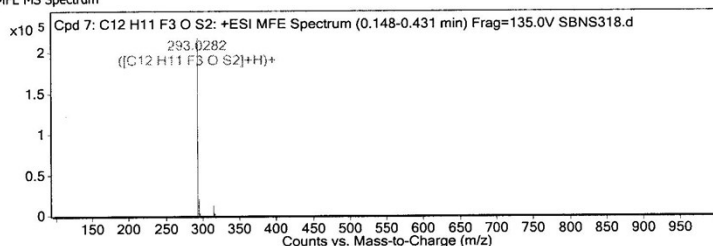

MFE MS Zoomed Spectrum

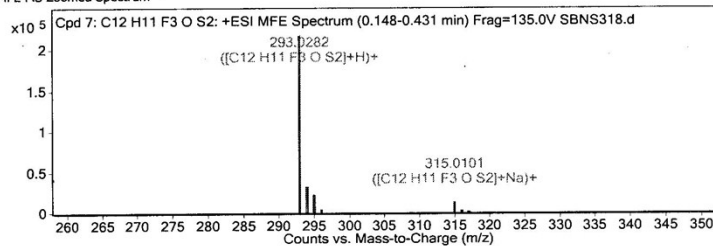

MS Spectrum Peak List

| m/z      | z | Abund     | Formula         | Ion     |
|----------|---|-----------|-----------------|---------|
| 293.0282 | 1 | 218569.19 | C12 H11 F3 O S2 | (M+H)+  |
| 294.0312 | 1 | 31013.34  | C12 H11 F3 O S2 | (M+H)+  |
| 295.025  | 1 | 20199.12  | C12 H11 F3 O S2 | (M+H)+  |
| 296.0267 | 1 | 2891.79   | C12 H11 F3 O S2 | (M+H)+  |
| 315.0101 | 1 | 12451.48  | C12 H11 F3 O S2 | (M+Na)+ |
| 316.0135 | 1 | 1928.45   | C12 H11 F3 O S2 | (M+Na)+ |
| 317.0083 | 1 | 1555.29   | C12 H11 F3 O S2 | (M+Na)+ |
| 318.009  | 1 | 155.1     | C12 H11 F3 O S2 | (M+Na)+ |

--- End Of Report ---

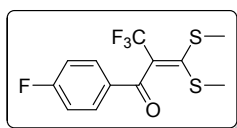

**3b**

$^1\text{H-NMR}$  in  $\text{CDCl}_3$  (400MHz)

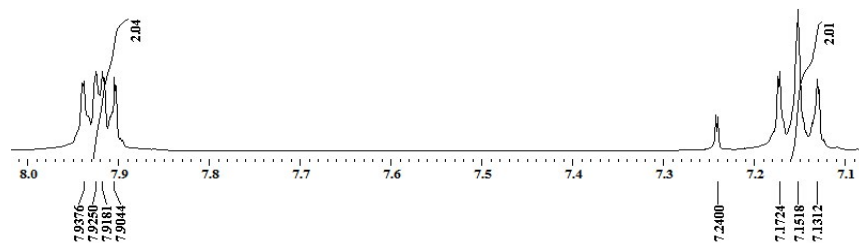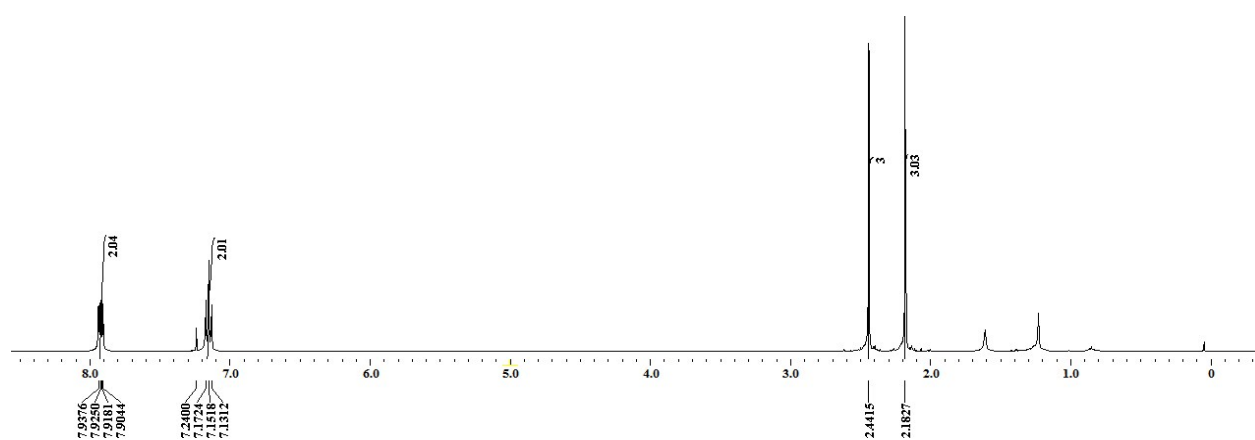

$^{13}\text{C-NMR}$  in  $\text{CDCl}_3$  (100MHz)

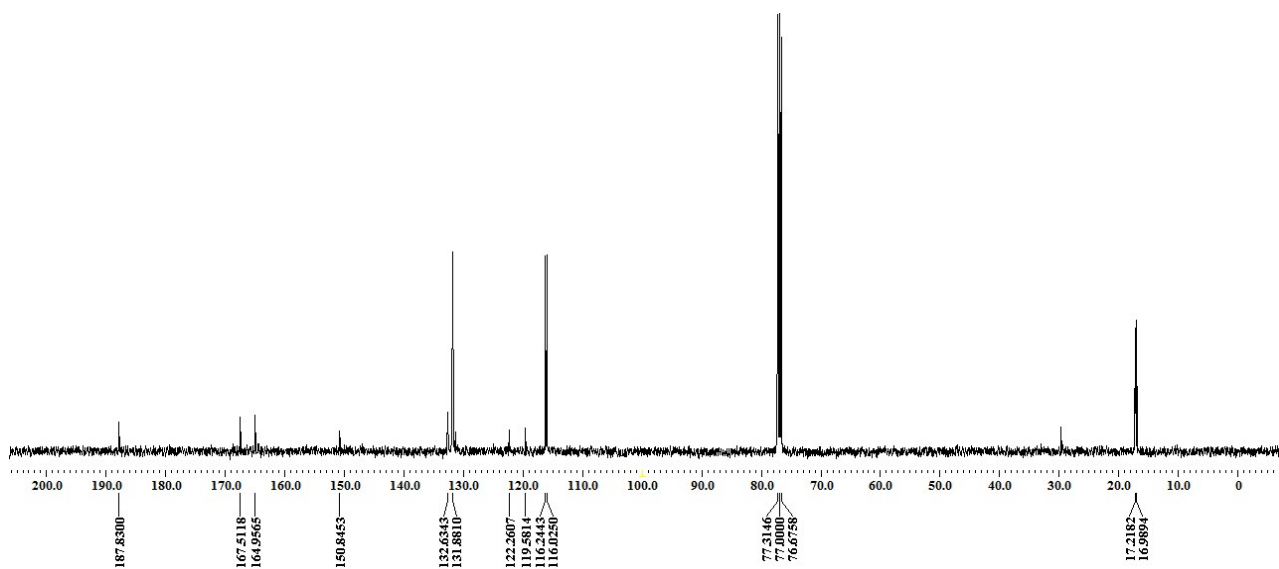

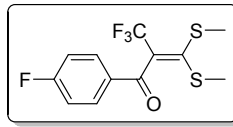

### 3b

**Data File** SB-NS-348.d      **Sample Name** SB-NS-348  
**Sample Type** Sample      **Position** P2E8  
**Instrument Name** Instrument 1      **User Name** lcmsdu-PC\admin

**IRM Calibration Status** Success      **DA Method** Default.m  
**Comment**

**Sample Group** Info.  
**Acquisition SW** 6200 series TOF/6500 series  
**Version** Q-TOF B.05.01 (B5125)

#### Compound Table

| Compound Label         | RT    | Mass     | Formula         | MFG Formula     | MFG Diff (ppm) | DB Formula      |
|------------------------|-------|----------|-----------------|-----------------|----------------|-----------------|
| Cpd 2: C12 H10 F4 O S2 | 0.202 | 310.0105 | C12 H10 F4 O S2 | C12 H10 F4 O S2 | 1.25           | C12 H10 F4 O S2 |

| Compound Label         | m/z      | RT    | Algorithm                 | Mass     |
|------------------------|----------|-------|---------------------------|----------|
| Cpd 2: C12 H10 F4 O S2 | 311.0177 | 0.202 | Find by Molecular Feature | 310.0105 |

#### MFE MS Spectrum

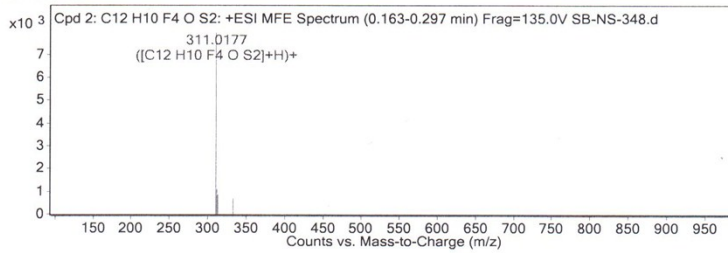

#### MFE MS Zoomed Spectrum

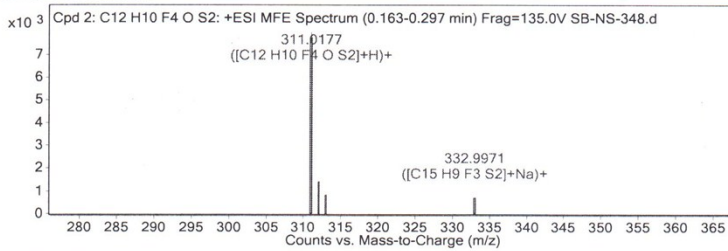

#### MS Spectrum Peak List

| m/z      | z | Abund   | Formula         | Ion     |
|----------|---|---------|-----------------|---------|
| 311.0177 | 1 | 7975.05 | C12 H10 F4 O S2 | (M+H)+  |
| 312.0213 | 1 | 1119.29 | C12 H10 F4 O S2 | (M+H)+  |
| 313.0155 | 1 | 843.83  | C12 H10 F4 O S2 | (M+H)+  |
| 332.9971 | 1 | 700.81  | C15 H9 F3 S2    | (M+Na)+ |

--- End Of Report ---

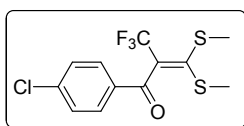

3c

$^1\text{H-NMR}$  in  $\text{CDCl}_3$  (400MHz)

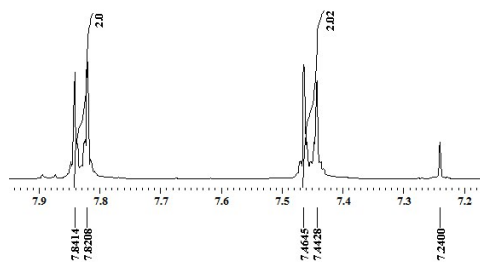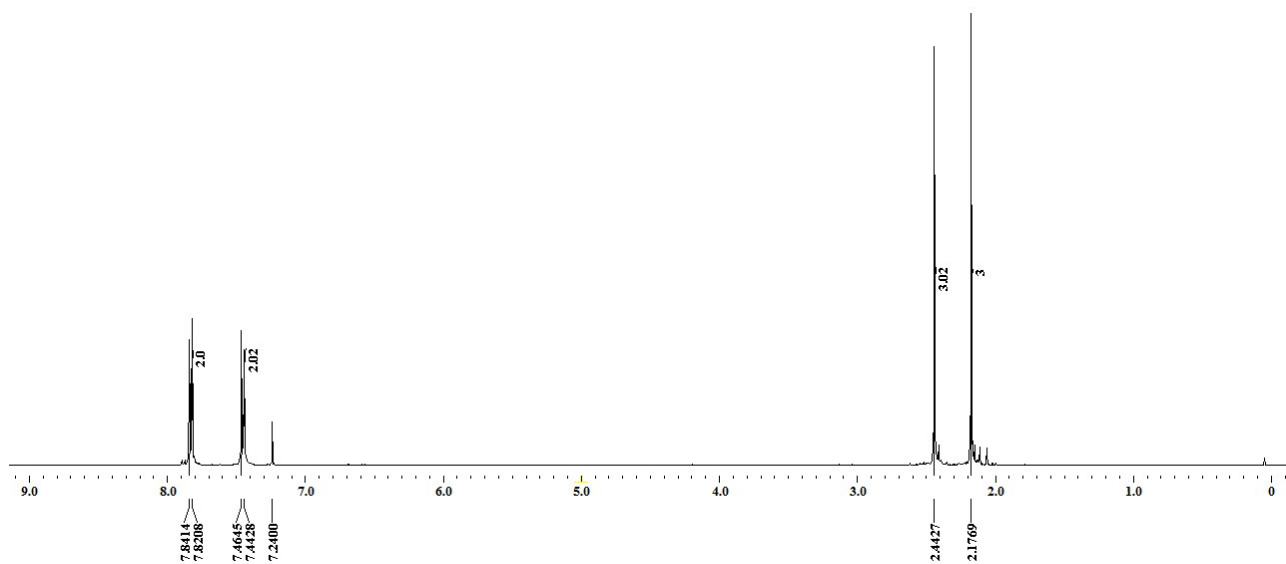

$^{13}\text{C-NMR}$  in  $\text{CDCl}_3$  (100MHz)

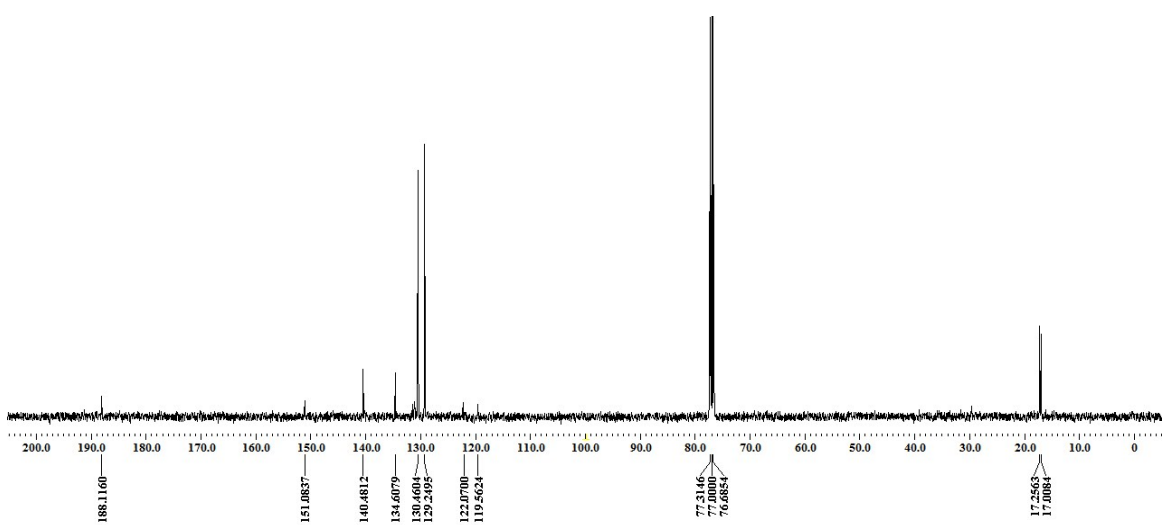

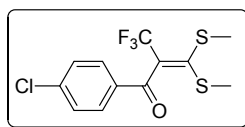

3c

|               |           |             |      |                 |                |                        |                 |
|---------------|-----------|-------------|------|-----------------|----------------|------------------------|-----------------|
| Sample Name   | SBNS355   | Position    | P2F8 | Instrument Name | 6530 QTOF LCMS | User Name              | lcmsdu-PC\admin |
| Inj Vol       | 1         | InjPosition |      | SampleType      | Sample         | IRM Calibration Status | Success         |
| Data Filename | SBNS355.d |             |      |                 |                |                        |                 |

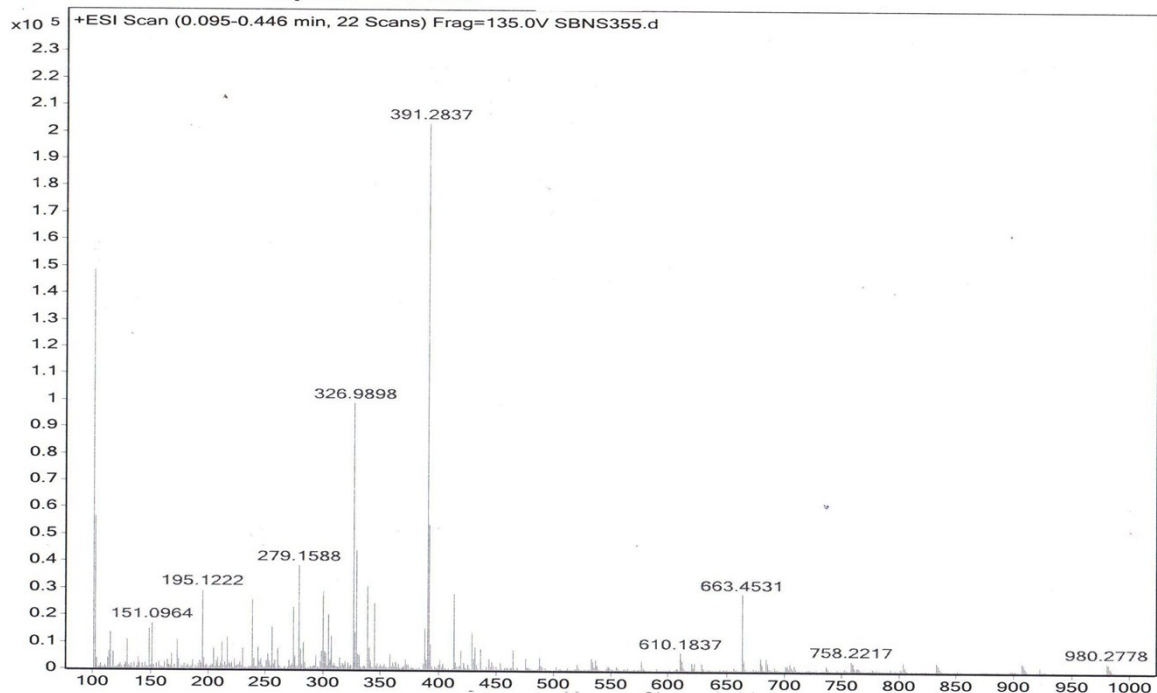

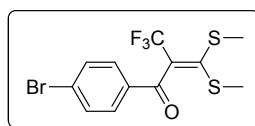

3d

<sup>1</sup>H-NMR in CDCl<sub>3</sub> (400MHz)

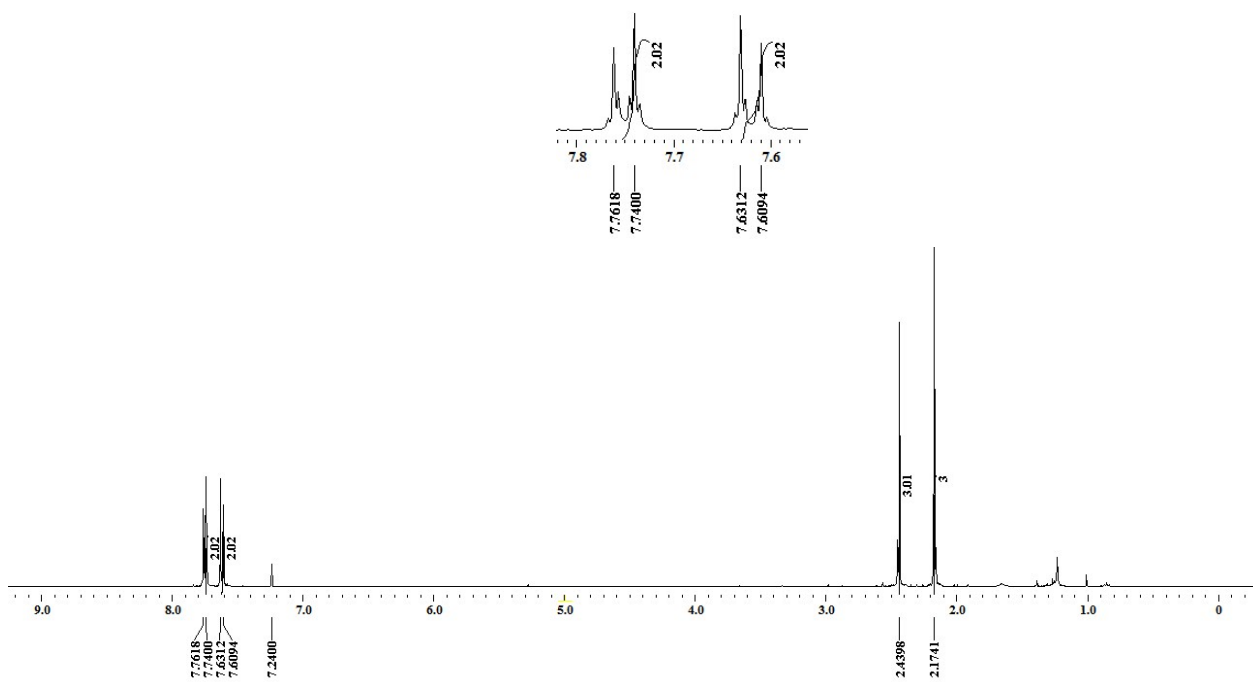

<sup>13</sup>C-NMR in CDCl<sub>3</sub> (100MHz)

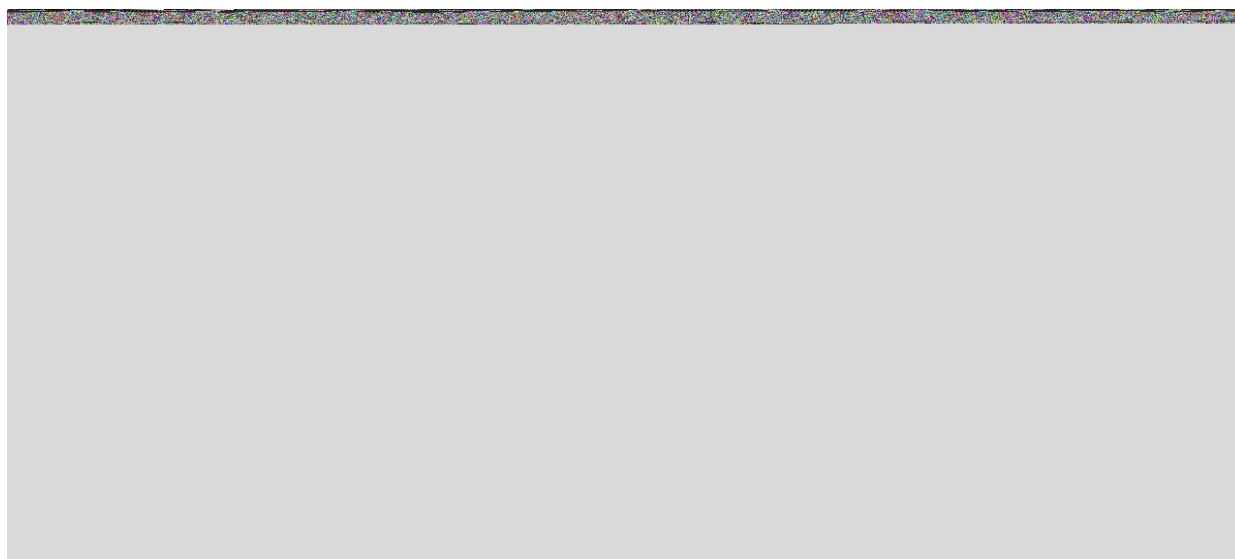

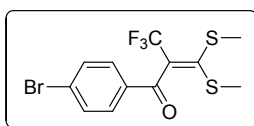

### 3d

|                               |              |                      |                     |
|-------------------------------|--------------|----------------------|---------------------|
| <b>Data File</b>              | SB-NS-392.d  | <b>Sample Name</b>   | SB-NS-392           |
| <b>Sample Type</b>            | Sample       | <b>Position</b>      | P1-B4               |
| <b>Instrument Name</b>        | Instrument 1 | <b>User Name</b>     |                     |
| <b>Acq Method</b>             | 29.10.2014.m | <b>Acquired Time</b> | 09-06-2016 14:23:54 |
| <b>IRM Calibration Status</b> | Success      | <b>DA Method</b>     | Default.m           |
| <b>Comment</b>                |              |                      |                     |

|                       |                             |              |
|-----------------------|-----------------------------|--------------|
| <b>Sample Group</b>   |                             | <b>Info.</b> |
| <b>Acquisition SW</b> | 6200 series TOF/6500 series |              |
| <b>Version</b>        | Q-TOF B.05.01 (B5125)       |              |

#### Compound Table

| Compound Label             | RT | Mass     | Formula            | MFG Formula        | MFG Diff (ppm) | DB Formula         |
|----------------------------|----|----------|--------------------|--------------------|----------------|--------------------|
| Cpd 38: C12 H10 Br F3 O S2 | 12 | 369.9311 | C12 H10 Br F3 O S2 | C12 H10 Br F3 O S2 | -0.73          | C12 H10 Br F3 O S2 |

| Compound Label             | m/z      | RT | Algorithm                 | Mass     |
|----------------------------|----------|----|---------------------------|----------|
| Cpd 38: C12 H10 Br F3 O S2 | 370.9381 | 12 | Find by Molecular Feature | 369.9311 |

#### MFE MS Spectrum

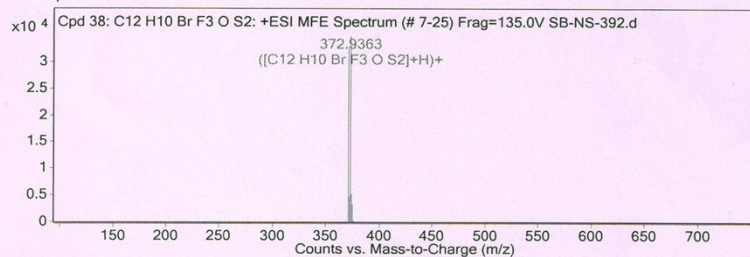

#### MFE MS Zoomed Spectrum

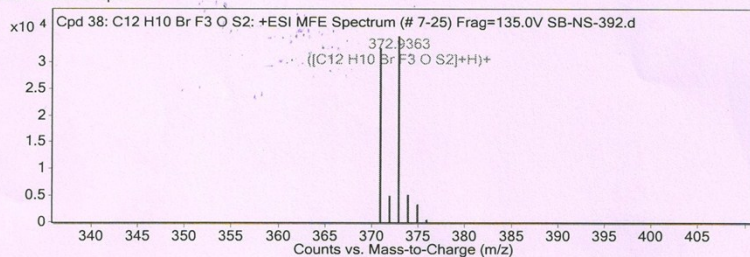

#### MS Spectrum Peak List

| m/z      | z | Abund    | Formula            | Ion    |
|----------|---|----------|--------------------|--------|
| 370.9381 | 1 | 32896.02 | C12 H10 Br F3 O S2 | (M+H)+ |
| 371.9421 | 1 | 4643.4   | C12 H10 Br F3 O S2 | (M+H)+ |
| 372.9363 | 1 | 34831.87 | C12 H10 Br F3 O S2 | (M+H)+ |
| 373.9398 | 1 | 5186.56  | C12 H10 Br F3 O S2 | (M+H)+ |
| 374.9332 | 1 | 3230.62  | C12 H10 Br F3 O S2 | (M+H)+ |
| 375.9368 | 1 | 295.27   | C12 H10 Br F3 O S2 | (M+H)+ |

--- End Of Report ---



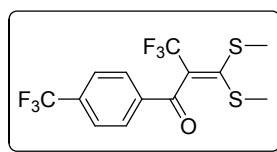

3e

<sup>1</sup>H-NMR in CDCl<sub>3</sub> (400MHz)

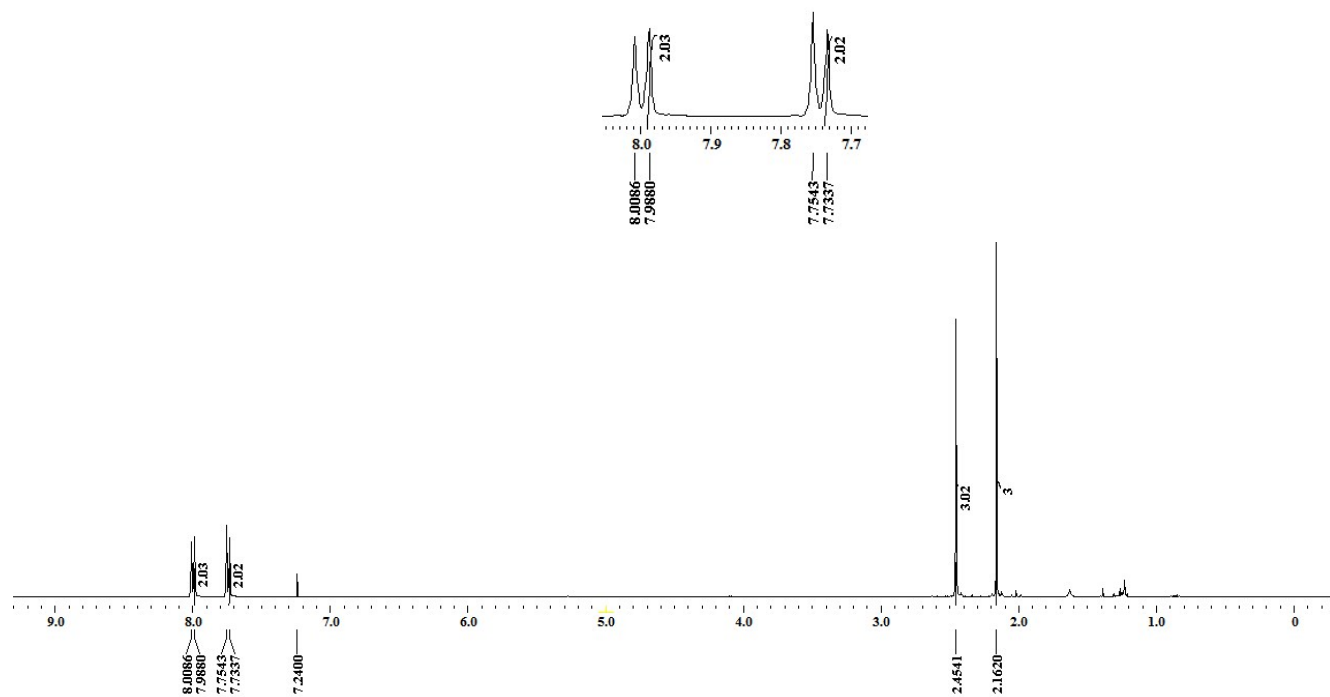

<sup>13</sup>C-NMR in CDCl<sub>3</sub> (100MHz)

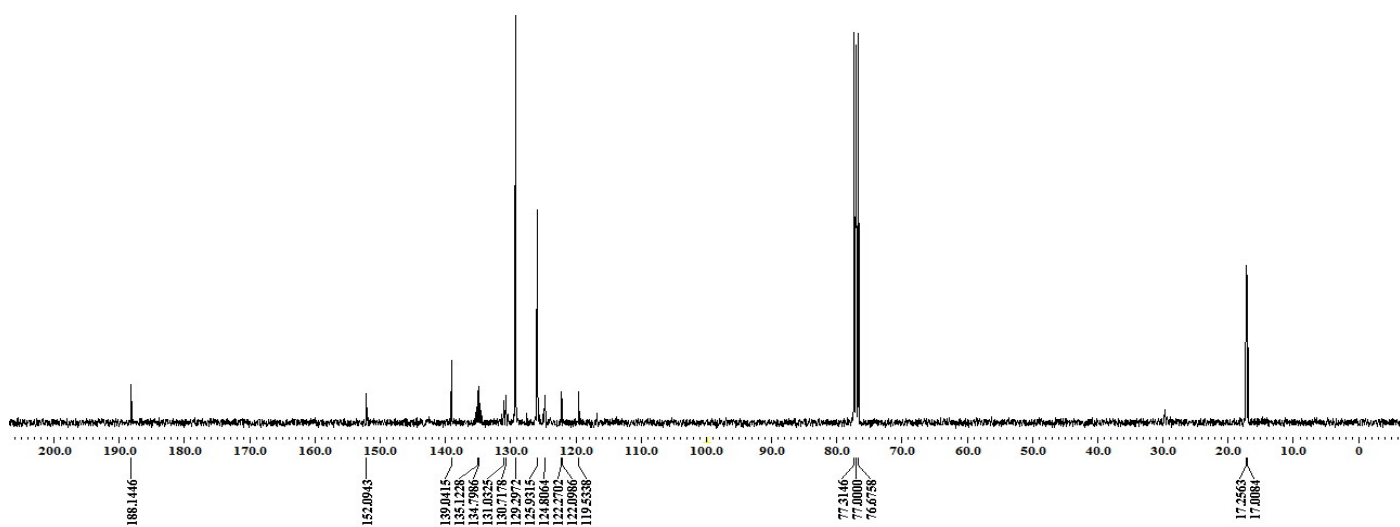

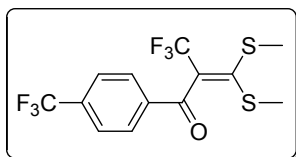

3e

Data File SB-NS-380.d Sample Name SB-NS-380  
 Sample Type Sample Position P1F3  
 Instrument Name Instrument 1 User Name lcmsdu-PC\admin  
 Acq Method 29.10.2014.m  
 IRM Calibration Status Success DA Method Default.m  
 Comment

Sample Group Info.  
 Acquisition SW 6200 series TOF/6500 series  
 Version Q-TOF B.05.01 (B5125)

Compound Table

| Compound Label         | RT    | Mass     | Formula         | MFG Formula     | MFG Diff (ppm) | DB Formula      |
|------------------------|-------|----------|-----------------|-----------------|----------------|-----------------|
| Cpd 3: C13 H10 F6 O S2 | 0.199 | 360.0083 | C13 H10 F6 O S2 | C13 H10 F6 O S2 | -1.6           | C13 H10 F6 O S2 |

| Compound Label         | m/z      | RT    | Algorithm                 | Mass     |
|------------------------|----------|-------|---------------------------|----------|
| Cpd 3: C13 H10 F6 O S2 | 361.0156 | 0.199 | Find by Molecular Feature | 360.0083 |

MFE MS Spectrum

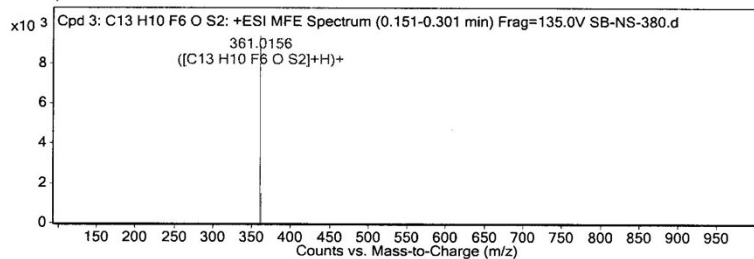

MFE MS Zoomed Spectrum

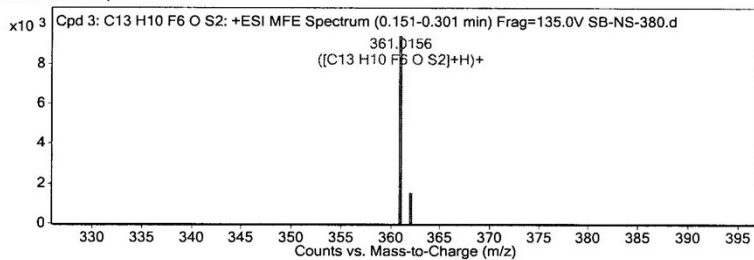

MS Spectrum Peak List

| m/z      | z | Abund   | Formula         | Ion    |
|----------|---|---------|-----------------|--------|
| 361.0156 | 1 | 9403.09 | C13 H10 F6 O S2 | (M+H)+ |
| 362.0182 | 1 | 1485.17 | C13 H10 F6 O S2 | (M+H)+ |

--- End Of Report ---

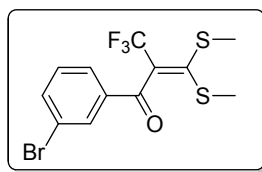

3f

<sup>1</sup>H-NMR in CDCl<sub>3</sub> (400MHz)

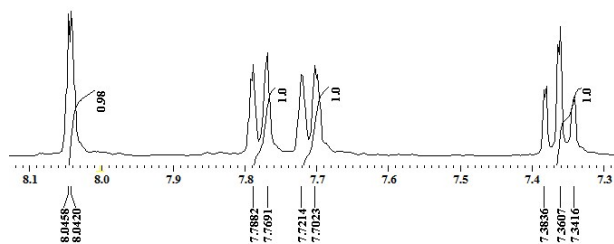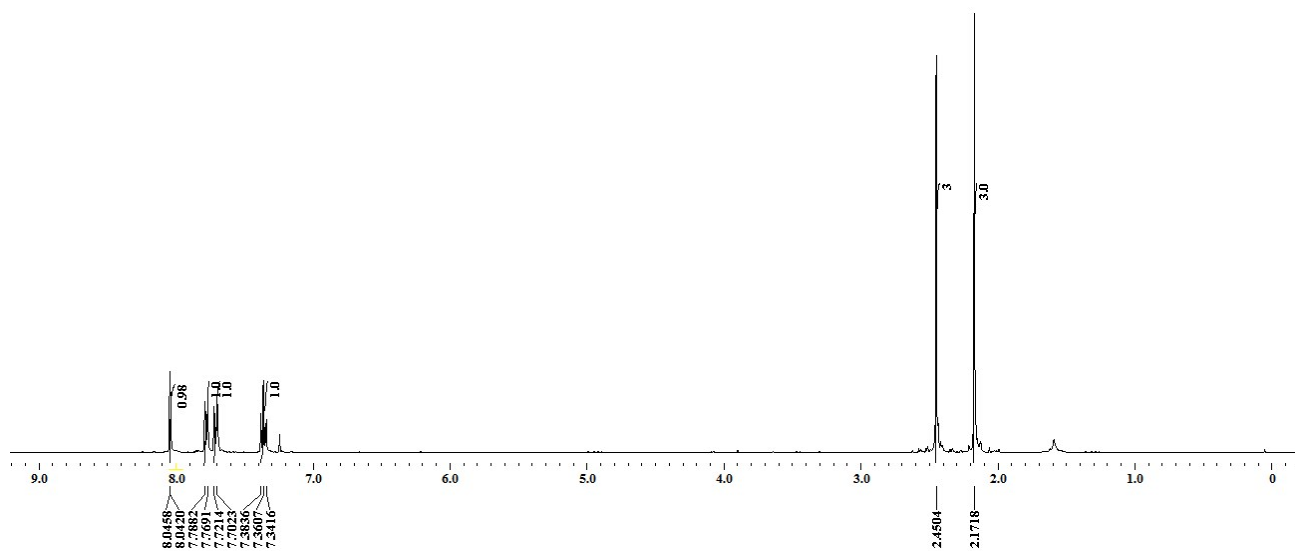

<sup>13</sup>C-NMR in CDCl<sub>3</sub> (100MHz)

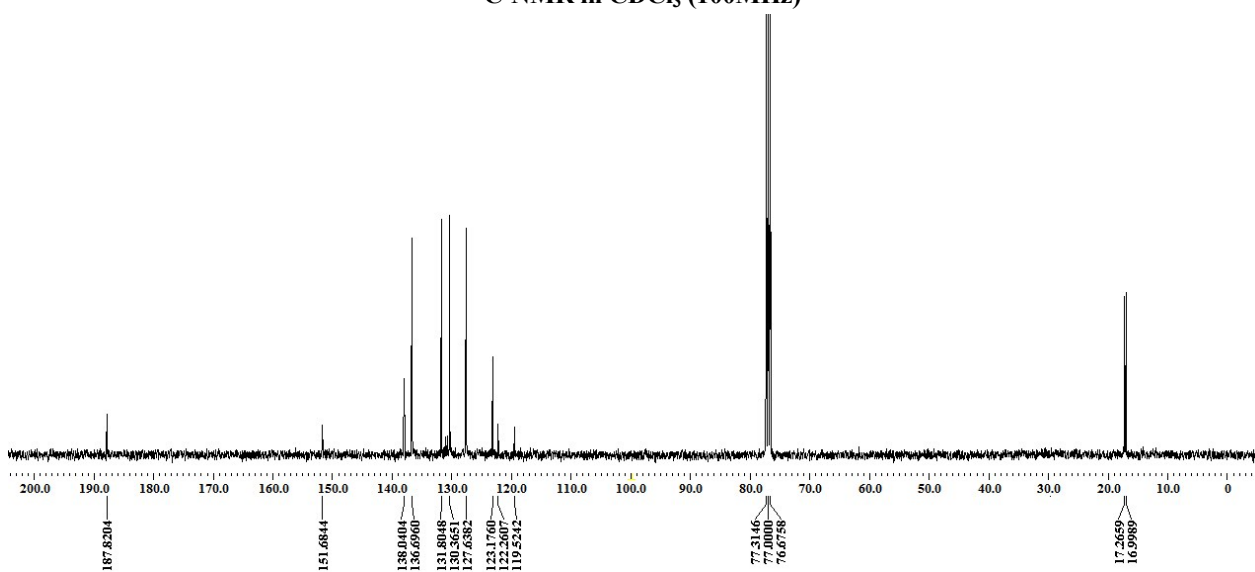

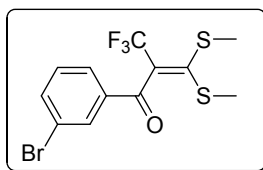

3f

**Data File** EXP-408.d **Sample Name** EXP-408  
**Sample Type** Sample **Position** P2E1  
**Instrument Name** Instrument 1 **User Name** lcmsdu-PC\admin  
**IRM Calibration Status** Success **DA Method** Default.m  
**Comment**

**Sample Group** Info.  
**Acquisition SW** 6200 series TOF/6500 series  
**Version** Q-TOF B.05.01 (B5125)

**Compound Table**

| Compound Label             | RT    | Mass     | Formula            | MFG Formula        | MFG Diff (ppm) | DB Formula         |
|----------------------------|-------|----------|--------------------|--------------------|----------------|--------------------|
| Cpd 23: C12 H10 Br F3 O S2 | 0.196 | 369.9318 | C12 H10 Br F3 O S2 | C12 H10 Br F3 O S2 | -2.5           | C12 H10 Br F3 O S2 |

| Compound Label             | m/z      | RT    | Algorithm                 | Mass     |
|----------------------------|----------|-------|---------------------------|----------|
| Cpd 23: C12 H10 Br F3 O S2 | 370.9389 | 0.196 | Find by Molecular Feature | 369.9318 |

**MFE MS Spectrum**

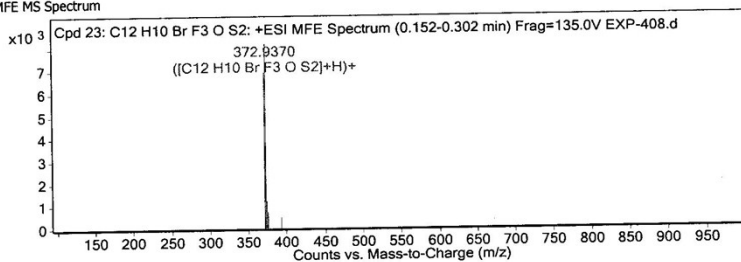

**MFE MS Zoomed Spectrum**

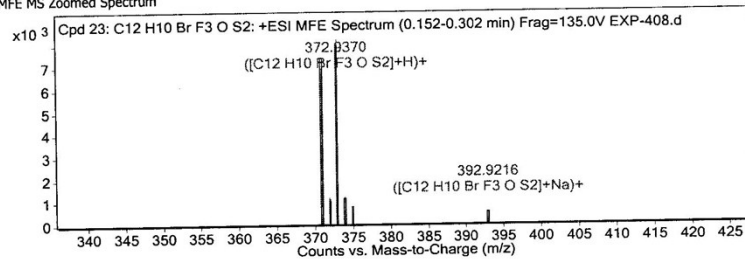

**MS Spectrum Peak List**

| m/z      | z | Abund   | Formula            | Ion     |
|----------|---|---------|--------------------|---------|
| 370.9389 | 1 | 6933.57 | C12 H10 Br F3 O S2 | (M+H)+  |
| 371.9424 | 1 | 1170.93 | C12 H10 Br F3 O S2 | (M+H)+  |
| 372.937  | 1 | 8203.74 | C12 H10 Br F3 O S2 | (M+H)+  |
| 373.9384 | 1 | 1207.36 | C12 H10 Br F3 O S2 | (M+H)+  |
| 374.936  | 1 | 739.39  | C12 H10 Br F3 O S2 | (M+H)+  |
| 392.9216 | 1 | 508.03  | C12 H10 Br F3 O S2 | (M+Na)+ |

--- End Of Report ---

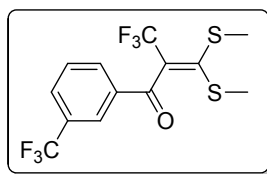

**3g**

**<sup>1</sup>H-NMR in CDCl<sub>3</sub> (400MHz)**

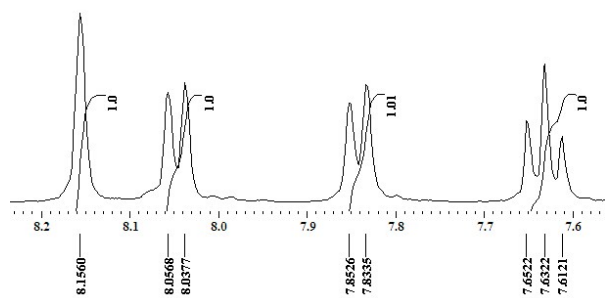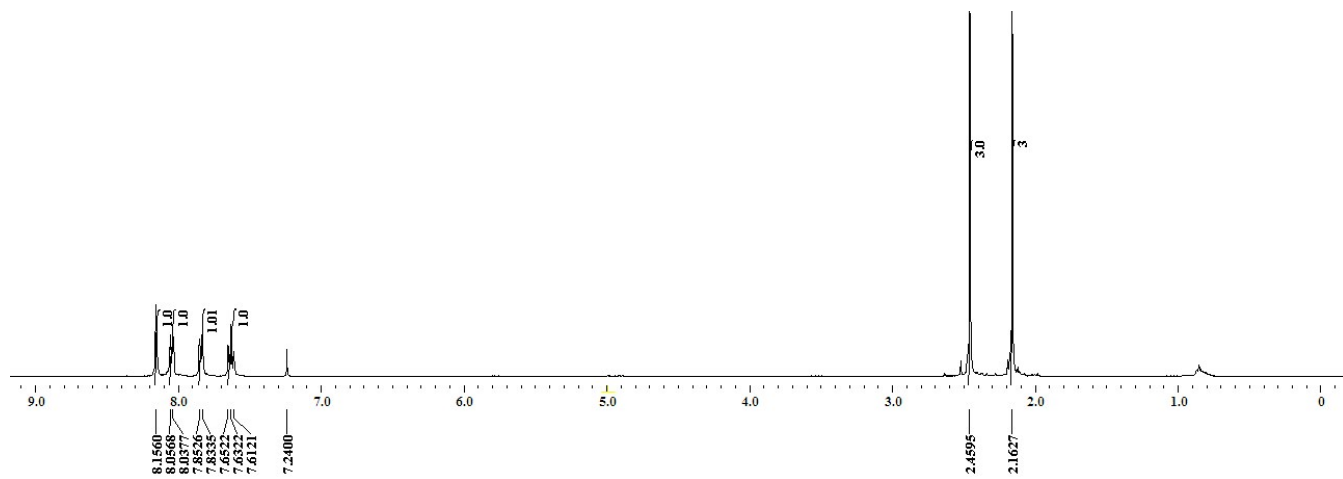

**<sup>13</sup>C-NMR in CDCl<sub>3</sub> (100MHz)**

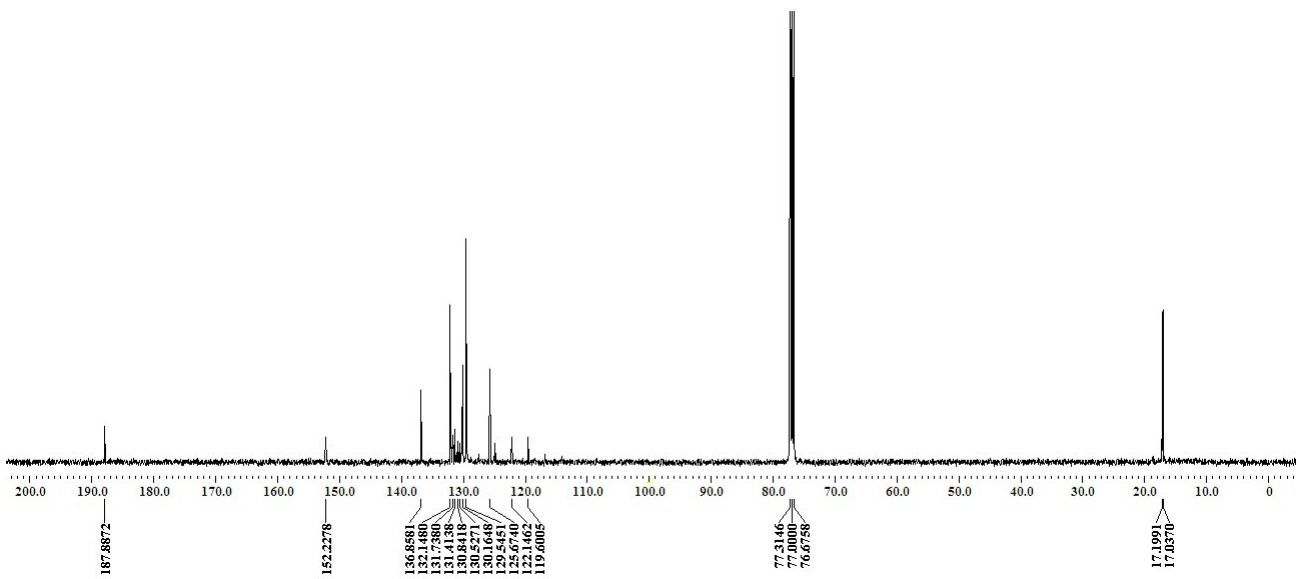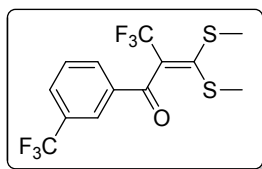

**3g**

**Data File** SB-NS-383.d      **Sample Name** SB-NS-380  
**Sample Type** Sample      **Position** P1F3  
**Instrument Name** Instrument 1      **User Name** lcmsdu-PC\admin  
**Acq Method** 29.10.2014.m  
**IRM Calibration Status** Success      **DA Method** Default.m  
**Comment**

**Sample Group**      **Info.**  
**Acquisition SW** 6200 series TOF/6500 series  
**Version** Q-TOF B.05.01 (B5125)

**Compound Table**

| Compound Label         | RT    | Mass     | Formula         | MFG Formula     | MFG Diff (ppm) | DB Formula      |
|------------------------|-------|----------|-----------------|-----------------|----------------|-----------------|
| Cpd 3: C13 H10 F6 O S2 | 0.199 | 360.0083 | C13 H10 F6 O S2 | C13 H10 F6 O S2 | -1.6           | C13 H10 F6 O S2 |

| Compound Label         | m/z      | RT    | Algorithm                 | Mass     |
|------------------------|----------|-------|---------------------------|----------|
| Cpd 3: C13 H10 F6 O S2 | 361.0156 | 0.199 | Find by Molecular Feature | 360.0083 |

**MFE MS Spectrum**

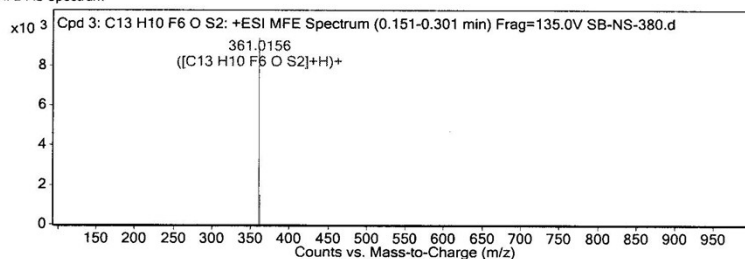

**MFE MS Zoomed Spectrum**

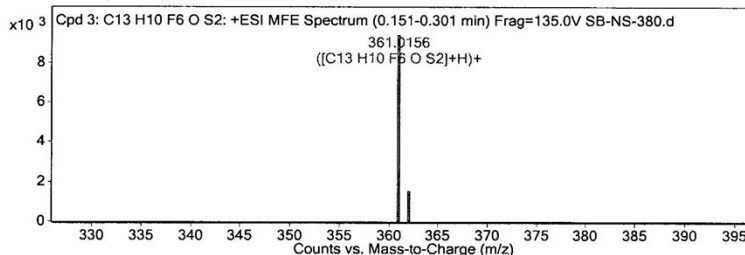

**MS Spectrum Peak List**

| m/z      | z | Abund   | Formula         | Ion    |
|----------|---|---------|-----------------|--------|
| 361.0156 | 1 | 9403.09 | C13 H10 F6 O S2 | (M+H)+ |
| 362.0182 | 1 | 1485.17 | C13 H10 F6 O S2 | (M+H)+ |

--- End Of Report ---

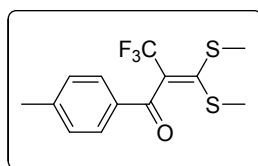

**3h**

**<sup>1</sup>H-NMR in CDCl<sub>3</sub> (400MHz)**

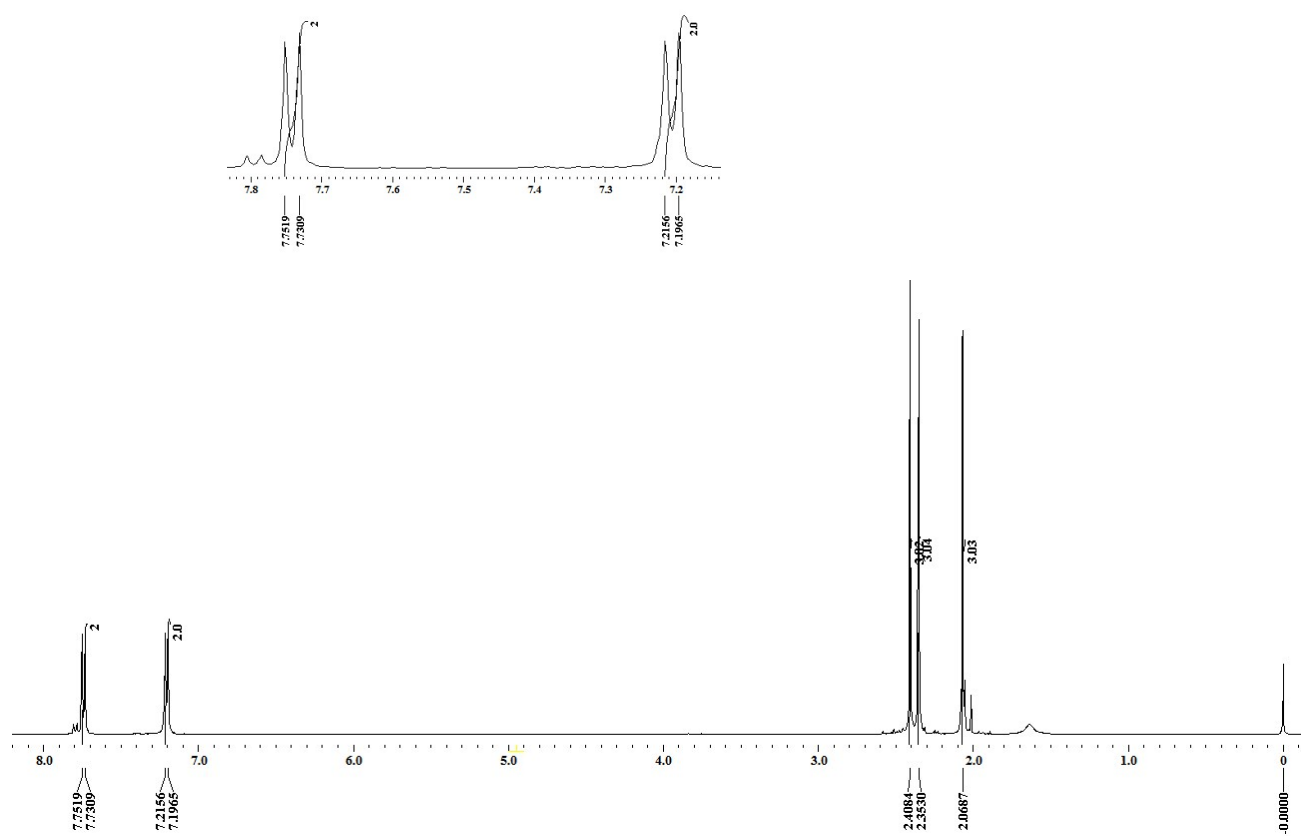

$^{13}\text{C}$ -NMR in  $\text{CDCl}_3$  (100MHz)

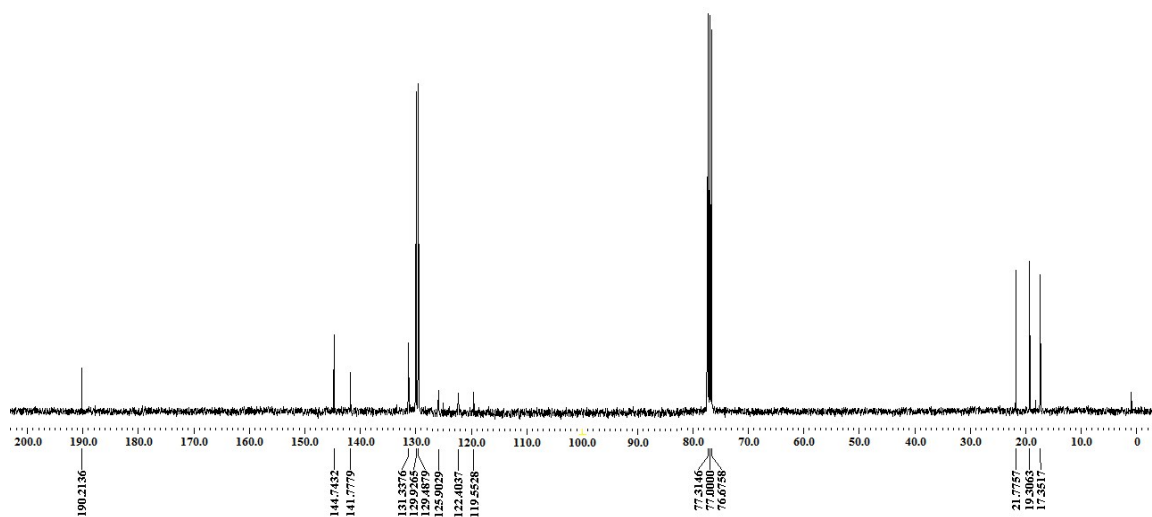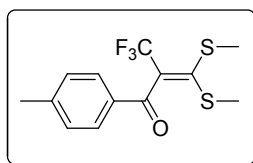

**3h**



Data File EXP346.d Sample Name EXP346  
 Sample Type Sample Position P1F6  
 Instrument Name Instrument 1 User Name lcmsdu-PC\admin

IRM Calibration Status Success DA Method Default.m  
 Comment

Sample Group Info.  
 Acquisition SW 6200 series TOF/6500 series  
 Version Q-TOF B.05.01 (B5125)

**Compound Table**

| Compound Label         | RT    | Mass     | Formula         | MFG Formula     | MFG Diff (ppm) | DB Formula      |
|------------------------|-------|----------|-----------------|-----------------|----------------|-----------------|
| Cpd 1: C13 H13 F3 O S2 | 0.215 | 306.0384 | C13 H13 F3 O S2 | C13 H13 F3 O S2 | -7.94          | C13 H13 F3 O S2 |

| Compound Label         | m/z      | RT    | Algorithm                 | Mass     |
|------------------------|----------|-------|---------------------------|----------|
| Cpd 1: C13 H13 F3 O S2 | 307.0457 | 0.215 | Find by Molecular Feature | 306.0384 |

MFE MS Spectrum

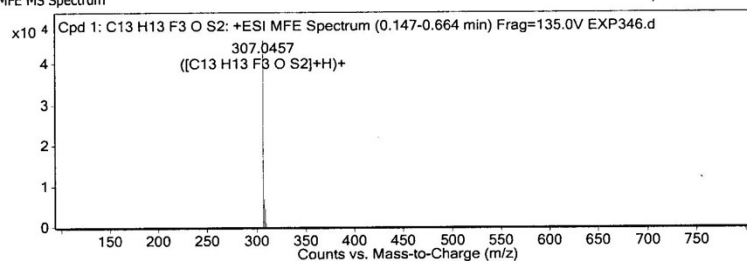

MFE MS Zoomed Spectrum

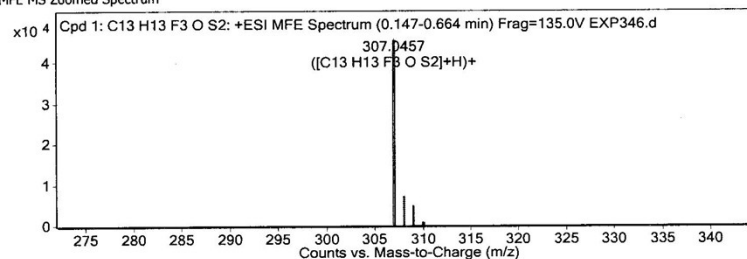

MS Spectrum Peak List

| m/z      | z | Abund   | Formula         | Ion    |
|----------|---|---------|-----------------|--------|
| 307.0457 | 1 | 45739.2 | C13 H13 F3 O S2 | (M+H)+ |
| 308.0496 | 1 | 6862.78 | C13 H13 F3 O S2 | (M+H)+ |
| 309.0411 | 1 | 4587.63 | C13 H13 F3 O S2 | (M+H)+ |
| 310.046  | 1 | 596.13  | C13 H13 F3 O S2 | (M+H)+ |

--- End Of Report ---

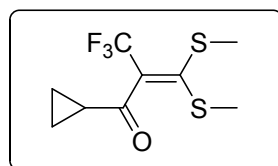

3i

<sup>1</sup>H-NMR in CDCl<sub>3</sub> (400MHz)

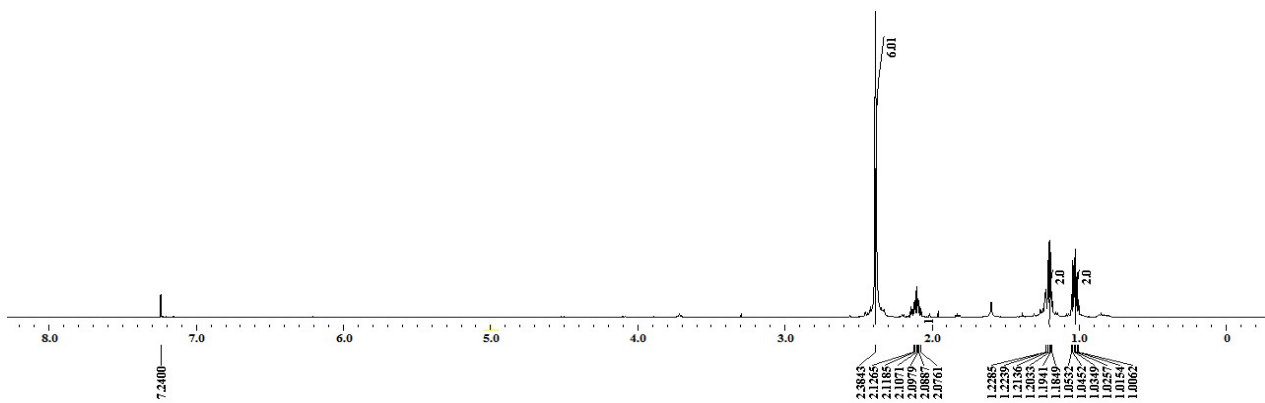

**<sup>13</sup>C-NMR in CDCl<sub>3</sub> (100MHz)**

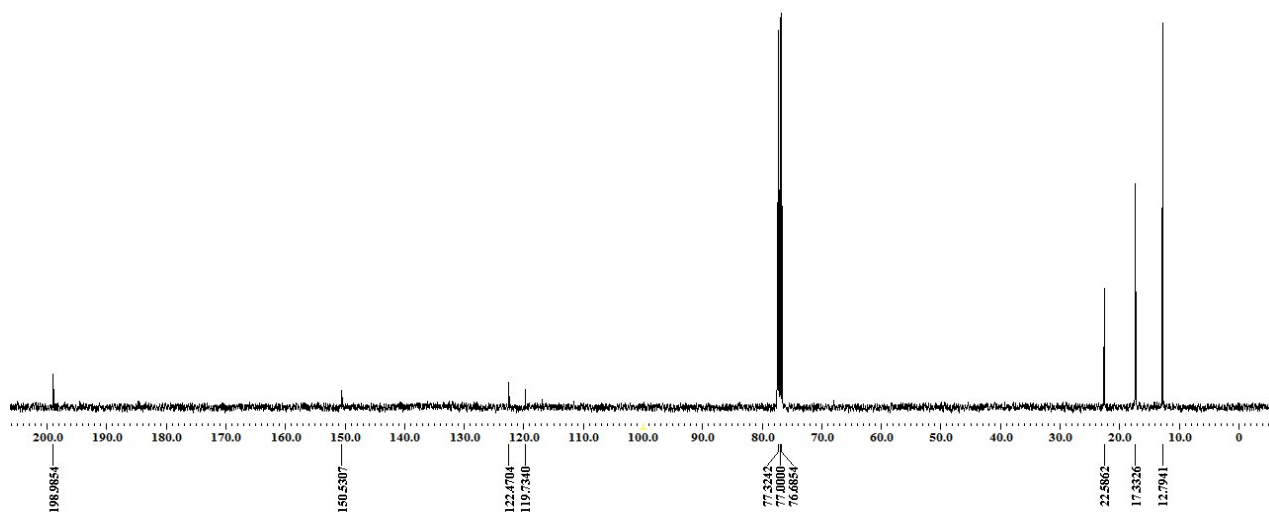

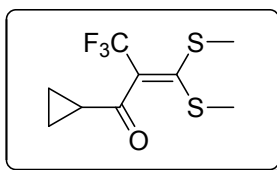

3i

**Data File** SBNS368.d **Sample Name** SBNS368  
**Sample Type** Sample **Position** P2D4  
**Instrument Name** Instrument 1 **User Name** lcmsdu-PC\admin

**IRM Calibration Status** Success **DA Method** Default.m  
**Comment**

**Sample Group** Info.  
**Acquisition SW** 6200 series TOF/6500 series  
**Version** Q-TOF B.05.01 (B5125)

**Compound Table**

| Compound Label         | RT    | Mass     | Formula        | MFG Formula    | MFG Diff (ppm) | DB Formula     |
|------------------------|-------|----------|----------------|----------------|----------------|----------------|
| Cpd 27: C9 H11 F3 O S2 | 0.196 | 256.0207 | C9 H11 F3 O S2 | C9 H11 F3 O S2 | -1.26          | C9 H11 F3 O S2 |

| Compound Label         | m/z     | RT    | Algorithm                 | Mass     |
|------------------------|---------|-------|---------------------------|----------|
| Cpd 27: C9 H11 F3 O S2 | 257.028 | 0.196 | Find by Molecular Feature | 256.0207 |

**MFE MS Spectrum**

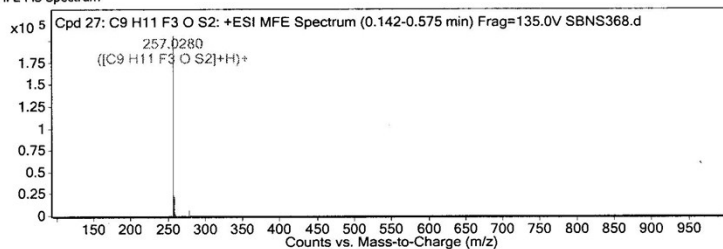

**MFE MS Zoomed Spectrum**

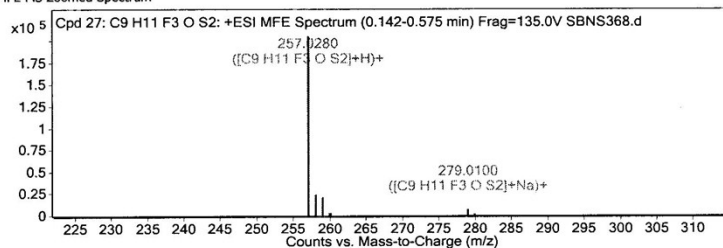

**MS Spectrum Peak List**

| m/z      | z | Abund     | Formula        | Ion     |
|----------|---|-----------|----------------|---------|
| 257.028  | 1 | 205398.03 | C9 H11 F3 O S2 | (M+H)+  |
| 258.0309 | 1 | 22227.01  | C9 H11 F3 O S2 | (M+H)+  |
| 259.0239 | 1 | 20336.6   | C9 H11 F3 O S2 | (M+H)+  |
| 260.0284 | 1 | 2383.76   | C9 H11 F3 O S2 | (M+H)+  |
| 279.01   | 1 | 6269.26   | C9 H11 F3 O S2 | (M+Na)+ |
| 280.0143 | 1 | 768.19    | C9 H11 F3 O S2 | (M+Na)+ |

--- End Of Report ---

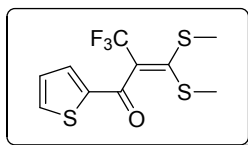

3j

<sup>1</sup>H-NMR in CDCl<sub>3</sub> (400MHz)

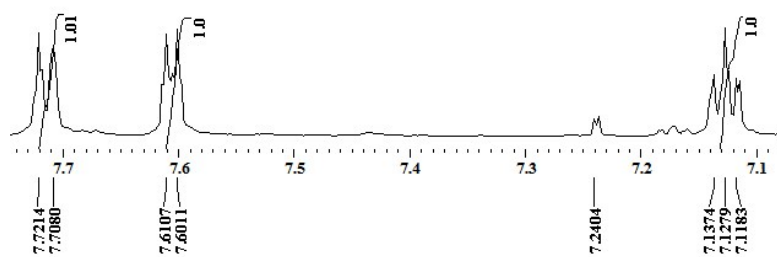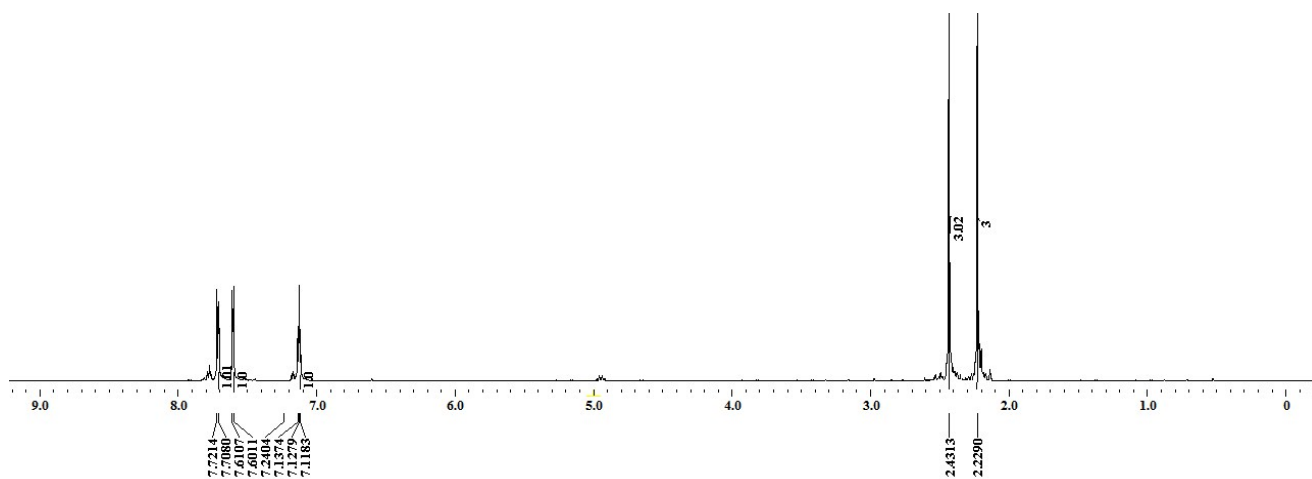

<sup>13</sup>C-NMR in CDCl<sub>3</sub> (100MHz)

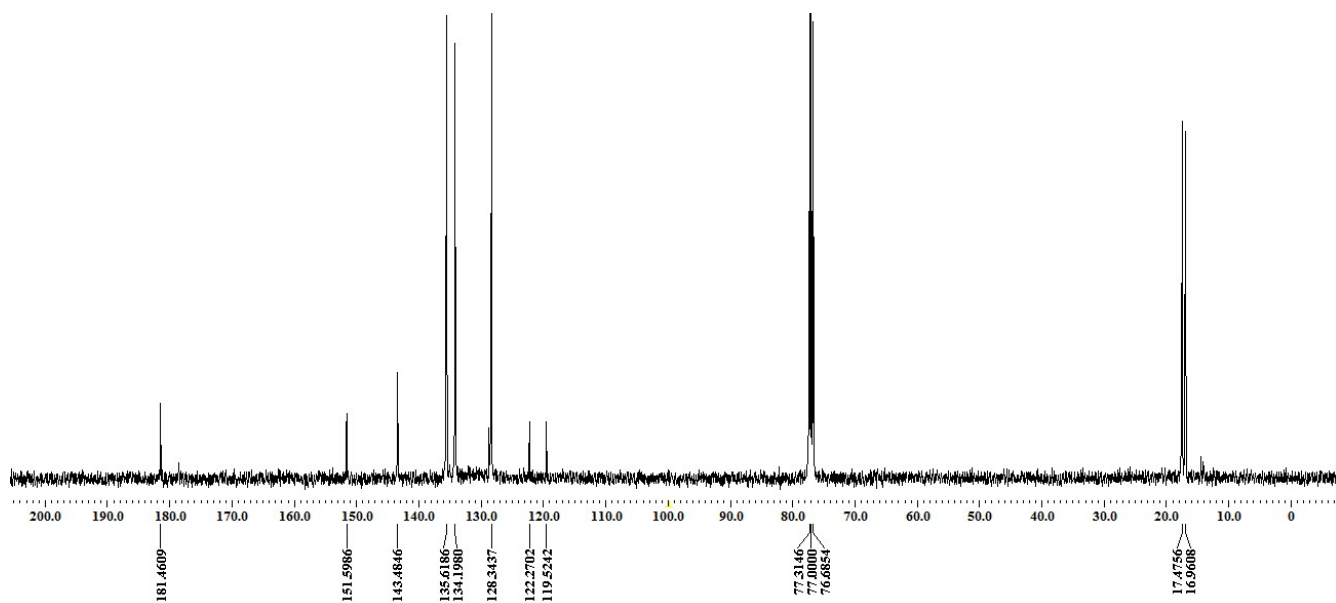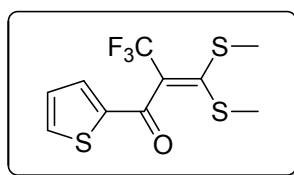

3j

**Data File** EXP361.d **Sample Name** EXP361  
**Sample Type** Sample **Position** P1E2  
**Instrument Name** Instrument 1 **User Name** lcmsdu-PC\admin  
**IRM Calibration Status**  **DA Method** Default.m  
**Comment**

**Sample Group** Info.  
**Acquisition SW** 6200 series TOF/6500 series  
**Version** Q-TOF B.05.01 (B5125)

**Compound Table**

| Compound Label        | RT    | Mass     | Formula        | MFG Formula    | MFG Diff (ppm) | DB Formula     |
|-----------------------|-------|----------|----------------|----------------|----------------|----------------|
| Cpd 4: C10 H9 F3 O S3 | 0.197 | 297.9767 | C10 H9 F3 O S3 | C10 H9 F3 O S3 | 0.17           | C10 H9 F3 O S3 |

| Compound Label        | m/z      | RT    | Algorithm                 | Mass     |
|-----------------------|----------|-------|---------------------------|----------|
| Cpd 4: C10 H9 F3 O S3 | 298.9839 | 0.197 | Find by Molecular Feature | 297.9767 |

**MFE MS Spectrum**

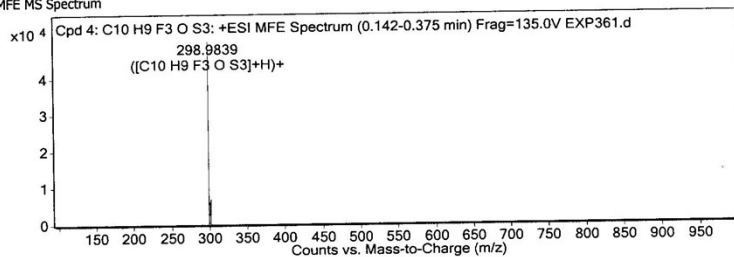

**MFE MS Zoomed Spectrum**

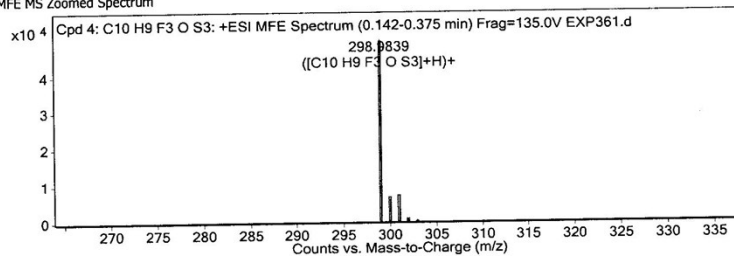

**MS Spectrum Peak List**

| m/z      | z | Abund    | Formula        | Ion    |
|----------|---|----------|----------------|--------|
| 298.9839 | 1 | 49916.02 | C10 H9 F3 O S3 | (M+H)+ |
| 299.9868 | 1 | 6201.3   | C10 H9 F3 O S3 | (M+H)+ |
| 300.9804 | 1 | 6972.59  | C10 H9 F3 O S3 | (M+H)+ |
| 301.9835 | 1 | 1003.5   | C10 H9 F3 O S3 | (M+H)+ |
| 302.9815 | 1 | 287.83   | C10 H9 F3 O S3 | (M+H)+ |

--- End Of Report ---

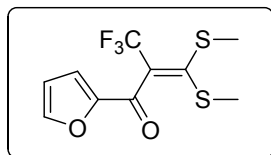

3k

<sup>1</sup>H-NMR in CDCl<sub>3</sub> (400MHz)

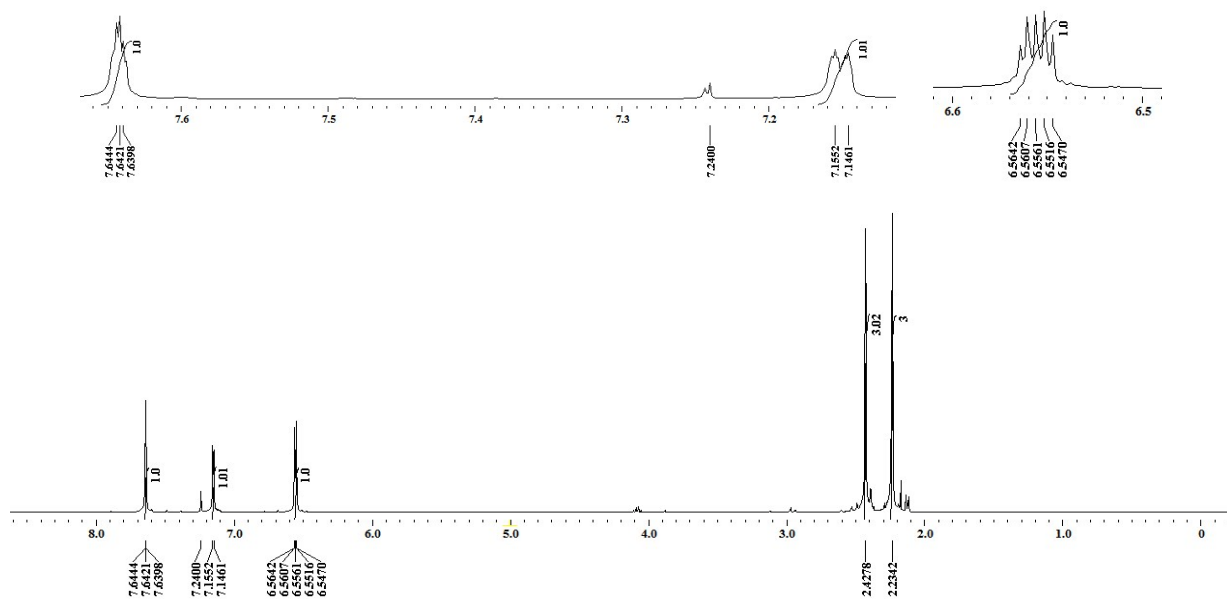

<sup>13</sup>C-NMR in CDCl<sub>3</sub> (100MHz)

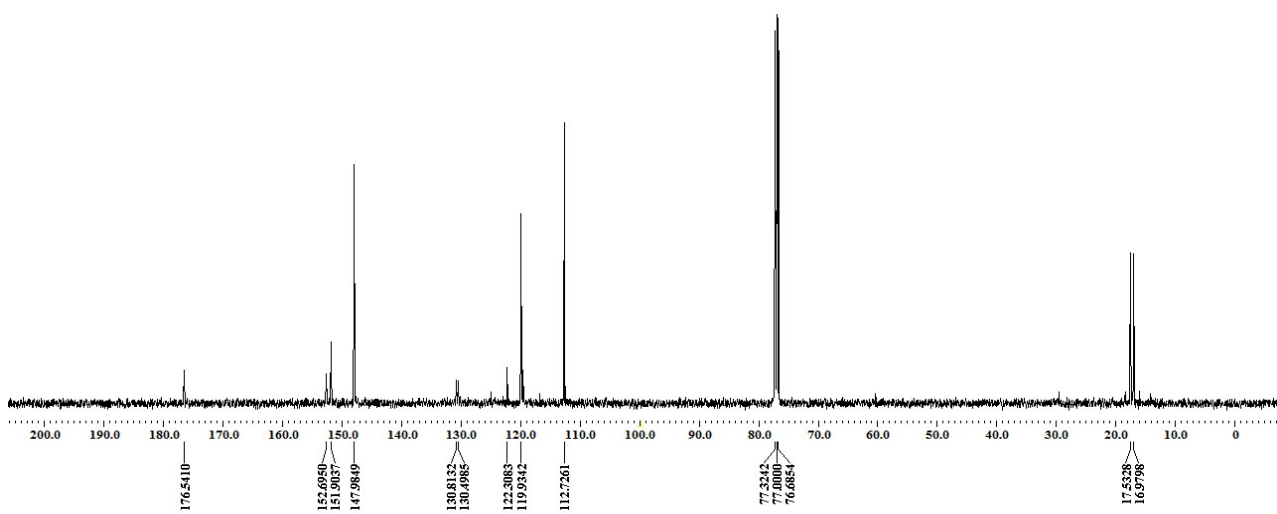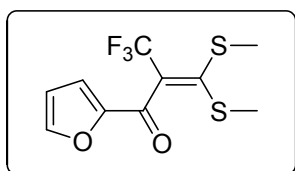

**3k**

Data File SBNS 377.d Sample Name SBNS 377  
 Sample Type Sample Position P2-B6  
 Instrument Name Instrument 1 User Name

IRM Calibration Status Success DA Method Default.m  
 Comment

Sample Group Info.  
 Acquisition SW 6200 series TOF/6500 series  
 Version Q-TOF B.05.01 (B5125)

Compound Table

| Compound Label         | RT    | Mass     | Formula         | MFG Formula     | MFG Diff (ppm) | DB Formula      |
|------------------------|-------|----------|-----------------|-----------------|----------------|-----------------|
| Cpd 5: C10 H9 F3 O2 S2 | 0.226 | 281.9999 | C10 H9 F3 O2 S2 | C10 H9 F3 O2 S2 | -1.12          | C10 H9 F3 O2 S2 |

| Compound Label         | m/z      | RT    | Algorithm                 | Mass     |
|------------------------|----------|-------|---------------------------|----------|
| Cpd 5: C10 H9 F3 O2 S2 | 283.0072 | 0.226 | Find by Molecular Feature | 281.9999 |

MFE MS Spectrum

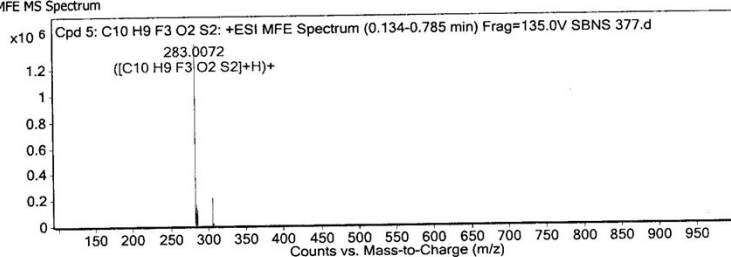

MFE MS Zoomed Spectrum

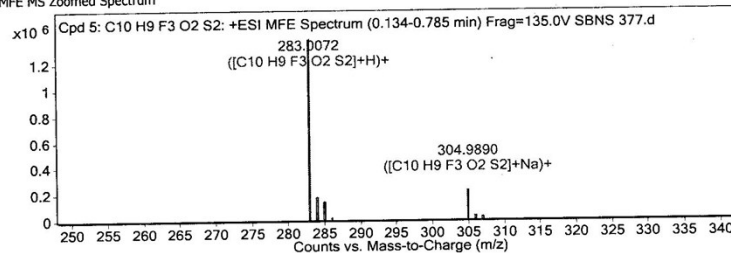

MS Spectrum Peak List

| m/z      | z | Abund      | Formula         | Ion     |
|----------|---|------------|-----------------|---------|
| 283.0072 | 1 | 1395088.25 | C10 H9 F3 O2 S2 | (M+H)+  |
| 284.0099 | 1 | 168605.67  | C10 H9 F3 O2 S2 | (M+H)+  |
| 285.004  | 1 | 132272.56  | C10 H9 F3 O2 S2 | (M+H)+  |
| 286.0064 | 1 | 14895.13   | C10 H9 F3 O2 S2 | (M+H)+  |
| 304.989  | 1 | 220674     | C10 H9 F3 O2 S2 | (M+Na)+ |
| 305.9918 | 1 | 26229.04   | C10 H9 F3 O2 S2 | (M+Na)+ |
| 306.9865 | 1 | 23123.41   | C10 H9 F3 O2 S2 | (M+Na)+ |
| 307.9901 | 1 | 2765.94    | C10 H9 F3 O2 S2 | (M+Na)+ |

--- End Of Report ---

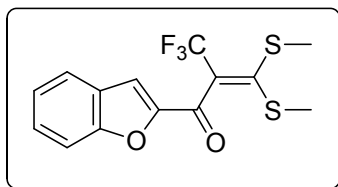

31

<sup>1</sup>H-NMR in CDCl<sub>3</sub> (400MHz)



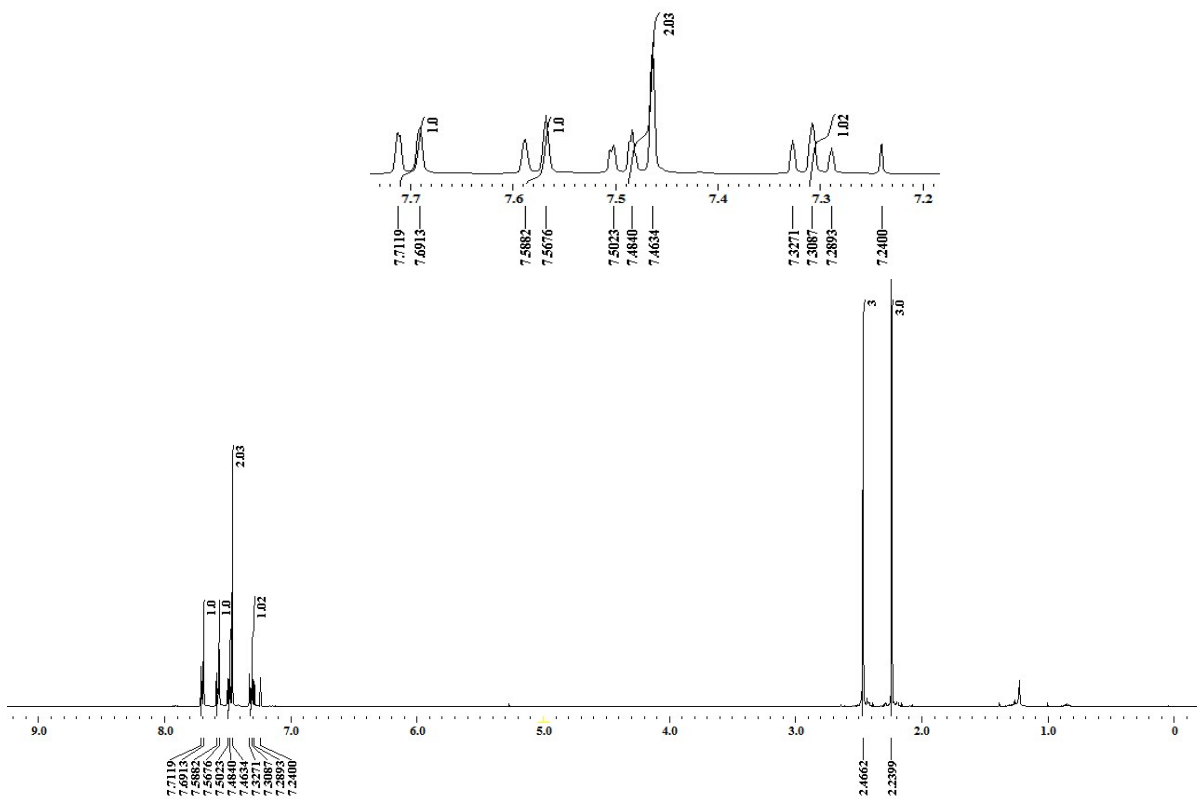

<sup>13</sup>C-NMR in CDCl<sub>3</sub> (100MHz)

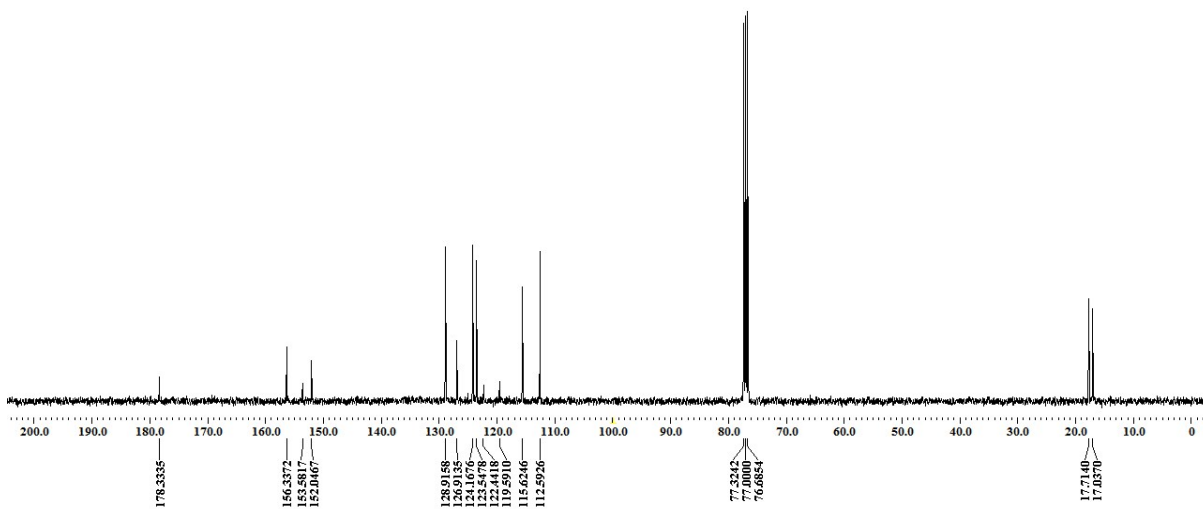

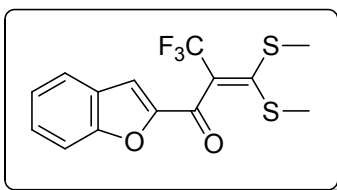

31

|               |              |             |       |                 |              |                        |         |
|---------------|--------------|-------------|-------|-----------------|--------------|------------------------|---------|
| Sample Name   | SBNS357 -2   | Position    | P2-E4 | Instrument Name | Instrument 1 | User Name              |         |
| Inj Vol       | 1            | InjPosition |       | SampleType      | Sample       | IRM Calibration Status | Success |
| Data Filename | SBNS357 -2.d |             |       | Comment         |              |                        |         |

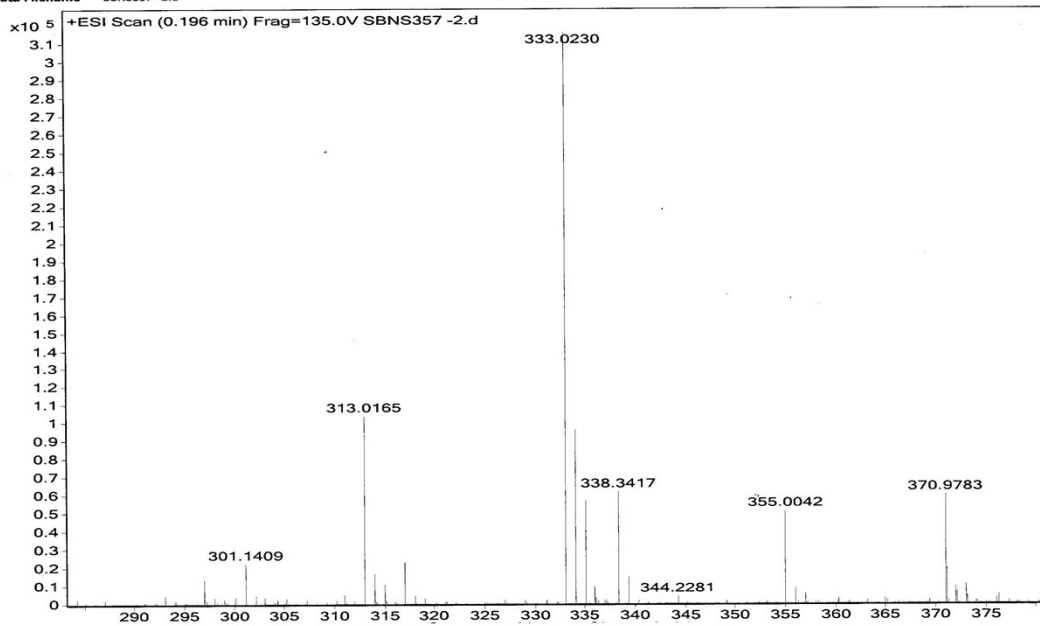

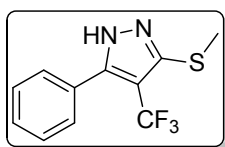

4a

<sup>1</sup>H-NMR in CDCl<sub>3</sub> (400MHz)

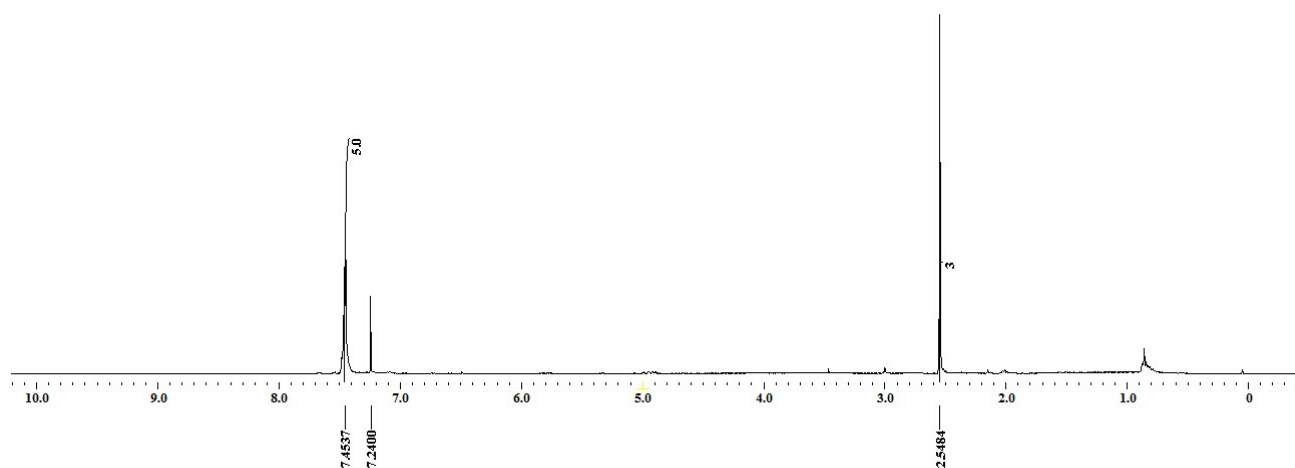

<sup>13</sup>C-NMR in CDCl<sub>3</sub> (100MHz)

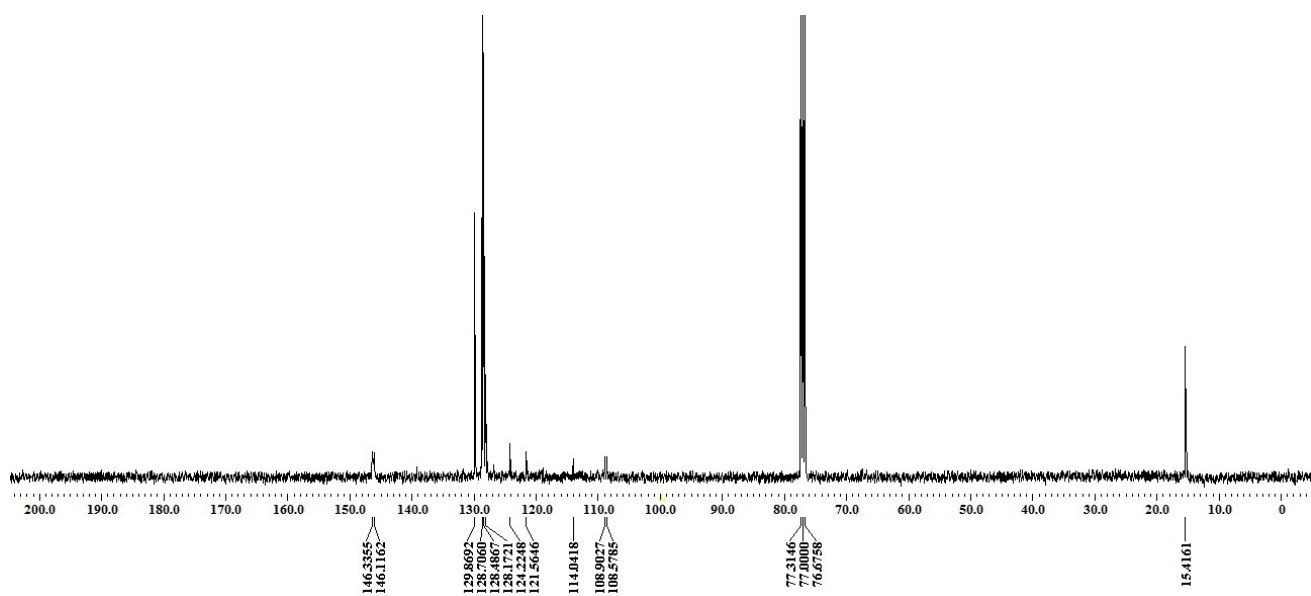

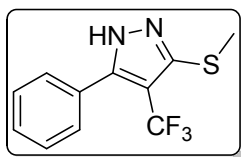

4a

Data File SB-NS-328.d Sample Name SB-NS-328  
 Sample Type Sample Position P2C8  
 Instrument Name Instrument 1 User Name lcmsdu-PC\admin

IRM Calibration Status XXXXXXXXXX DA Method Default.m  
 Comment

Sample Group Info.  
 Acquisition SW 6200 series TOF/6500 series  
 Version Q-TOF B.05.01 (B5125)

Compound Table

| Compound Label        | RT    | Mass     | Formula        | MFG Formula    | MFG Diff (ppm) | DB Formula     |
|-----------------------|-------|----------|----------------|----------------|----------------|----------------|
| Cpd 4: C11 H9 F3 N2 S | 0.204 | 258.0442 | C11 H9 F3 N2 S | C11 H9 F3 N2 S | -1.25          | C11 H9 F3 N2 S |

| Compound Label        | m/z      | RT    | Algorithm                 | Mass     |
|-----------------------|----------|-------|---------------------------|----------|
| Cpd 4: C11 H9 F3 N2 S | 259.0515 | 0.204 | Find by Molecular Feature | 258.0442 |

MFE MS Spectrum

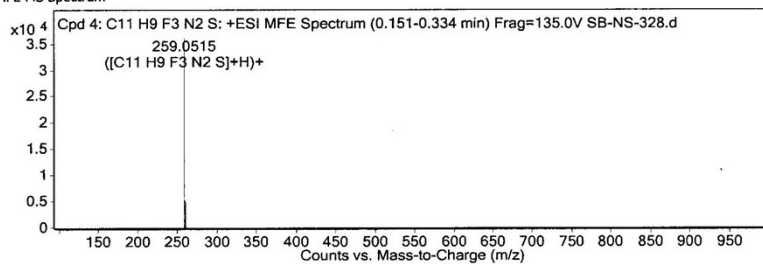

MFE MS Zoomed Spectrum

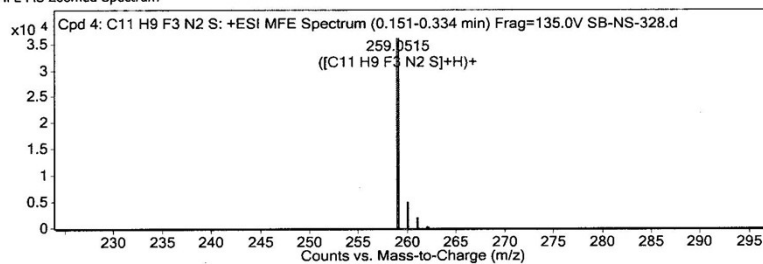

MS Spectrum Peak List

| m/z      | z | Abund    | Formula        | Ion    |
|----------|---|----------|----------------|--------|
| 259.0515 | 1 | 36040.07 | C11 H9 F3 N2 S | (M+H)+ |
| 260.0543 | 1 | 4999.66  | C11 H9 F3 N2 S | (M+H)+ |
| 261.0484 | 1 | 1928.92  | C11 H9 F3 N2 S | (M+H)+ |
| 262.0542 | 1 | 204.75   | C11 H9 F3 N2 S | (M+H)+ |

--- End Of Report ---

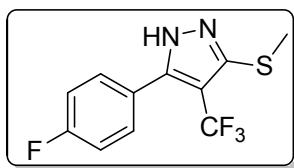

4b

<sup>1</sup>H-NMR in CDCl<sub>3</sub> (400MHz)

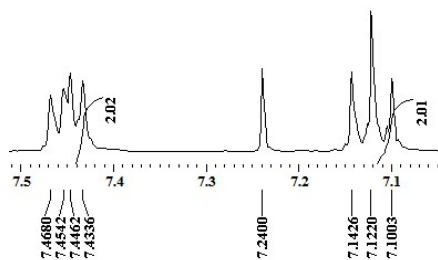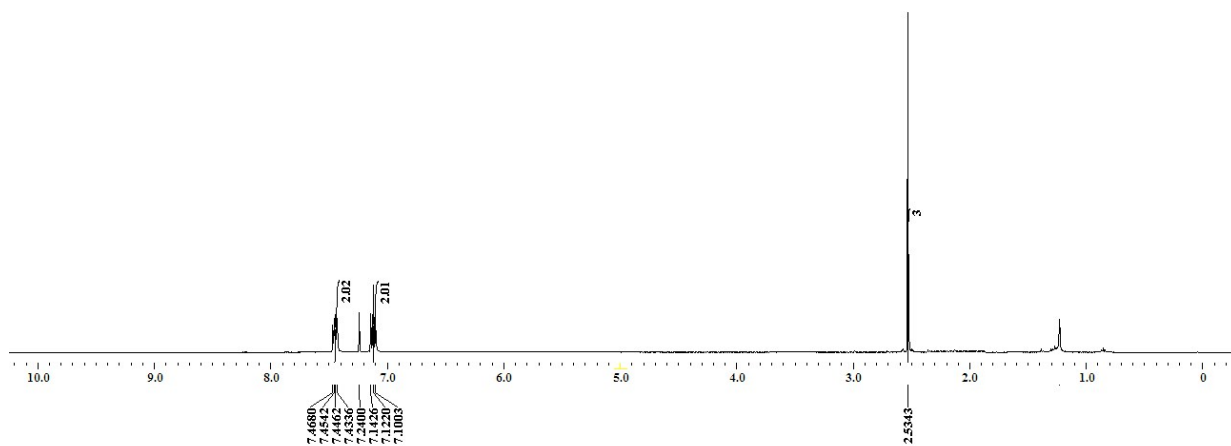

<sup>13</sup>C-NMR in CDCl<sub>3</sub> (100MHz)

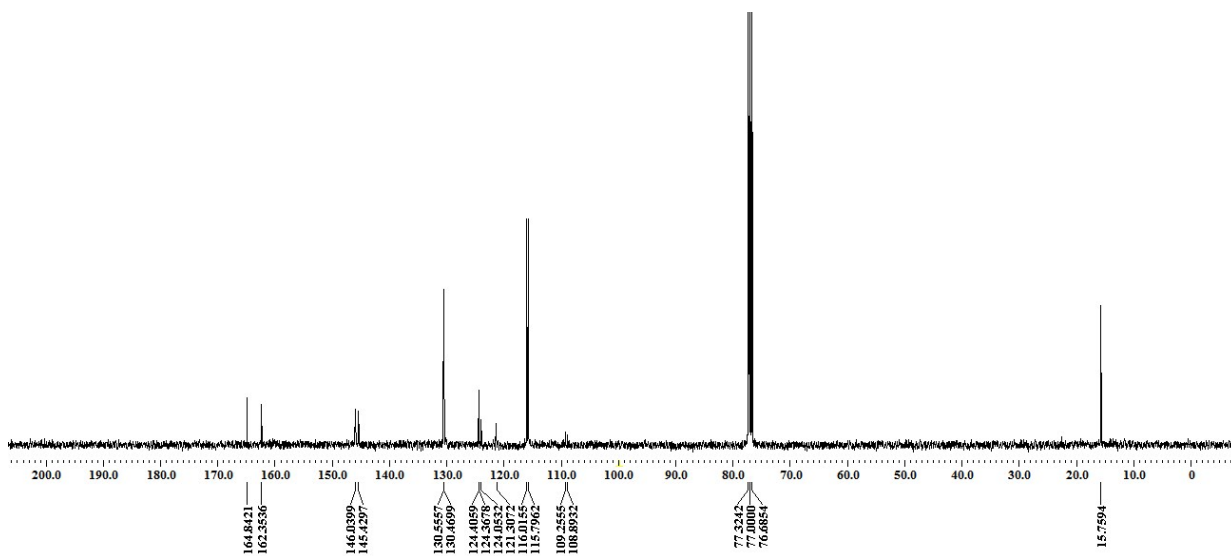

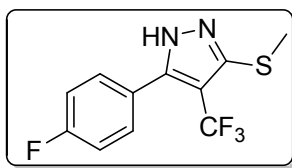

**4b**

**Data File** SB-NS-360.d **Sample Name** SB-NS-360  
**Sample Type** Sample **Position** P2C3  
**Instrument Name** Instrument 1 **User Name** lcmsdu-PC\admin

**IRM Calibration Status** Success **DA Method** Default.m  
**Comment**

**Sample Group** Info.  
**Acquisition SW** 6200 series TOF/6500 series  
**Version** Q-TOF B.05.01 (B5125)

**Compound Table**

| Compound Label        | RT    | Mass     | Formula        | MFG Formula    | MFG Diff (ppm) | DB Formula     |
|-----------------------|-------|----------|----------------|----------------|----------------|----------------|
| Cpd 2: C11 H8 F4 N2 S | 0.219 | 276.0345 | C11 H8 F4 N2 S | C11 H8 F4 N2 S | -0.31          | C11 H8 F4 N2 S |

| Compound Label        | m/z      | RT    | Algorithm                 | Mass     |
|-----------------------|----------|-------|---------------------------|----------|
| Cpd 2: C11 H8 F4 N2 S | 277.0417 | 0.219 | Find by Molecular Feature | 276.0345 |

**MFE MS Spectrum**

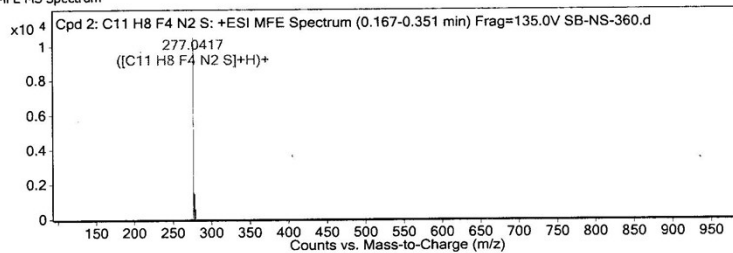

**MFE MS Zoomed Spectrum**

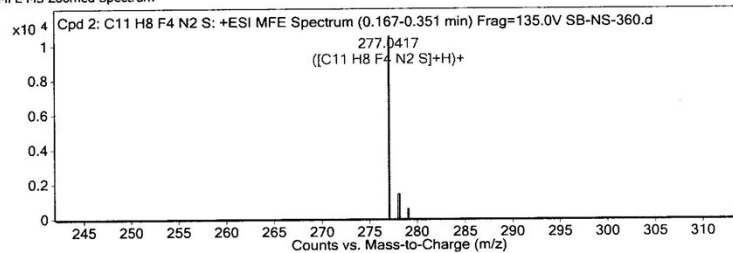

**MS Spectrum Peak List**

| m/z      | z | Abund    | Formula        | Ion    |
|----------|---|----------|----------------|--------|
| 277.0417 | 1 | 10519.26 | C11 H8 F4 N2 S | (M+H)+ |
| 278.0453 | 1 | 1480.11  | C11 H8 F4 N2 S | (M+H)+ |
| 279.0394 | 1 | 601.3    | C11 H8 F4 N2 S | (M+H)+ |

--- End Of Report ---

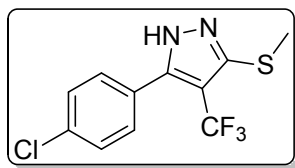

4c

<sup>1</sup>H-NMR in CDCl<sub>3</sub> (400MHz)

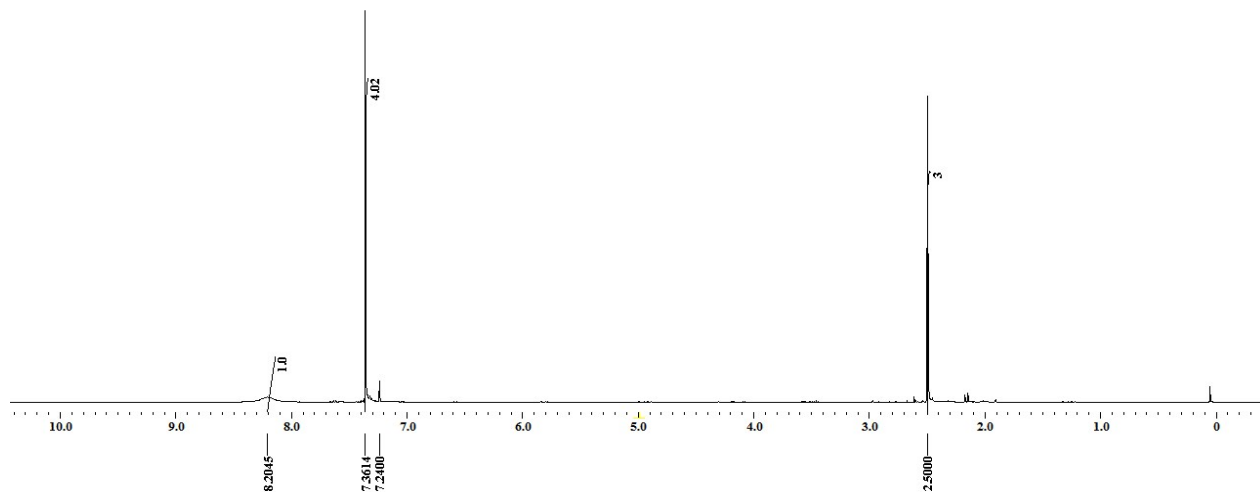

<sup>13</sup>C-NMR in CDCl<sub>3</sub> (100MHz)

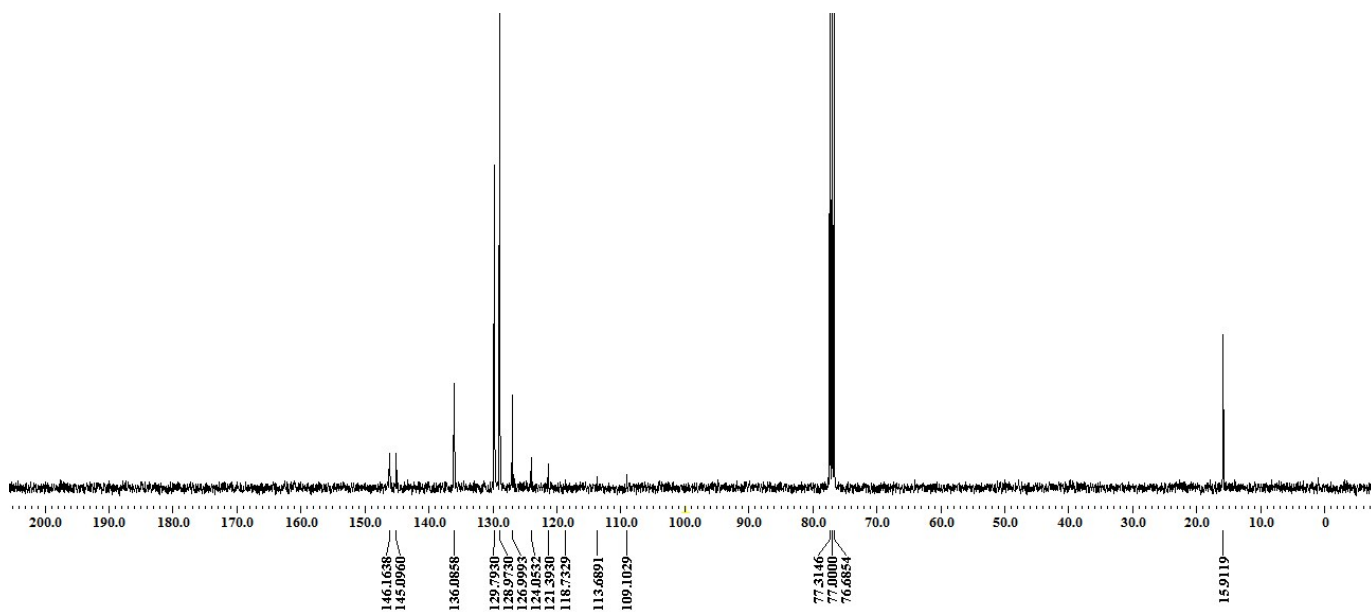

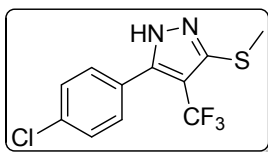

4c

Data File SBNS-372.d Sample Name SBNS-372  
 Sample Type Sample Position P2F2  
 Instrument Name Instrument 1 User Name icmsdu-PC\admin  
 IRM Calibration Status Success DA Method Default.m  
 Comment

Sample Group Info.  
 Acquisition SW 6200 series TOF/6500 series  
 Version Q-TOF B.05.01 (B5125)

Compound Table

| Compound Label           | RT    | Mass     | Formula           | MFG Formula       | MFG Diff (ppm) | DB Formula        |
|--------------------------|-------|----------|-------------------|-------------------|----------------|-------------------|
| Cpd 6: C11 H8 Cl F3 N2 S | 0.204 | 292.0055 | C11 H8 Cl F3 N2 S | C11 H8 Cl F3 N2 S | -2.14          | C11 H8 Cl F3 N2 S |

| Compound Label           | m/z      | RT    | Algorithm                 | Mass     |
|--------------------------|----------|-------|---------------------------|----------|
| Cpd 6: C11 H8 Cl F3 N2 S | 293.0126 | 0.204 | Find by Molecular Feature | 292.0055 |

MFE MS Spectrum

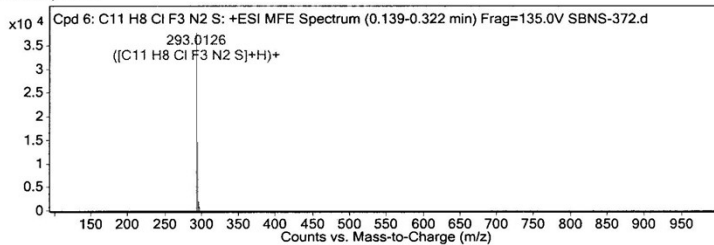

MFE MS Zoomed Spectrum

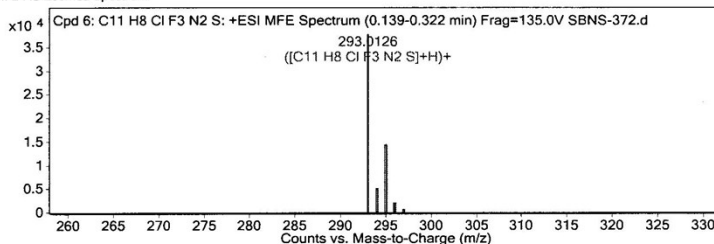

MS Spectrum Peak List

| m/z      | z | Abund    | Formula           | Ion    |
|----------|---|----------|-------------------|--------|
| 293.0126 | 1 | 37672.71 | C11 H8 Cl F3 N2 S | (M+H)+ |
| 294.0166 | 1 | 4994.9   | C11 H8 Cl F3 N2 S | (M+H)+ |
| 295.0096 | 1 | 14469.53 | C11 H8 Cl F3 N2 S | (M+H)+ |
| 296.0128 | 1 | 1875.03  | C11 H8 Cl F3 N2 S | (M+H)+ |
| 297.0116 | 1 | 729.36   | C11 H8 Cl F3 N2 S | (M+H)+ |

--- End Of Report ---



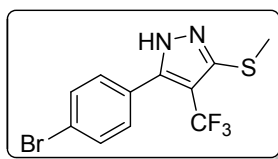

4d

$^1\text{H-NMR}$  in  $\text{CDCl}_3$  (400MHz)

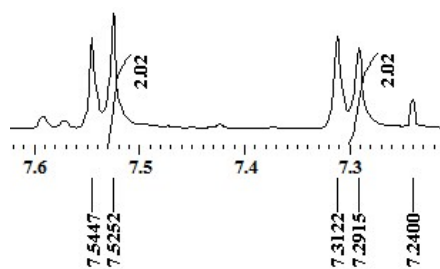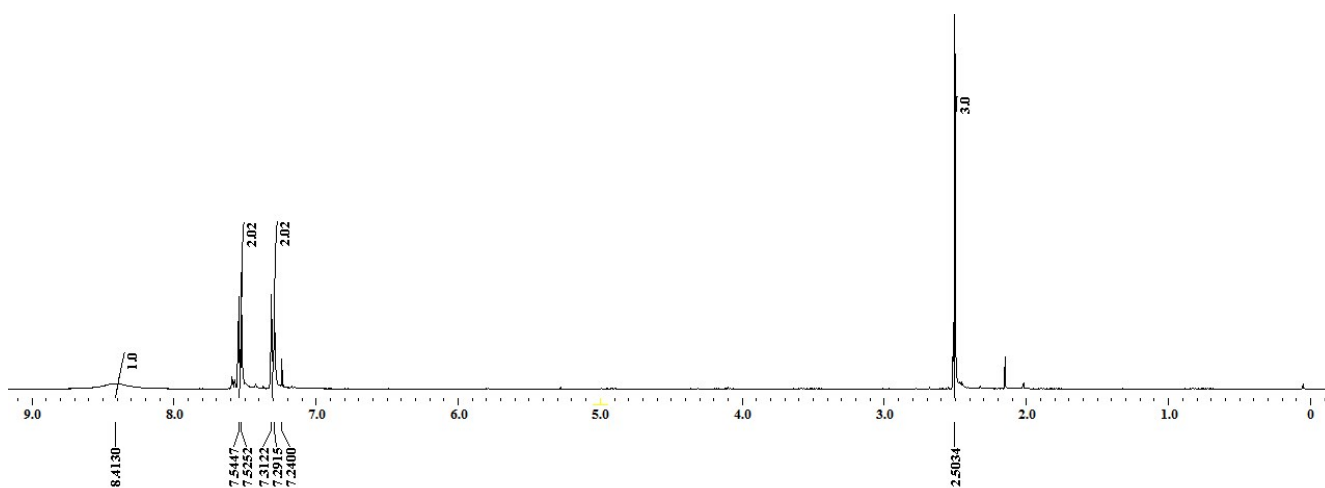

$^{13}\text{C-NMR}$  in  $\text{CDCl}_3$  (100MHz)

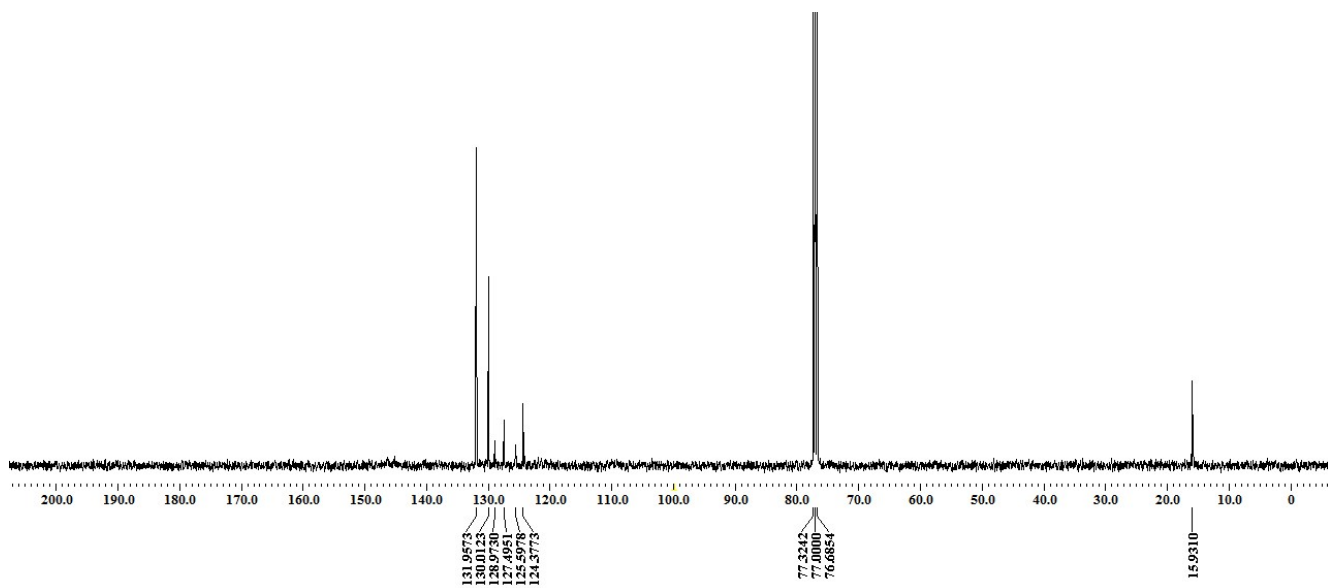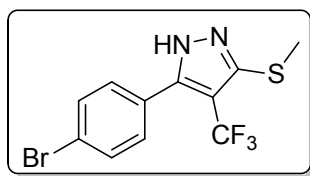

4d

|                               |              |                      |                     |
|-------------------------------|--------------|----------------------|---------------------|
| <b>Data File</b>              | SB-NS-383    | <b>Sample Name</b>   | SB-NS-409           |
| <b>Sample Type</b>            | Sample       | <b>Position</b>      | P2A3                |
| <b>Instrument Name</b>        | Instrument 1 | <b>User Name</b>     | lcmsdu-PC\admin     |
| <b>Acq Method</b>             | 29.10.2014.m | <b>Acquired Time</b> | 26-02-2015 15:20:07 |
| <b>IRM Calibration Status</b> | Success      | <b>DA Method</b>     | Default.m           |
| <b>Comment</b>                |              |                      |                     |

|                       |                             |              |
|-----------------------|-----------------------------|--------------|
| <b>Sample Group</b>   |                             | <b>Info.</b> |
| <b>Acquisition SW</b> | 6200 series TOF/6500 series |              |
| <b>Version</b>        | Q-TOF B.05.01 (B5125)       |              |

#### Compound Table

| Compound Label           | RT    | Mass     | Formula           | MFG Formula       | MFG Diff (ppm) | DB Formula        |
|--------------------------|-------|----------|-------------------|-------------------|----------------|-------------------|
| Cpd 6: C11 H8 Br F3 N2 S | 0.207 | 335.9547 | C11 H8 Br F3 N2 S | C11 H8 Br F3 N2 S | -0.92          | C11 H8 Br F3 N2 S |

| Compound Label           | m/z      | RT    | Algorithm                 | Mass     |
|--------------------------|----------|-------|---------------------------|----------|
| Cpd 6: C11 H8 Br F3 N2 S | 336.9621 | 0.207 | Find by Molecular Feature | 335.9547 |

#### MFE MS Spectrum

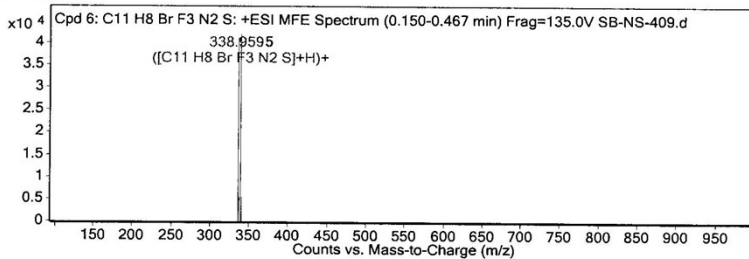

#### MFE MS Zoomed Spectrum

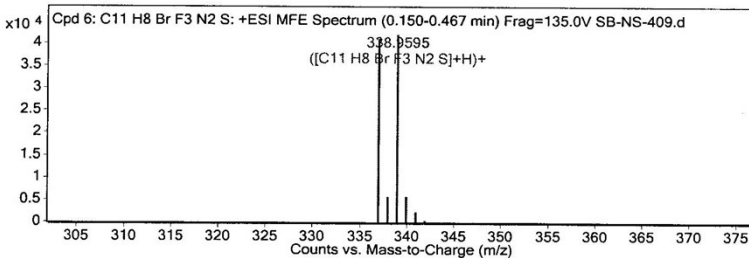

#### MS Spectrum Peak List

| m/z      | z | Abund    | Formula           | Ion    |
|----------|---|----------|-------------------|--------|
| 336.9620 | 1 | 41064.77 | C11 H8 Br F3 N2 S | (M+H)+ |
| 337.9652 | 1 | 5446.67  | C11 H8 Br F3 N2 S | (M+H)+ |
| 338.9595 | 1 | 41900.1  | C11 H8 Br F3 N2 S | (M+H)+ |
| 339.9625 | 1 | 5446.27  | C11 H8 Br F3 N2 S | (M+H)+ |
| 340.9577 | 1 | 2330.67  | C11 H8 Br F3 N2 S | (M+H)+ |
| 341.9549 | 1 | 188.9    | C11 H8 Br F3 N2 S | (M+H)+ |

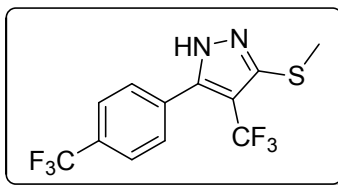

4e

<sup>1</sup>H-NMR in CDCl<sub>3</sub> (400MHz)

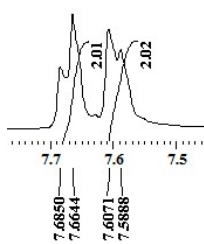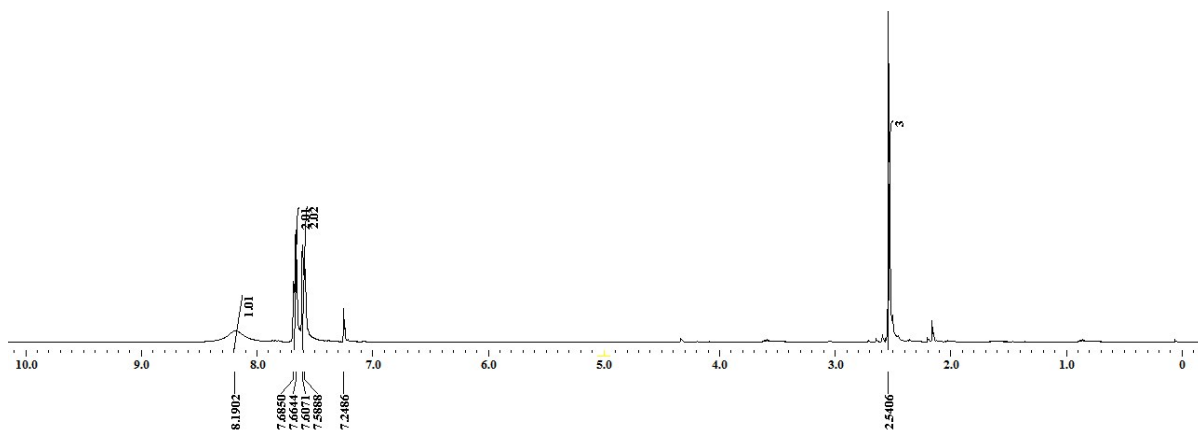

**<sup>13</sup>C-NMR in CDCl<sub>3</sub> (100MHz)**

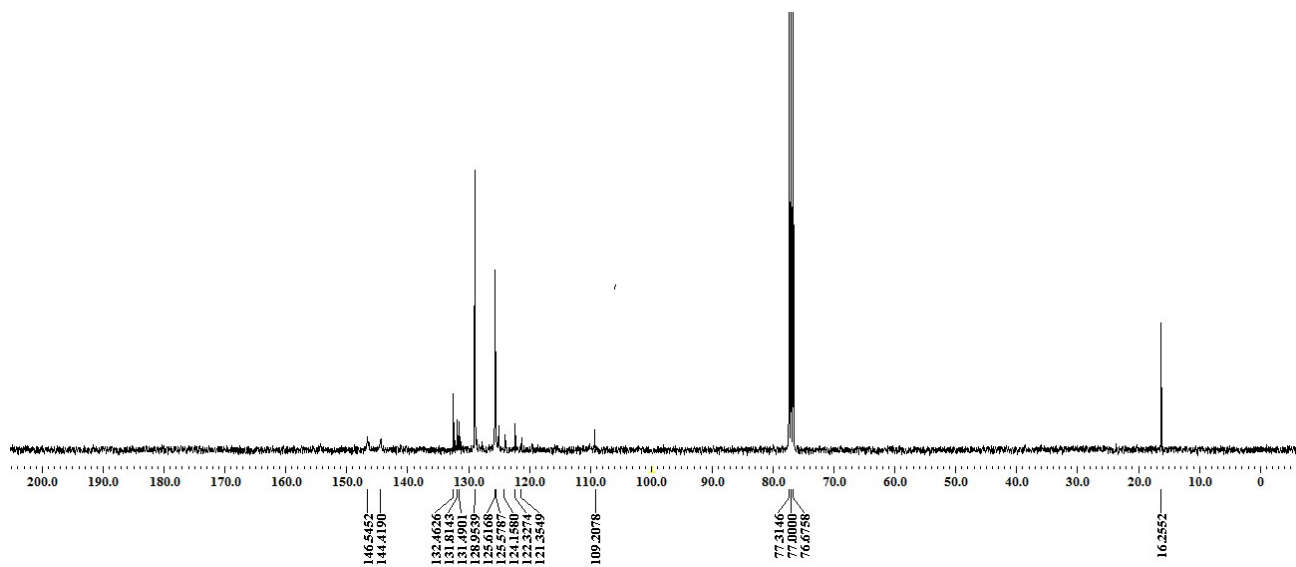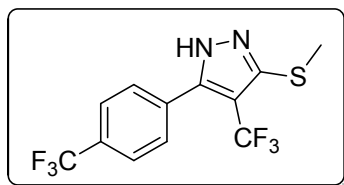

4e

|                               |              |                      |                     |
|-------------------------------|--------------|----------------------|---------------------|
| <b>Data File</b>              | SB-NS-386.d  | <b>Sample Name</b>   | SB-NS-386           |
| <b>Sample Type</b>            | Sample       | <b>Position</b>      | P1-A9               |
| <b>Instrument Name</b>        | Instrument 1 | <b>User Name</b>     |                     |
| <b>Acq Method</b>             | 29.10.2014.m | <b>Acquired Time</b> | 06-06-2016 15:03:31 |
| <b>IRM Calibration Status</b> | Success      | <b>DA Method</b>     | Default.m           |
| <b>Comment</b>                |              |                      |                     |

|                       |                             |              |
|-----------------------|-----------------------------|--------------|
| <b>Sample Group</b>   |                             | <b>Info.</b> |
| <b>Acquisition SW</b> | 6200 series TOF/6500 series |              |
| <b>Version</b>        | Q-TOF B.05.01 (B5125)       |              |

#### Compound Table

| Compound Label        | RT | Mass     | Formula        | MFG Formula    | MFG Diff (ppm) | DB Formula     |
|-----------------------|----|----------|----------------|----------------|----------------|----------------|
| Cpd 1: C12 H8 F6 N2 S | 11 | 326.0312 | C12 H8 F6 N2 S | C12 H8 F6 N2 S | 0.16           | C12 H8 F6 N2 S |

| Compound Label        | m/z      | RT | Algorithm                 | Mass     |
|-----------------------|----------|----|---------------------------|----------|
| Cpd 1: C12 H8 F6 N2 S | 327.0385 | 11 | Find by Molecular Feature | 326.0312 |

#### MFE MS Spectrum

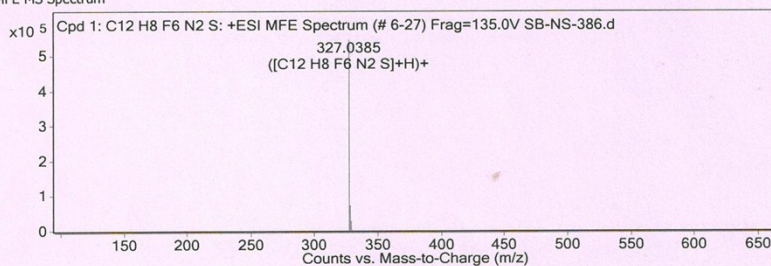

#### MFE MS Zoomed Spectrum

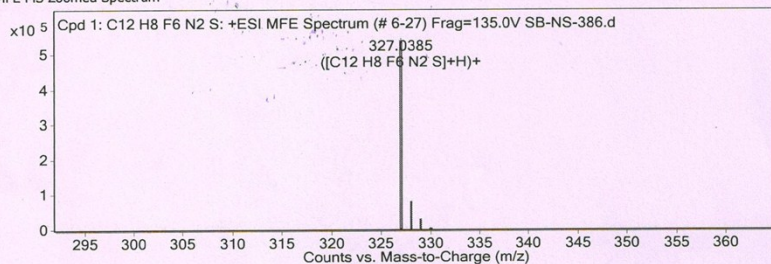

#### MS Spectrum Peak List

| m/z      | z | Abund     | Formula        | Ion    |
|----------|---|-----------|----------------|--------|
| 327.0385 | 1 | 546059.94 | C12 H8 F6 N2 S | (M+H)+ |
| 328.0412 | 1 | 73402.99  | C12 H8 F6 N2 S | (M+H)+ |
| 329.0355 | 1 | 26823.88  | C12 H8 F6 N2 S | (M+H)+ |
| 330.0383 | 1 | 3189.78   | C12 H8 F6 N2 S | (M+H)+ |

--- End Of Report ---

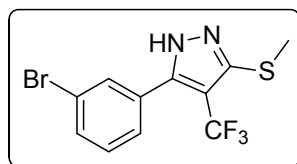

4f

<sup>1</sup>H-NMR in CDCl<sub>3</sub> (400MHz)

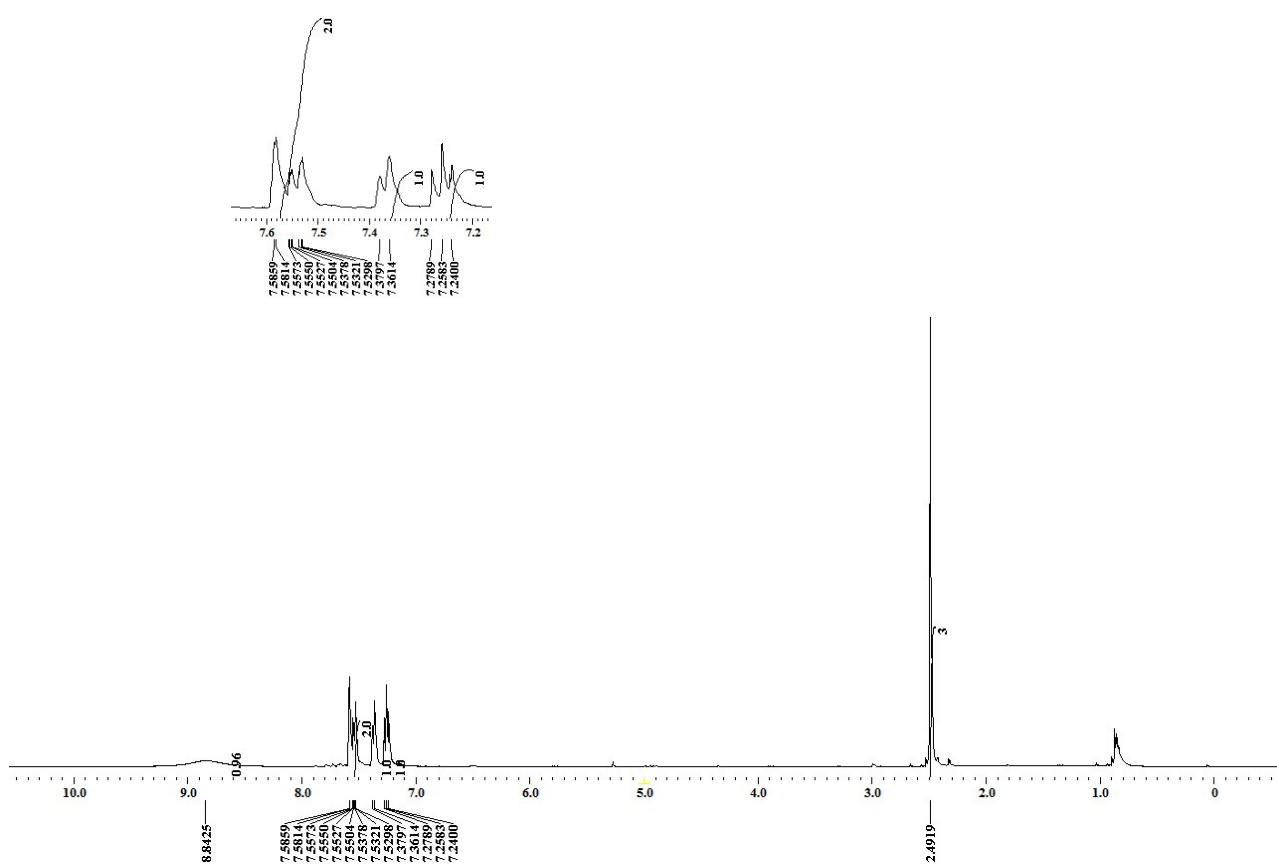

**<sup>13</sup>C-NMR in CDCl<sub>3</sub> (100MHz)**

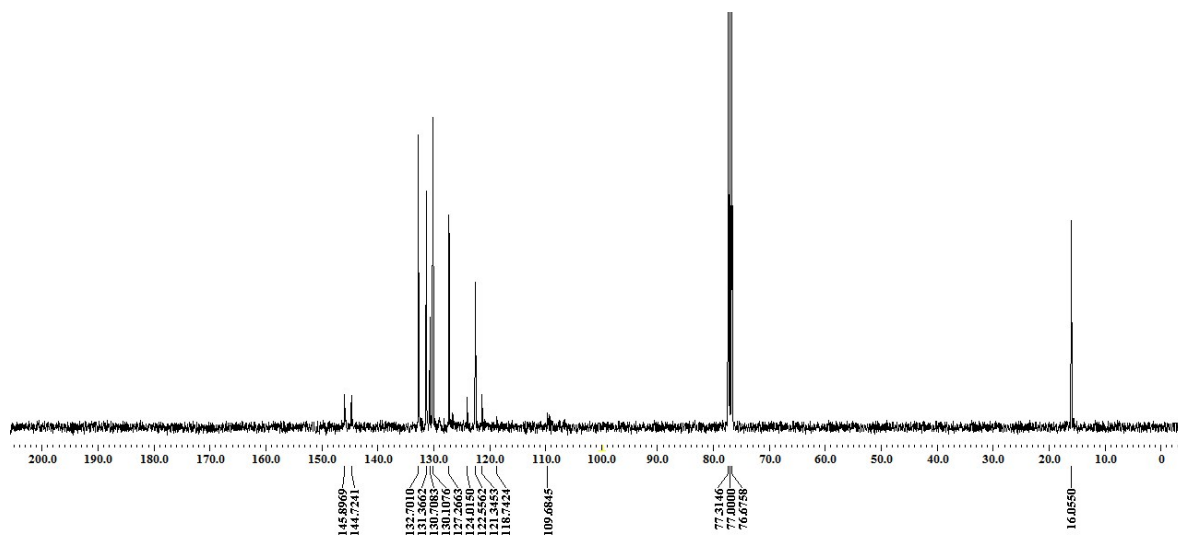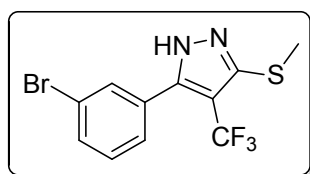

## 4f

**Data File** SB-NS-409.d **Sample Name** SB-NS-409  
**Sample Type** Sample **Position** P2A3  
**Instrument Name** Instrument 1 **User Name** lcmsdu-PC\admin  
**IRM Calibration Status** XXXXXXXXXX **DA Method** Default.m  
**Comment**  
**Sample Group** **Info.**  
**Acquisition SW** 6200 series TOF/6500 series  
**Version** Q-TOF B.05.01 (B5125)

## Compound Table

| Compound Label           | RT    | Mass     | Formula           | MFG Formula       | MFG Diff (ppm) | DB Formula        |
|--------------------------|-------|----------|-------------------|-------------------|----------------|-------------------|
| Cpd 6: C11 H8 Br F3 N2 S | 0.207 | 335.9547 | C11 H8 Br F3 N2 S | C11 H8 Br F3 N2 S | -0.92          | C11 H8 Br F3 N2 S |

| Compound Label           | m/z      | RT    | Algorithm                 | Mass     |
|--------------------------|----------|-------|---------------------------|----------|
| Cpd 6: C11 H8 Br F3 N2 S | 336.9621 | 0.207 | Find by Molecular Feature | 335.9547 |

## MFE MS Spectrum

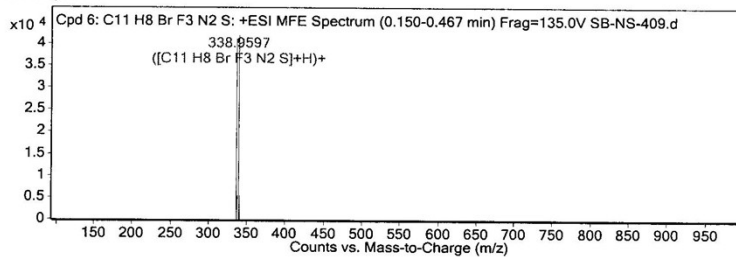

## MFE MS Zoomed Spectrum

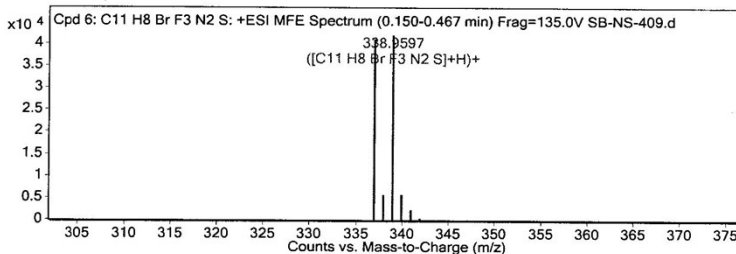

## MS Spectrum Peak List

| m/z      | z | Abund    | Formula           | Ion    |
|----------|---|----------|-------------------|--------|
| 336.9621 | 1 | 41064.77 | C11 H8 Br F3 N2 S | (M+H)+ |
| 337.9652 | 1 | 5446.67  | C11 H8 Br F3 N2 S | (M+H)+ |
| 338.9597 | 1 | 41900.1  | C11 H8 Br F3 N2 S | (M+H)+ |
| 339.9625 | 1 | 5446.27  | C11 H8 Br F3 N2 S | (M+H)+ |
| 340.9577 | 1 | 2330.67  | C11 H8 Br F3 N2 S | (M+H)+ |
| 341.9549 | 1 | 188.9    | C11 H8 Br F3 N2 S | (M+H)+ |

--- End Of Report ---

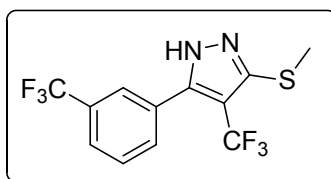

4g

<sup>1</sup>H-NMR in CDCl<sub>3</sub> (400MHz)

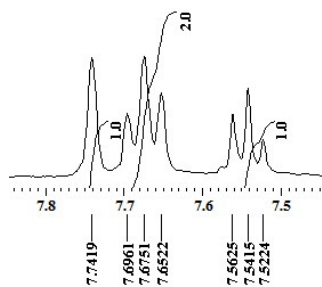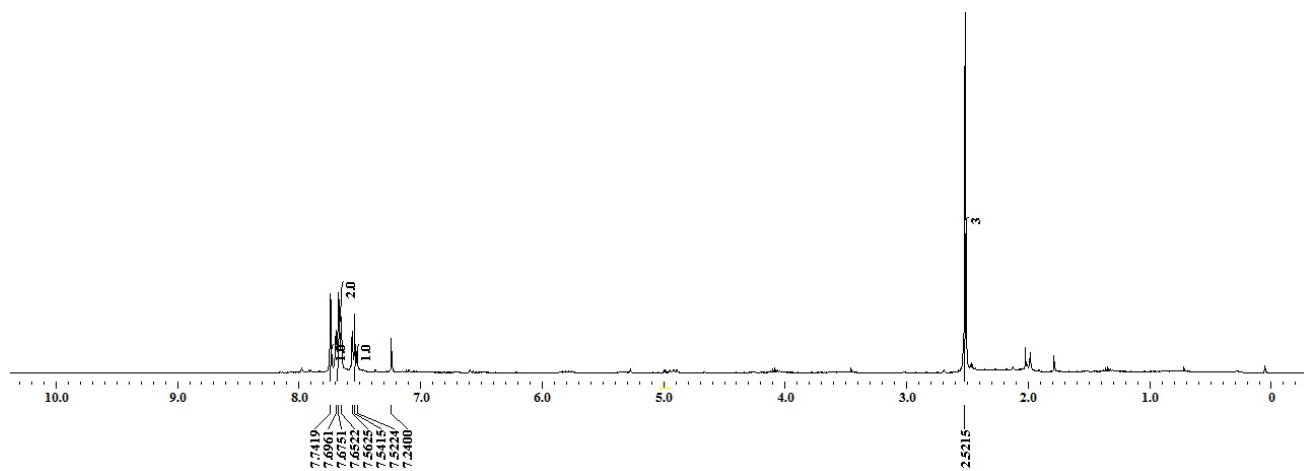

<sup>13</sup>C-NMR in CDCl<sub>3</sub> (100MHz)

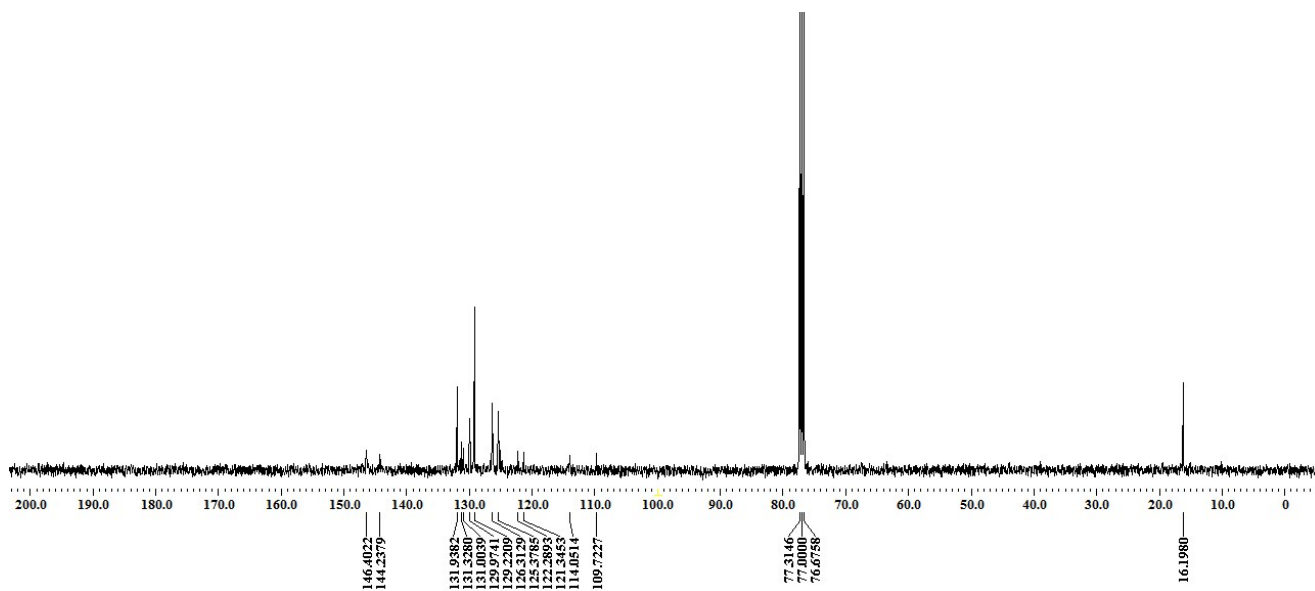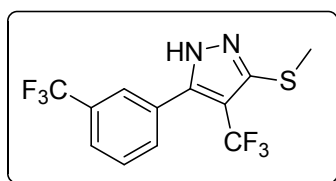



4g

Data File SB-NS-416.d Sample Name SB-NS-416  
 Sample Type Sample Position P1-A9  
 Instrument Name Instrument 1 User Name  
 Acq Method 29.10.2014.m Acquired Time 06-06-2016 15:06:14  
 IRM Calibration Status Success DA Method Default.m  
 Comment

Sample Group Info.  
 Acquisition SW 6200 series TOF/6500 series  
 Version Q-TOF B.05.01 (B5125)

Compound Table

| Compound Label        | RT | Mass     | Formula        | MFG Formula    | MFG Diff (ppm) | DB Formula     |
|-----------------------|----|----------|----------------|----------------|----------------|----------------|
| Cpd 1: C12 H8 F6 N2 S | 11 | 326.0308 | C12 H8 F6 N2 S | C12 H8 F6 N2 S | 1.22           | C12 H8 F6 N2 S |

| Compound Label        | m/z      | RT | Algorithm                 | Mass     |
|-----------------------|----------|----|---------------------------|----------|
| Cpd 1: C12 H8 F6 N2 S | 327.0382 | 11 | Find by Molecular Feature | 326.0308 |

MFE MS Spectrum

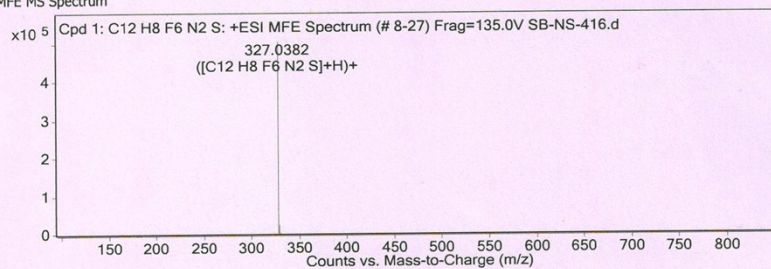

MFE MS Zoomed Spectrum

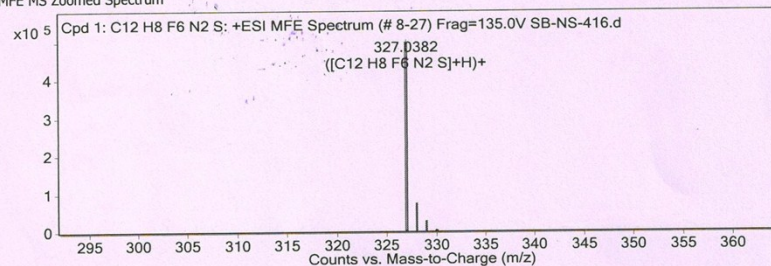

MS Spectrum Peak List

| m/z      | z | Abund     | Formula        | Ion    |
|----------|---|-----------|----------------|--------|
| 327.0382 | 1 | 504488.09 | C12 H8 F6 N2 S | (M+H)+ |
| 328.0408 | 1 | 68466.58  | C12 H8 F6 N2 S | (M+H)+ |
| 329.0354 | 1 | 24271.75  | C12 H8 F6 N2 S | (M+H)+ |
| 330.0367 | 1 | 3050.17   | C12 H8 F6 N2 S | (M+H)+ |

--- End Of Report ---

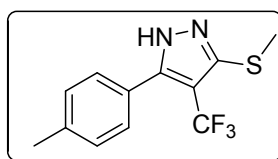

4h

<sup>1</sup>H-NMR in CDCl<sub>3</sub> (400MHz)

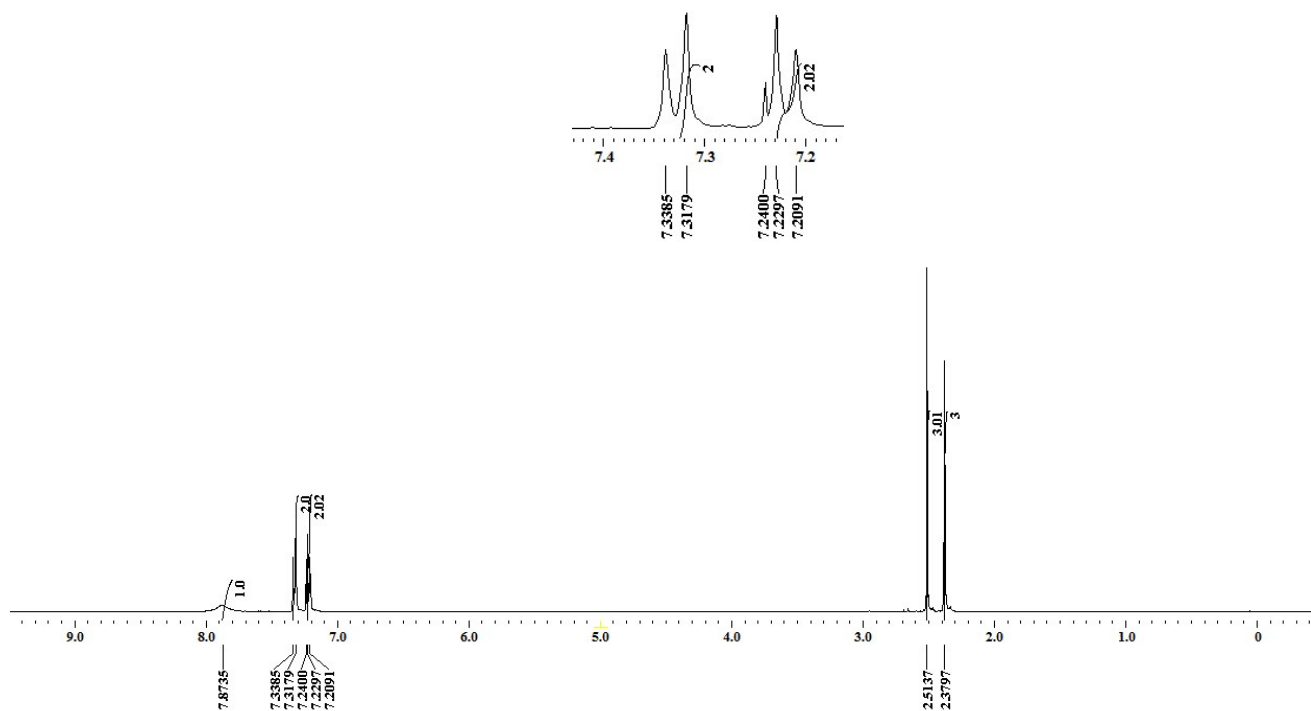

<sup>13</sup>C-NMR in CDCl<sub>3</sub> (100MHz)

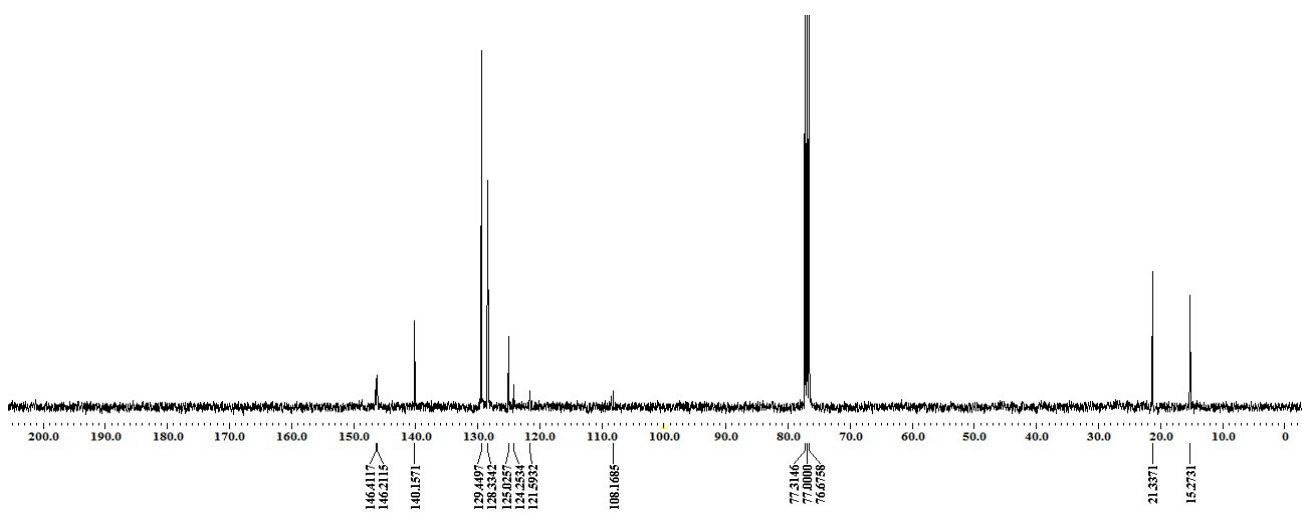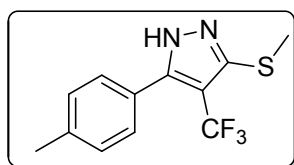

4h

**Data File** SB-NS-362.d      **Sample Name** SB-NS-362  
**Sample Type** Sample      **Position** P2D7  
**Instrument Name** Instrument 1      **User Name** lcmsdu-PC\admin

**IRM Calibration Status** Success      **DA Method** Default.m  
**Comment**

**Sample Group**      **Info.**  
**Acquisition SW** 6200 series TOF/6500 series  
**Version** Q-TOF B.05.01 (B5125)

**Compound Table**

| Compound Label         | RT    | Mass     | Formula         | MFG Formula     | MFG Diff (ppm) | DB Formula      |
|------------------------|-------|----------|-----------------|-----------------|----------------|-----------------|
| Cpd 1: C12 H11 F3 N2 S | 0.203 | 272.0592 | C12 H11 F3 N2 S | C12 H11 F3 N2 S | 1.18           | C12 H11 F3 N2 S |

| Compound Label         | m/z      | RT    | Algorithm                 | Mass     |
|------------------------|----------|-------|---------------------------|----------|
| Cpd 1: C12 H11 F3 N2 S | 273.0664 | 0.203 | Find by Molecular Feature | 272.0592 |

MFE MS Spectrum

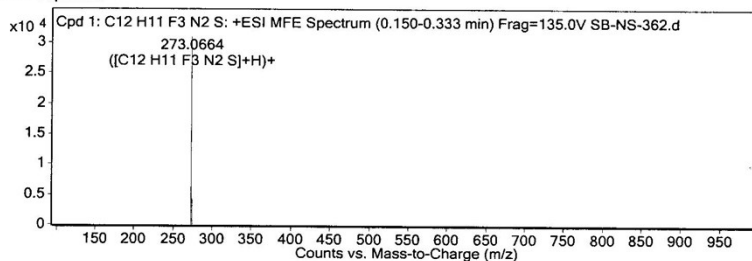

MFE MS Zoomed Spectrum

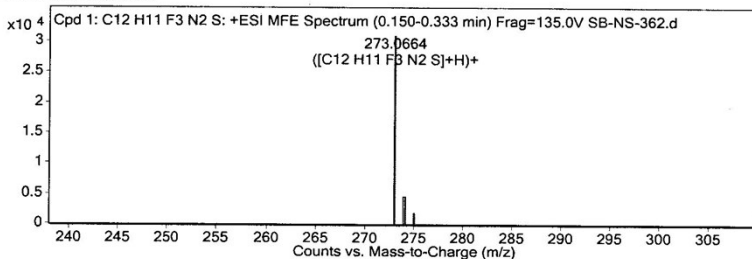

MS Spectrum Peak List

| m/z      | z | Abund    | Formula         | Ion    |
|----------|---|----------|-----------------|--------|
| 273.0664 | 1 | 30955.35 | C12 H11 F3 N2 S | (M+H)+ |
| 274.0699 | 1 | 4273.48  | C12 H11 F3 N2 S | (M+H)+ |
| 275.0642 | 1 | 1961.88  | C12 H11 F3 N2 S | (M+H)+ |

--- End Of Report ---

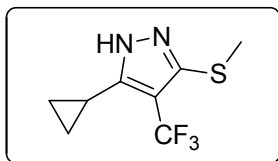

4i

<sup>1</sup>H-NMR in CDCl<sub>3</sub> (400MHz)

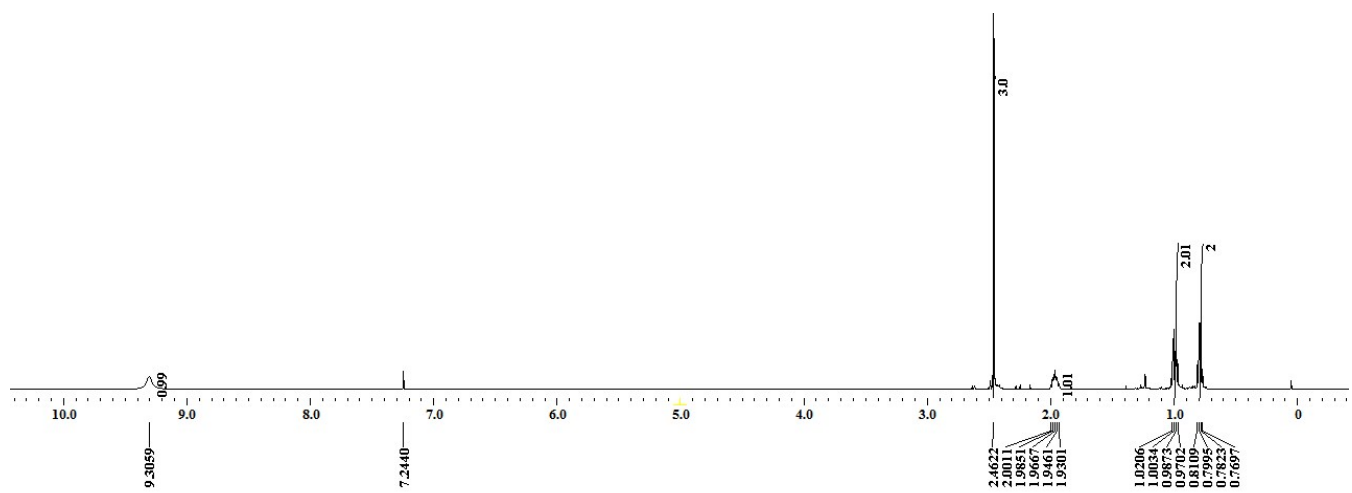

**<sup>13</sup>C-NMR in CDCl<sub>3</sub> (100MHz)**

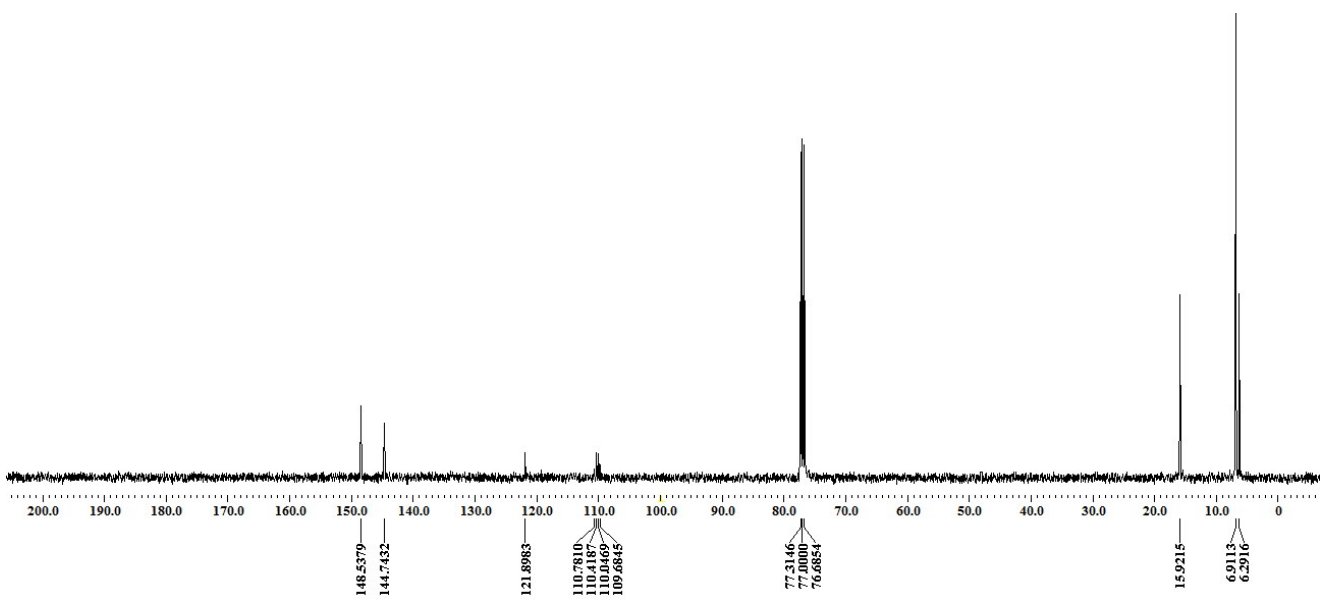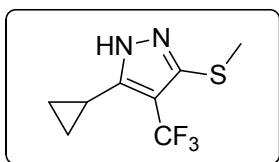

**4i**

**Data File** SB NS 371.d **Sample Name** SB NS 371  
**Sample Type** Sample **Position** P2E9  
**Instrument Name** Instrument 1 **User Name** lcmsdu-PC\admin  
**IRM Calibration Status** SUCCESS **DA Method** Default.m  
**Comment**

**Sample Group** Info.  
**Acquisition SW** 6200 series TOF/6500 series  
**Version** Q-TOF B.05.01 (B5125)

#### Compound Table

| Compound Label       | RT    | Mass     | Formula       | MFG Formula   | MFG Diff (ppm) | DB Formula    |
|----------------------|-------|----------|---------------|---------------|----------------|---------------|
| Cpd 7: C8 H9 F3 N2 S | 0.219 | 222.0449 | C8 H9 F3 N2 S | C8 H9 F3 N2 S | -4.82          | C8 H9 F3 N2 S |

| Compound Label       | m/z      | RT    | Algorithm                 | Mass     |
|----------------------|----------|-------|---------------------------|----------|
| Cpd 7: C8 H9 F3 N2 S | 223.0521 | 0.219 | Find by Molecular Feature | 222.0449 |

#### MFE MS Spectrum

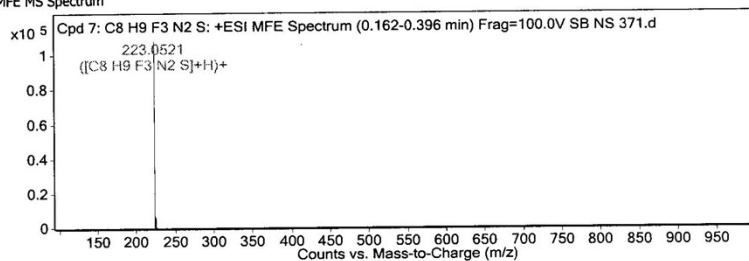

#### MFE MS Zoomed Spectrum

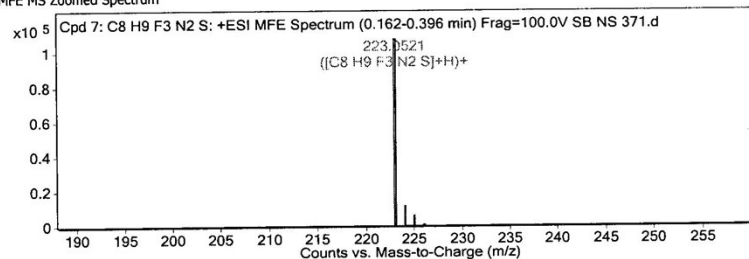

#### MS Spectrum Peak List

| m/z      | z | Abund     | Formula       | Ion    |
|----------|---|-----------|---------------|--------|
| 223.0521 | 1 | 107913.52 | C8 H9 F3 N2 S | (M+H)+ |
| 224.0553 | 1 | 11598.36  | C8 H9 F3 N2 S | (M+H)+ |
| 225.0498 | 1 | 5874.66   | C8 H9 F3 N2 S | (M+H)+ |
| 226.0537 | 1 | 636.85    | C8 H9 F3 N2 S | (M+H)+ |

--- End Of Report ---

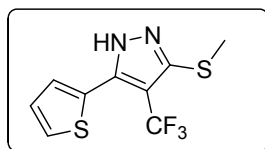

4j

<sup>1</sup>H-NMR in CDCl<sub>3</sub> (400MHz)

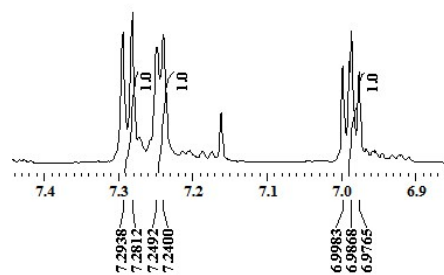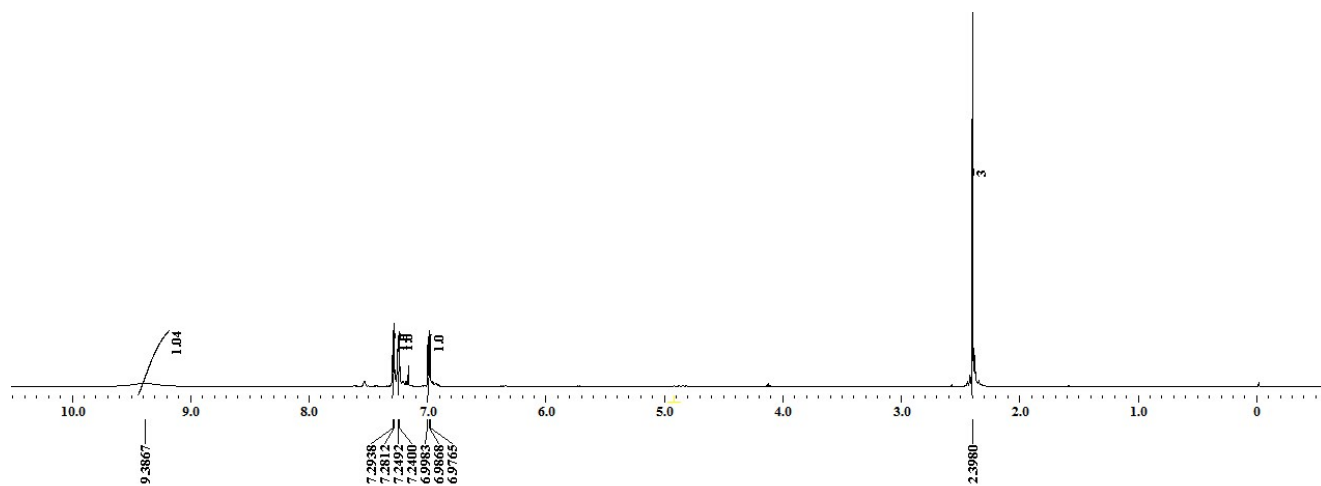

<sup>13</sup>C-NMR in CDCl<sub>3</sub> (100MHz)

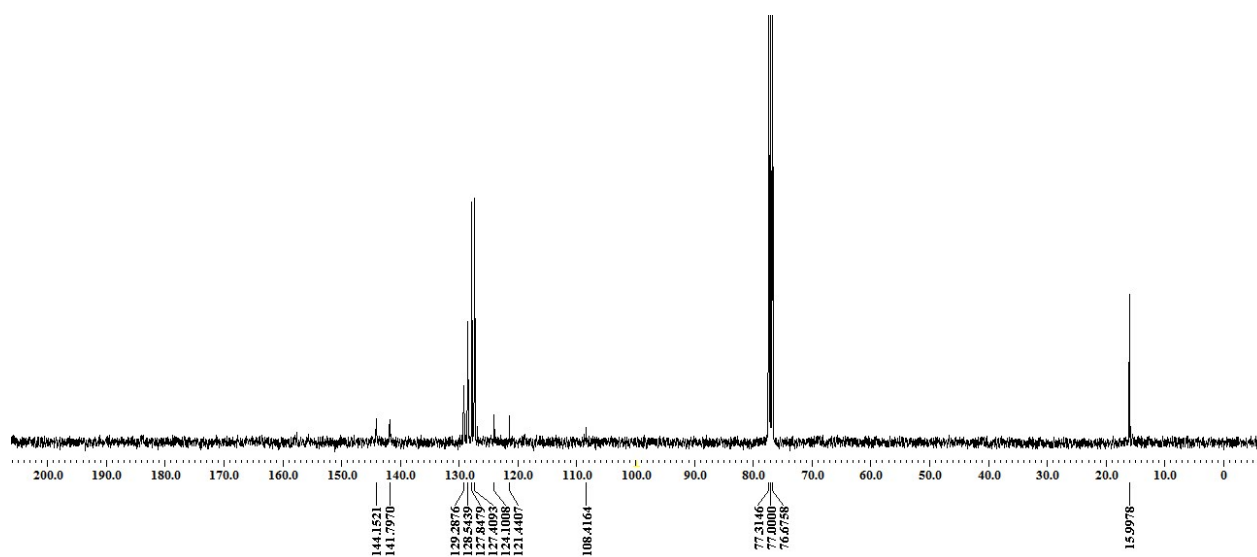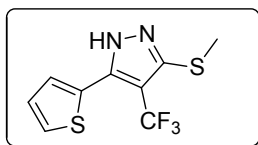

4j

**Data File** SB-NS370.d **Sample Name** SB-NS370  
**Sample Type** Sample **Position** P1B6  
**Instrument Name** Instrument 1 **User Name** lcmsdu-PC\admin  
**IRM Calibration Status** Success **DA Method** Default.m  
**Comment**

**Sample Group** **Info.**  
**Acquisition SW** 6200 series TOF/6500 series  
**Version** Q-TOF B.05.01 (B5125)

## Compound Table

| Compound Label        | RT    | Mass    | Formula        | MFG Formula    | MFG Diff (ppm) | DB Formula     |
|-----------------------|-------|---------|----------------|----------------|----------------|----------------|
| Cpd 7: C9 H7 F3 N2 S2 | 0.205 | 264.001 | C9 H7 F3 N2 S2 | C9 H7 F3 N2 S2 | -2.91          | C9 H7 F3 N2 S2 |

| Compound Label        | m/z      | RT    | Algorithm                 | Mass    |
|-----------------------|----------|-------|---------------------------|---------|
| Cpd 7: C9 H7 F3 N2 S2 | 265.0082 | 0.205 | Find by Molecular Feature | 264.001 |

## MFE MS Spectrum

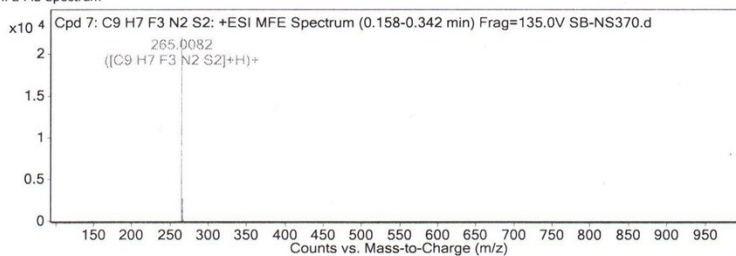

## MFE MS Zoomed Spectrum

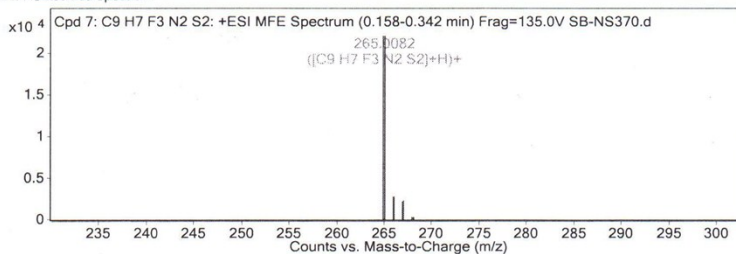

## MS Spectrum Peak List

| m/z      | z | Abund    | Formula        | Ion    |
|----------|---|----------|----------------|--------|
| 265.0082 | 1 | 22043.51 | C9 H7 F3 N2 S2 | (M+H)+ |
| 266.0107 | 1 | 2720.37  | C9 H7 F3 N2 S2 | (M+H)+ |
| 267.0055 | 1 | 2392.42  | C9 H7 F3 N2 S2 | (M+H)+ |
| 268.0078 | 1 | 207.89   | C9 H7 F3 N2 S2 | (M+H)+ |

--- End Of Report ---

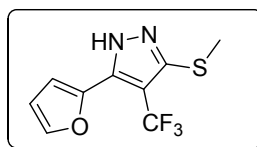

4k

<sup>1</sup>H-NMR in CDCl<sub>3</sub> (400MHz)

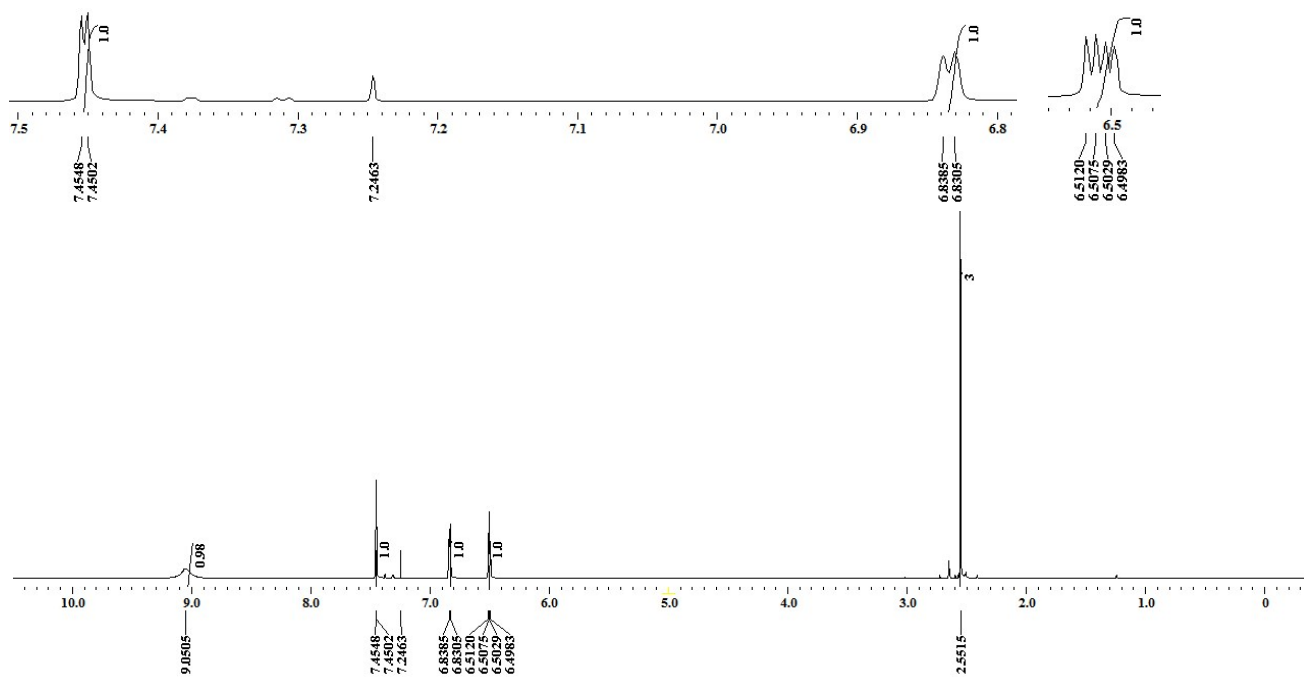

<sup>13</sup>C-NMR in CDCl<sub>3</sub> (100MHz)

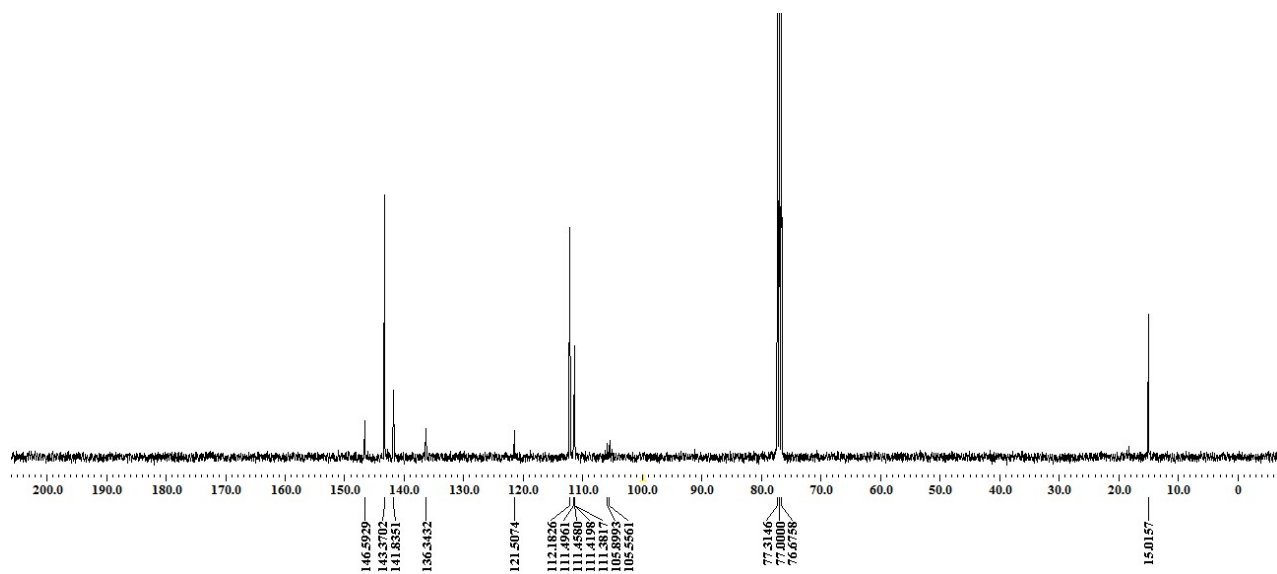



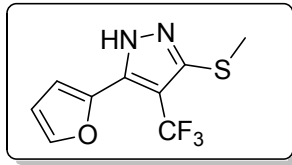

4k

**Data File** SBNS-384.d **Sample Name** SBNS-384  
**Sample Type** Sample **Position** P2F9  
**Instrument Name** Instrument 1 **User Name** lcmsdu-PC\admin  
**IRM Calibration Status** Success **DA Method** Default.m  
**Comment**  
**Sample Group** **Info.**  
**Acquisition SW** 6200 series TOF/6500 series  
**Version** Q-TOF B.05.01 (B5125)

**Compound Table**

| Compound Label         | RT    | Mass     | Formula         | MFG Formula     | MFG Diff (ppm) | DB Formula      |
|------------------------|-------|----------|-----------------|-----------------|----------------|-----------------|
| Cpd 5: C9 H7 F3 N2 O S | 0.202 | 248.0233 | C9 H7 F3 N2 O S | C9 H7 F3 N2 O S | -0.9           | C9 H7 F3 N2 O S |

| Compound Label         | m/z      | RT    | Algorithm                 | Mass     |
|------------------------|----------|-------|---------------------------|----------|
| Cpd 5: C9 H7 F3 N2 O S | 249.0306 | 0.202 | Find by Molecular Feature | 248.0233 |

**MFE MS Spectrum**

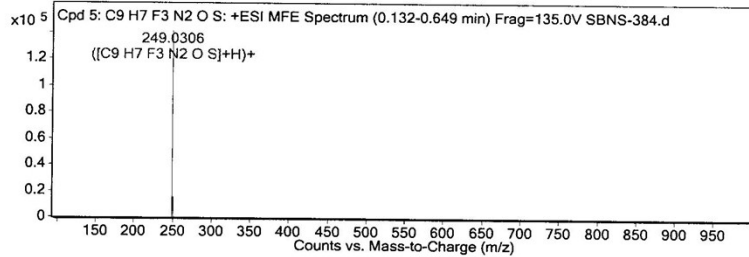

**MFE MS Zoomed Spectrum**

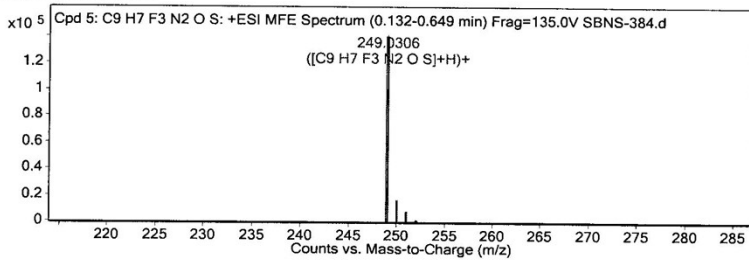

**MS Spectrum Peak List**

| m/z      | z | Abund     | Formula         | Ion    |
|----------|---|-----------|-----------------|--------|
| 249.0306 | 1 | 141447.28 | C9 H7 F3 N2 O S | (M+H)+ |
| 250.0334 | 1 | 15580.35  | C9 H7 F3 N2 O S | (M+H)+ |
| 251.028  | 1 | 6658.76   | C9 H7 F3 N2 O S | (M+H)+ |
| 252.0311 | 1 | 666.46    | C9 H7 F3 N2 O S | (M+H)+ |

--- End Of Report ---

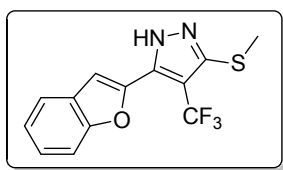

4l

<sup>1</sup>H-NMR in CDCl<sub>3</sub> (400MHz)

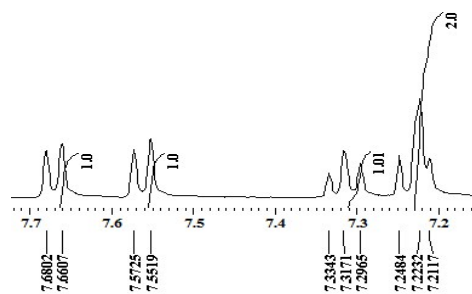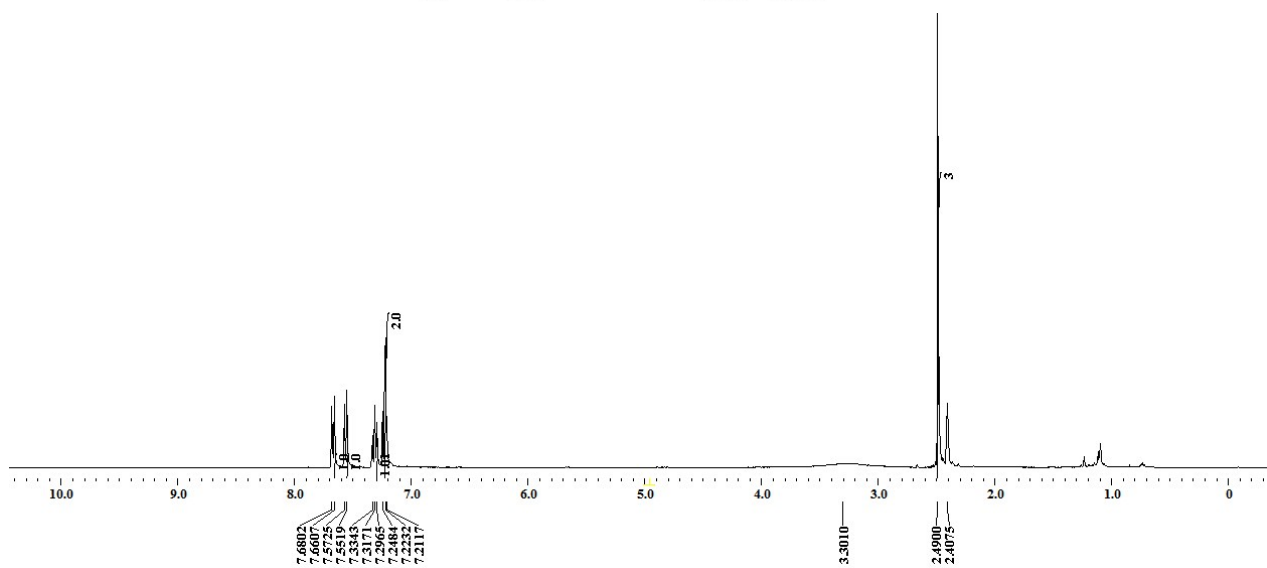

<sup>13</sup>C-NMR in CDCl<sub>3</sub> (100MHz)

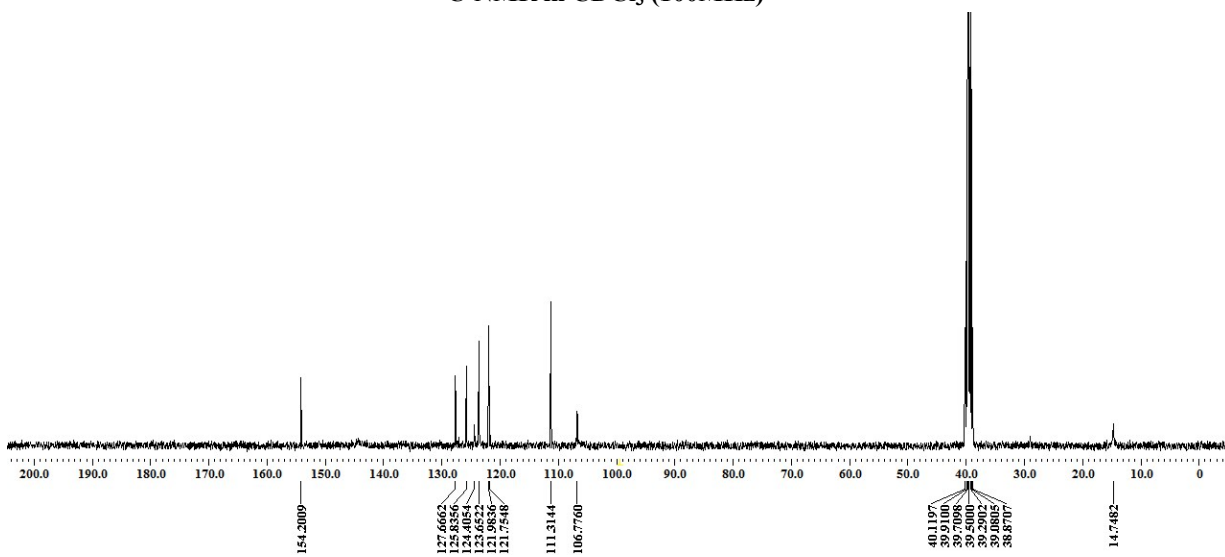

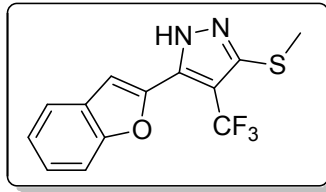

4I

**Data File** SB NS 373.d **Sample Name** SB NS 373  
**Sample Type** Sample **Position** P1E8  
**Instrument Name** Instrument 1 **User Name** lcmsdu-PC\admin  
**IRM Calibration Status** Success **DA Method** Default.m  
**Comment**  
**Sample Group** Info.  
**Acquisition SW** 6200 series TOF/6500 series  
**Version** Q-TOF B.05.01 (B5125)

**Compound Table**

| Compound Label          | RT    | Mass     | Formula          | MFG Formula      | MFG Diff (ppm) | DB Formula       |
|-------------------------|-------|----------|------------------|------------------|----------------|------------------|
| Cpd 2: C13 H9 F3 N2 O S | 0.208 | 298.0394 | C13 H9 F3 N2 O S | C13 H9 F3 N2 O S | -2.07          | C13 H9 F3 N2 O S |

| Compound Label          | m/z      | RT    | Algorithm                 | Mass     |
|-------------------------|----------|-------|---------------------------|----------|
| Cpd 2: C13 H9 F3 N2 O S | 299.0466 | 0.208 | Find by Molecular Feature | 298.0394 |

**MFE MS Spectrum**

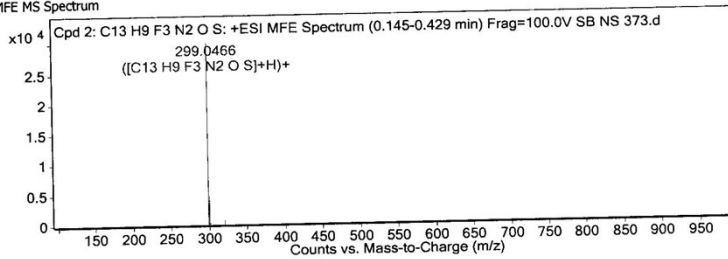

**MFE MS Zoomed Spectrum**

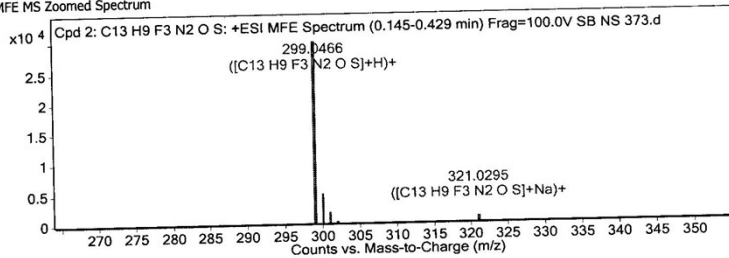

**MS Spectrum Peak List**

| m/z      | z | Abund    | Formula          | Ion     |
|----------|---|----------|------------------|---------|
| 299.0466 | 1 | 30043.73 | C13 H9 F3 N2 O S | (M+H)+  |
| 300.0498 | 1 | 4814.03  | C13 H9 F3 N2 O S | (M+H)+  |
| 301.0446 | 1 | 1909.71  | C13 H9 F3 N2 O S | (M+H)+  |
| 302.051  | 1 | 301.89   | C13 H9 F3 N2 O S | (M+H)+  |
| 321.0295 | 1 | 755.68   | C13 H9 F3 N2 O S | (M+Na)+ |

--- End Of Report ---
